# Supplementary material
Source: PubMed Central journal article supplement (PMC10432188)
Supplement: mmc1.pdf [file mmc1.pdf]

The American Journal of Human Genetics, Volume 110

**Supplemental information**

**Combined CRISPRi and proteomics screening reveal  
a cohesin-CTCF-bound allele contributing  
to increased expression of *RUVBL1* and prostate cancer progression**

**Yijun Tian, Dandan Dong, Zixian Wang, Lang Wu, Jong Y. Park, the PRACTICAL consortium, Gong-Hong Wei, and Liang Wang**

# Supplementary Figures

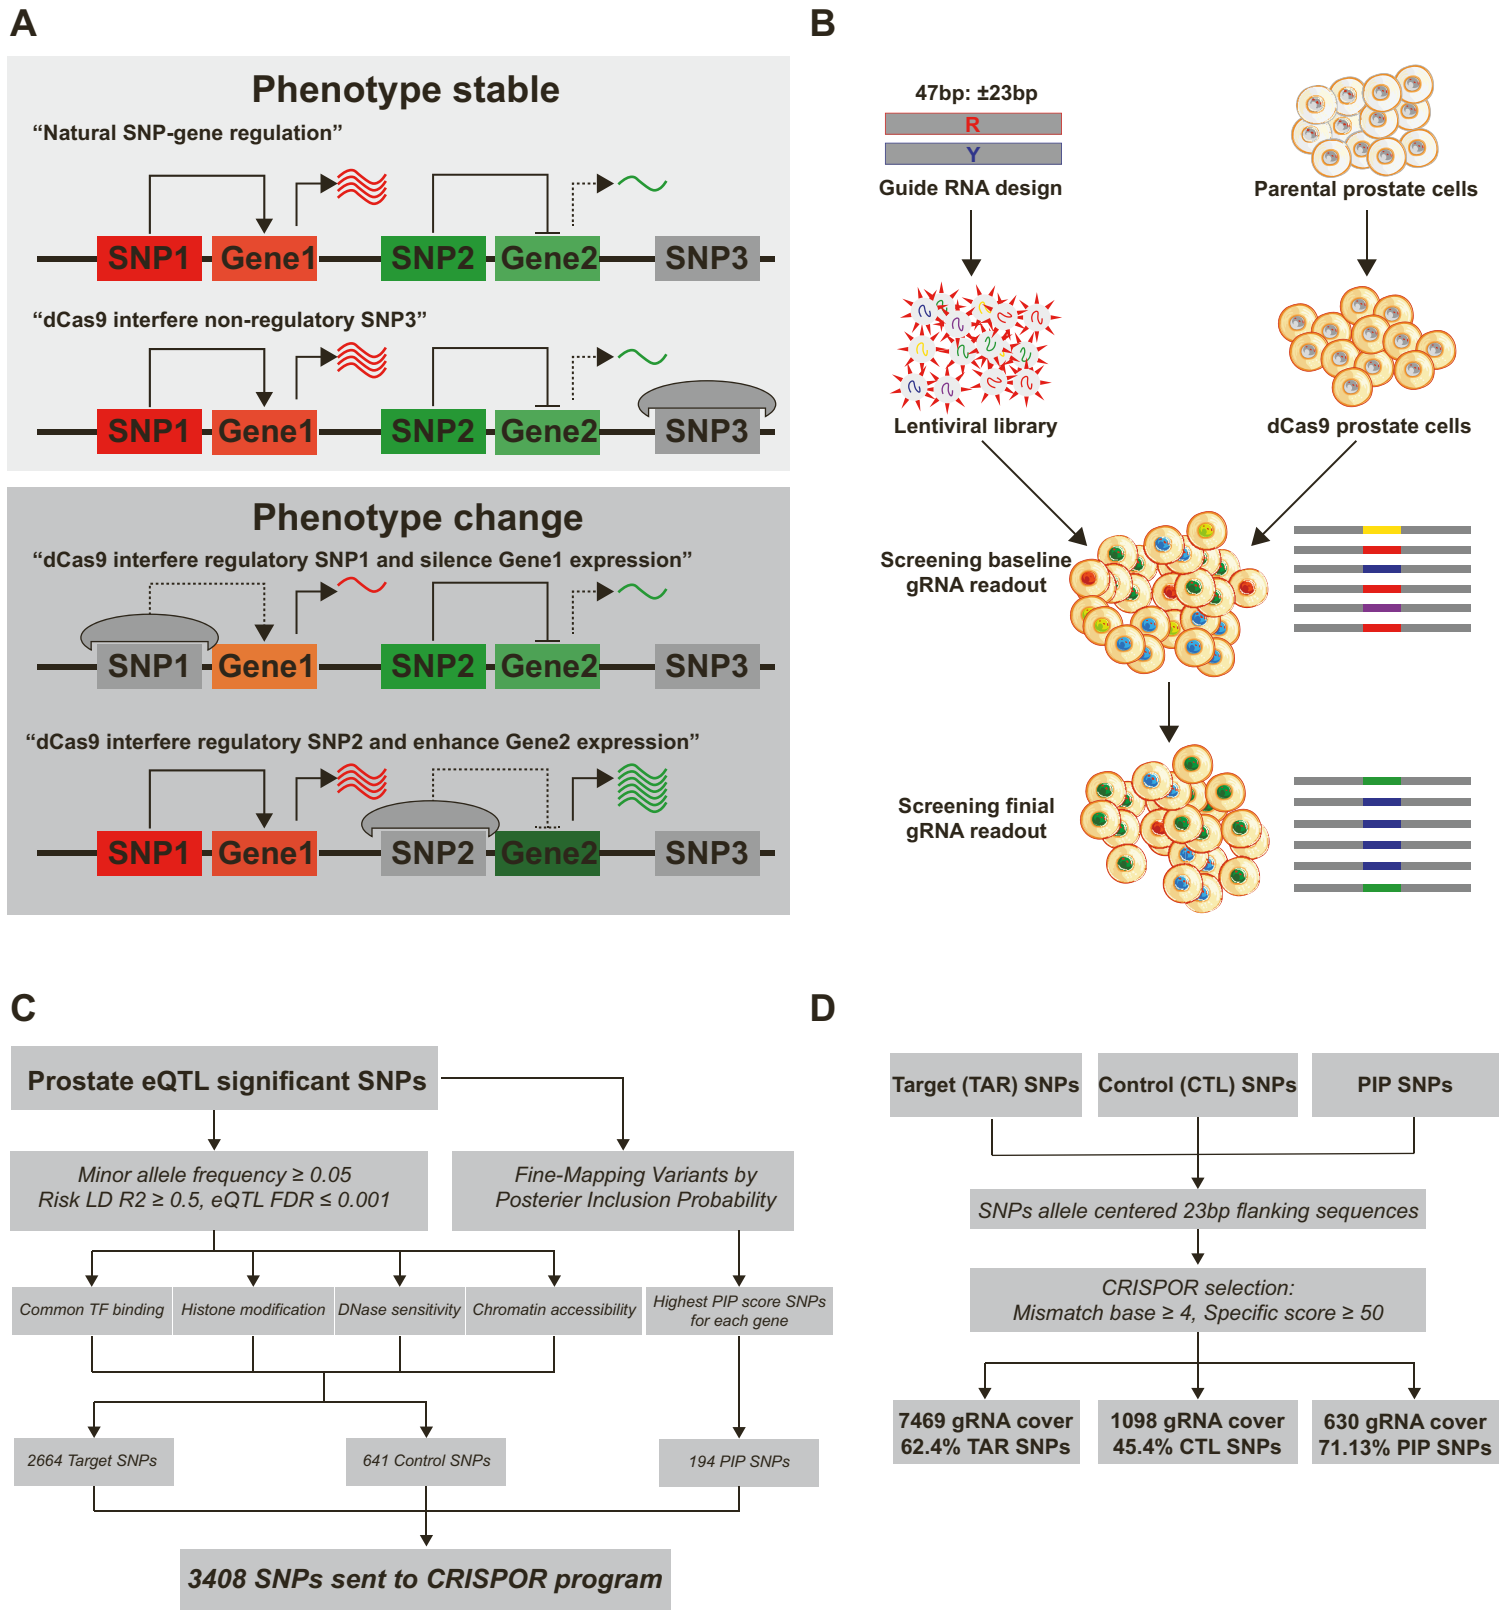

**Figure S1. Overall CRISPRi screening projection and design.** **A.** Rationale for phenotype oriented CRISPRi-SNPs-seq screening. **B.** CRISPRi screening procedures in dCas9 stable prostate cell lines. **C.** Candidate eQTL risk SNPs selection before gRNA design. **D.** gRNA searching details within candidate SNPs by CRISPOR program.

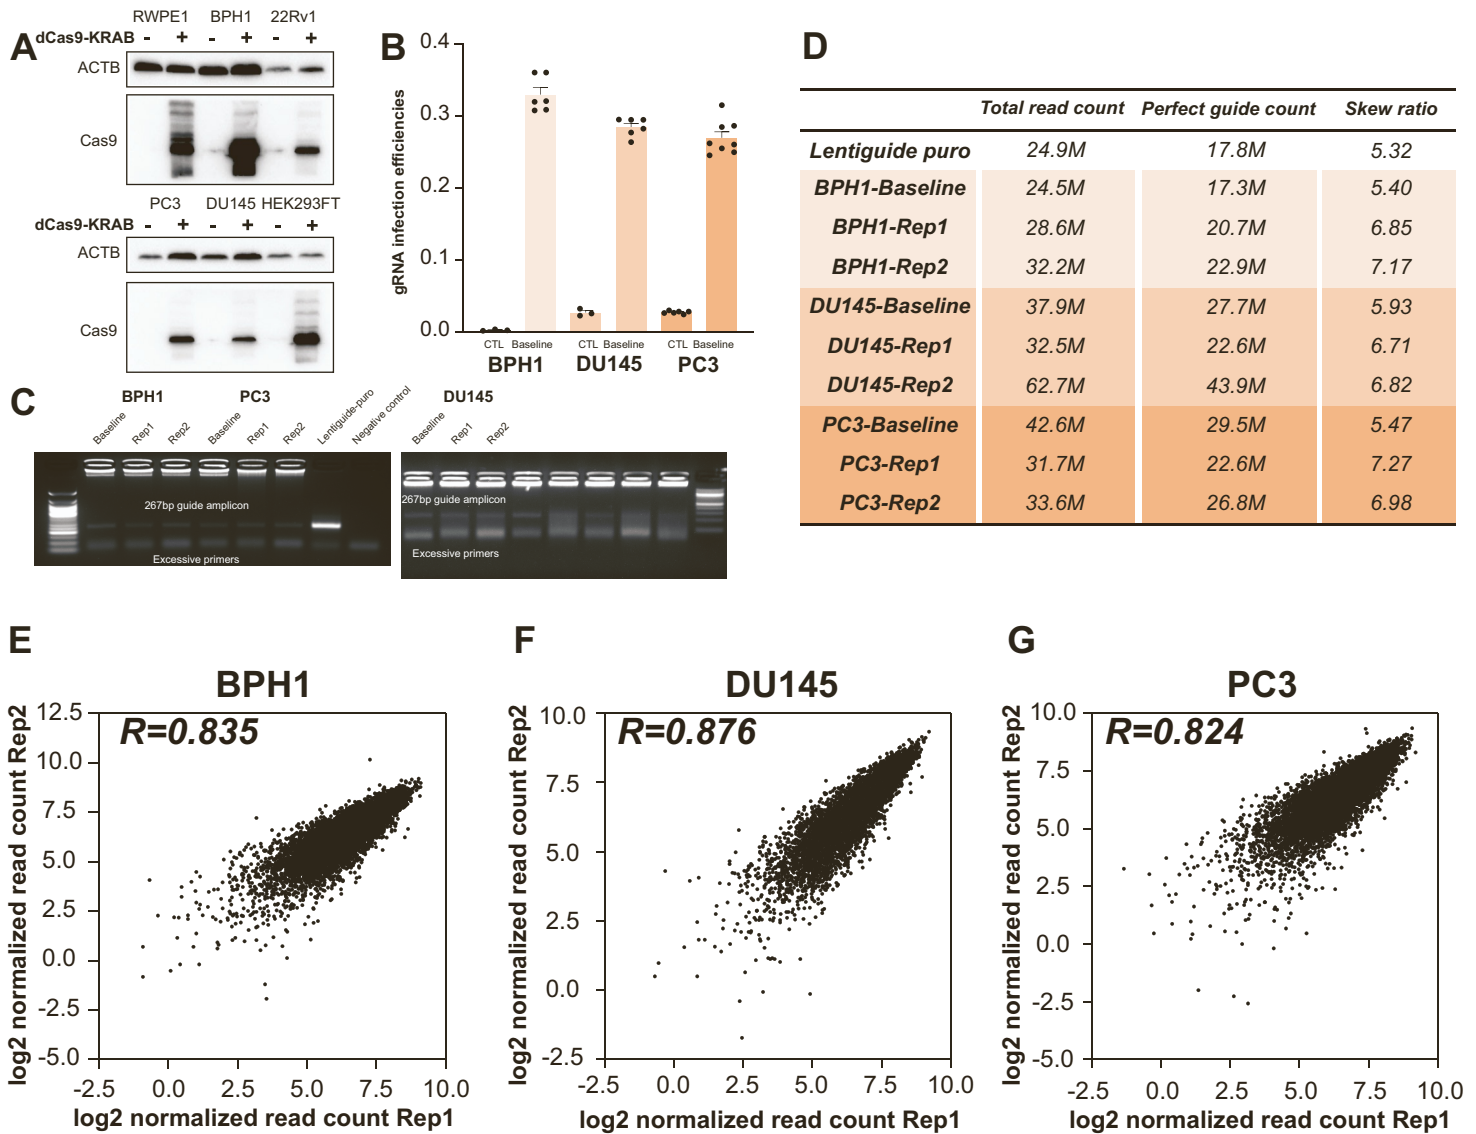

**Figure S2. CRISPRi screening quality control.** **A.** Western blots of Cas9 protein in dCas9 stable cell lines. **B.** Functional titration of lentiGuide-Puro virus to ensure low MOI integration. Each dot represents a titration technical replicate and the error bar represent the standard error across all measurement. **C.** Gel image of gRNA readout amplicon from each screening after PCR. The template gDNA amount for each sample is equivalent to extraction from at least 5 million cells. **D.** gRNA read count summary after count\_spacers.py quantification. **E-G.** Reproducibility of technical replicates in BPH1 (**E**), DU145 (**F**), and PC3 (**G**) cells.

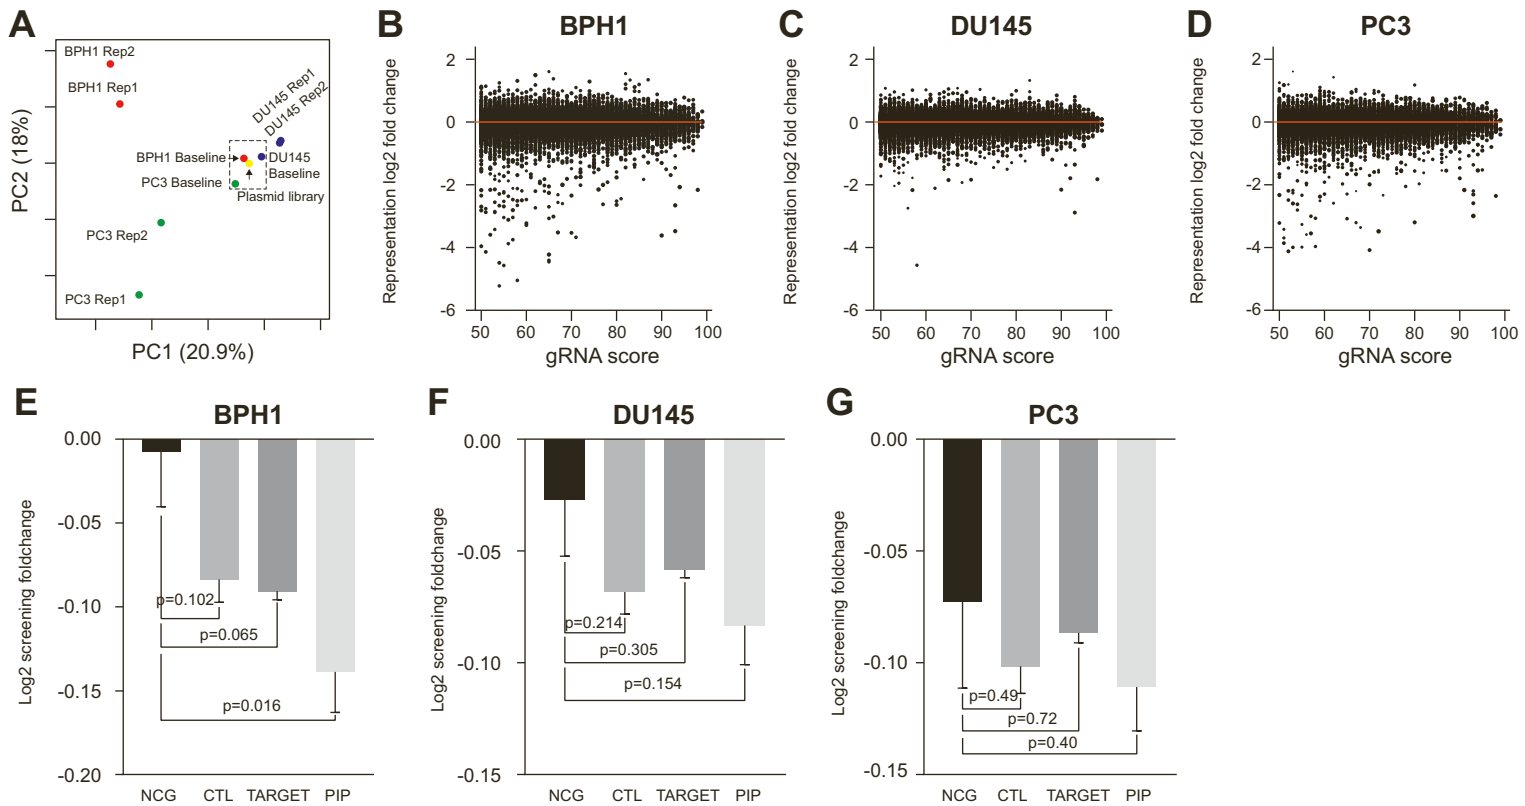

**Figure S3. Screening hit characterization.** **A.** PCA analysis of raw gRNA count in lentiGuide-Puro plasmid and each screening sample. **B-D.** Correlation between average gRNA foldchange and specificity score in BPH1 (**B**), DU145 (**C**), and PC3 (**D**) cells. **E-G.** gRNA foldchange comparison between predefined categories in BPH1 (**E**), DU145 (**F**), and PC3 (**G**) cells. The gRNA foldchange was calculated by averaging between the 2 biological replicates. The error bar represented the standard error of gRNA foldchange within each category.

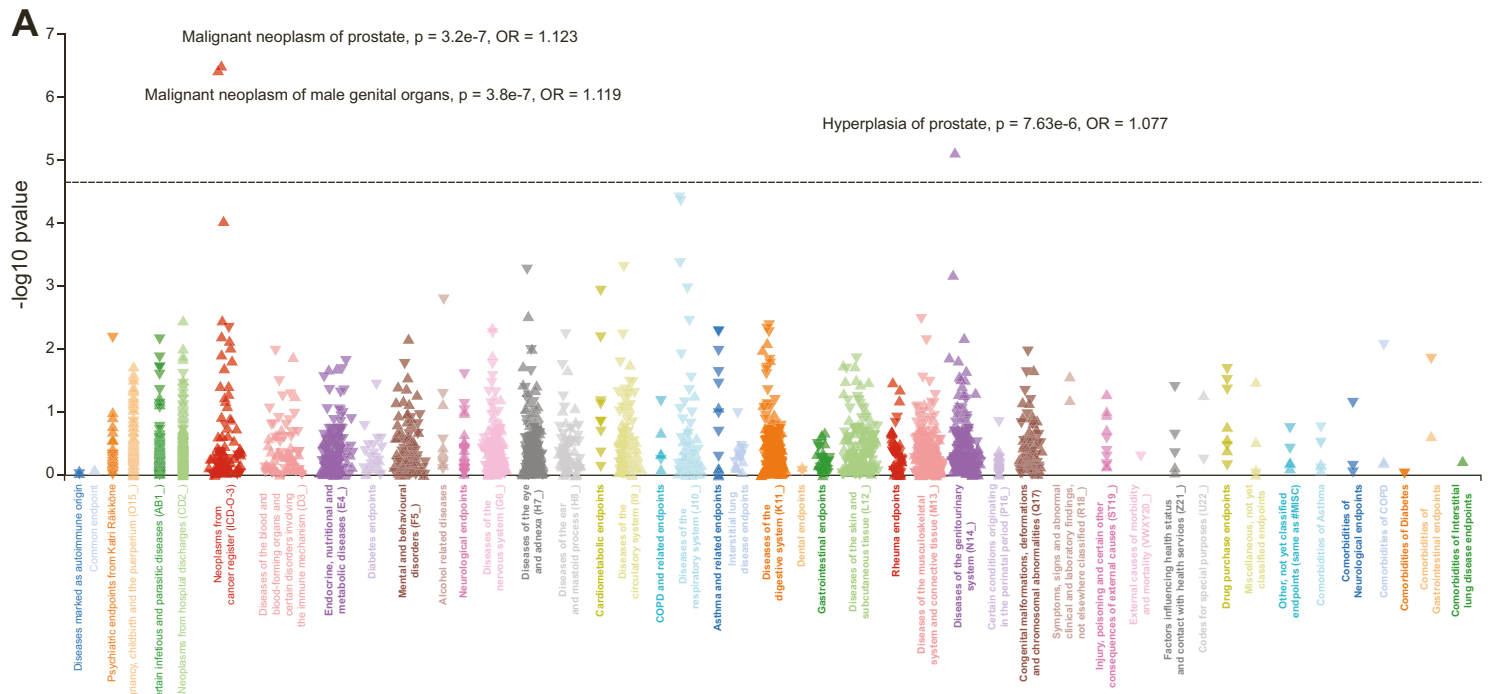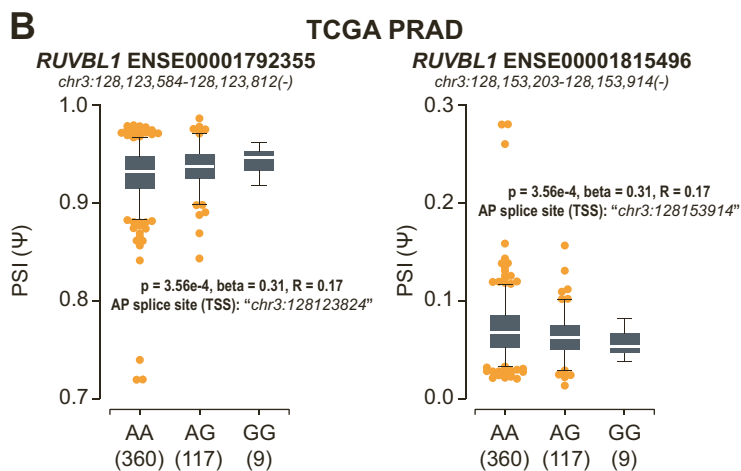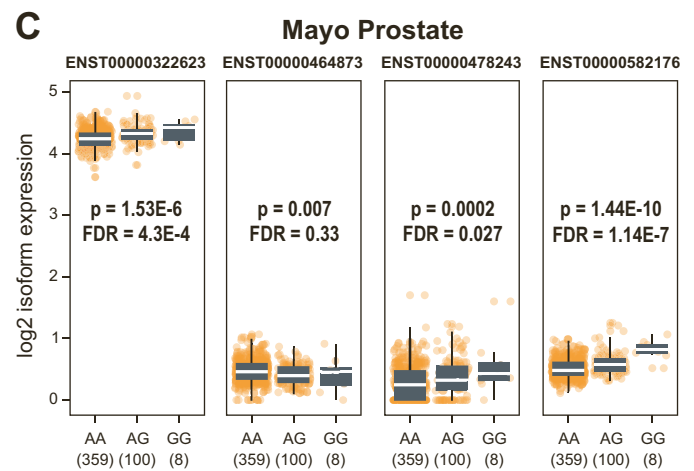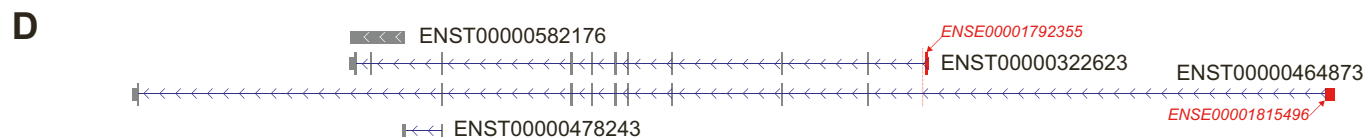

**Figure S4. Prostate cancer risk and *RUVBL1* splicing associations with rs60464856 in existing GWAS and RNA-seq cohorts. A.** PheWAS results between rs60464856 and 2,202 endpoints in the FinnGen study ( $n = 342,499$ ). **B.** Associations between *RUVBL1* alternative promoter (AP) percent Spliced In (PSI,  $\Psi$ ) values and rs60464856 genotype. The ENSEMBL id indicated the first exon used by the corresponding AP event. The  $\Psi$  values were obtained from TCGA SpliceSeq databases. The p-values were retrieved from the TCGA Pan-Cancer Splicing QTL databases. **C.** Associations between *RUVBL1* isoform expression and rs60464856 genotype in Mayo prostate cohort. The p-value and FDR were calculated by MatrixEQTL package. **D.** Demonstration of *RUVBL1* gene structure in relation to the exons and isoforms discussed in the above plots.

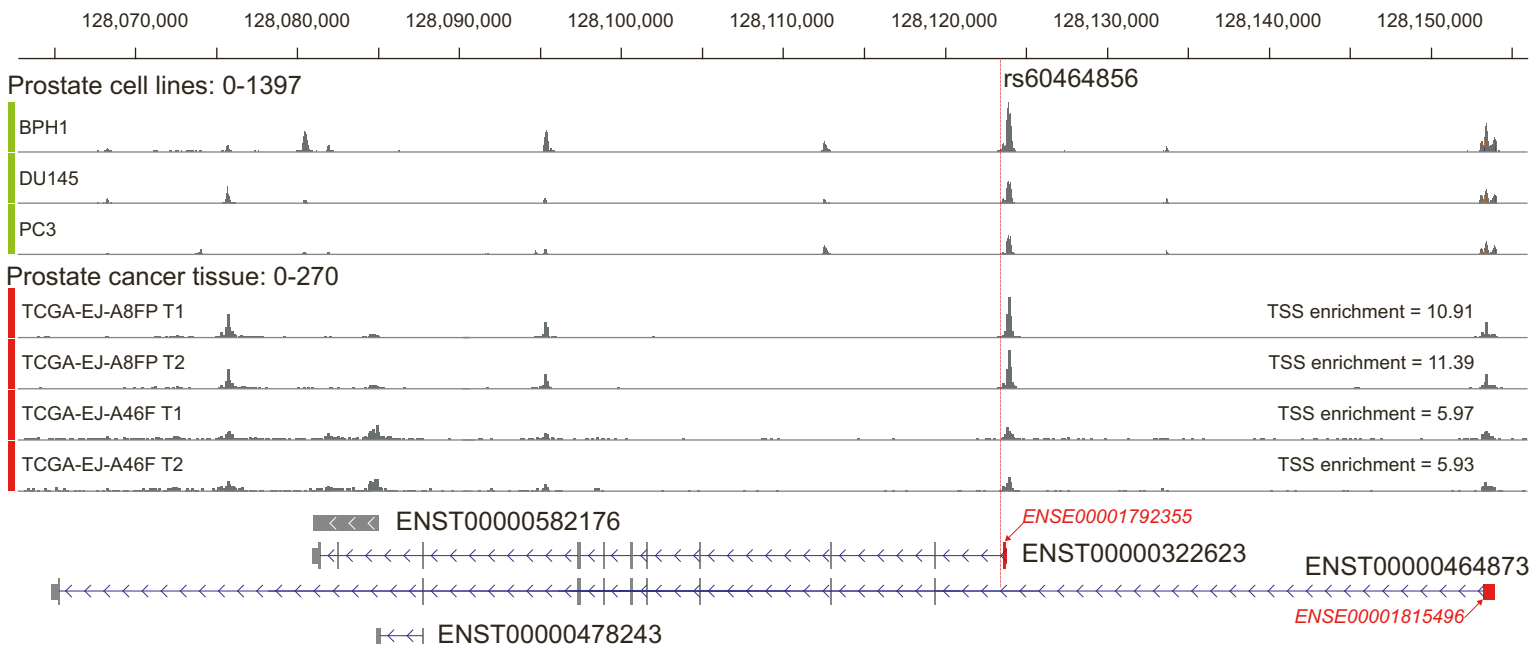

**Figure S5. Chromatin accessibility surrounding rs60464856 locus in prostate cell lines and prostate cancer tissue.** The ATAC-seq data for prostate cell lines and TCGA prostate cancer cohorts were visualized in the IGV browser. The TSS enrichment scores were obtained from the TCGA chromatin accessibility landscape: <https://gdc.cancer.gov/about-data/publications/ATACseq-AW>. Two prostate cancer samples with minimal (TCGA-EJ-A46F) and maximum (TCGA-EJ-A8FP) enrichment scores were chosen to bona fide present the consistent accessible profiling surrounding the rs60464856 locus in prostate cancer genome.

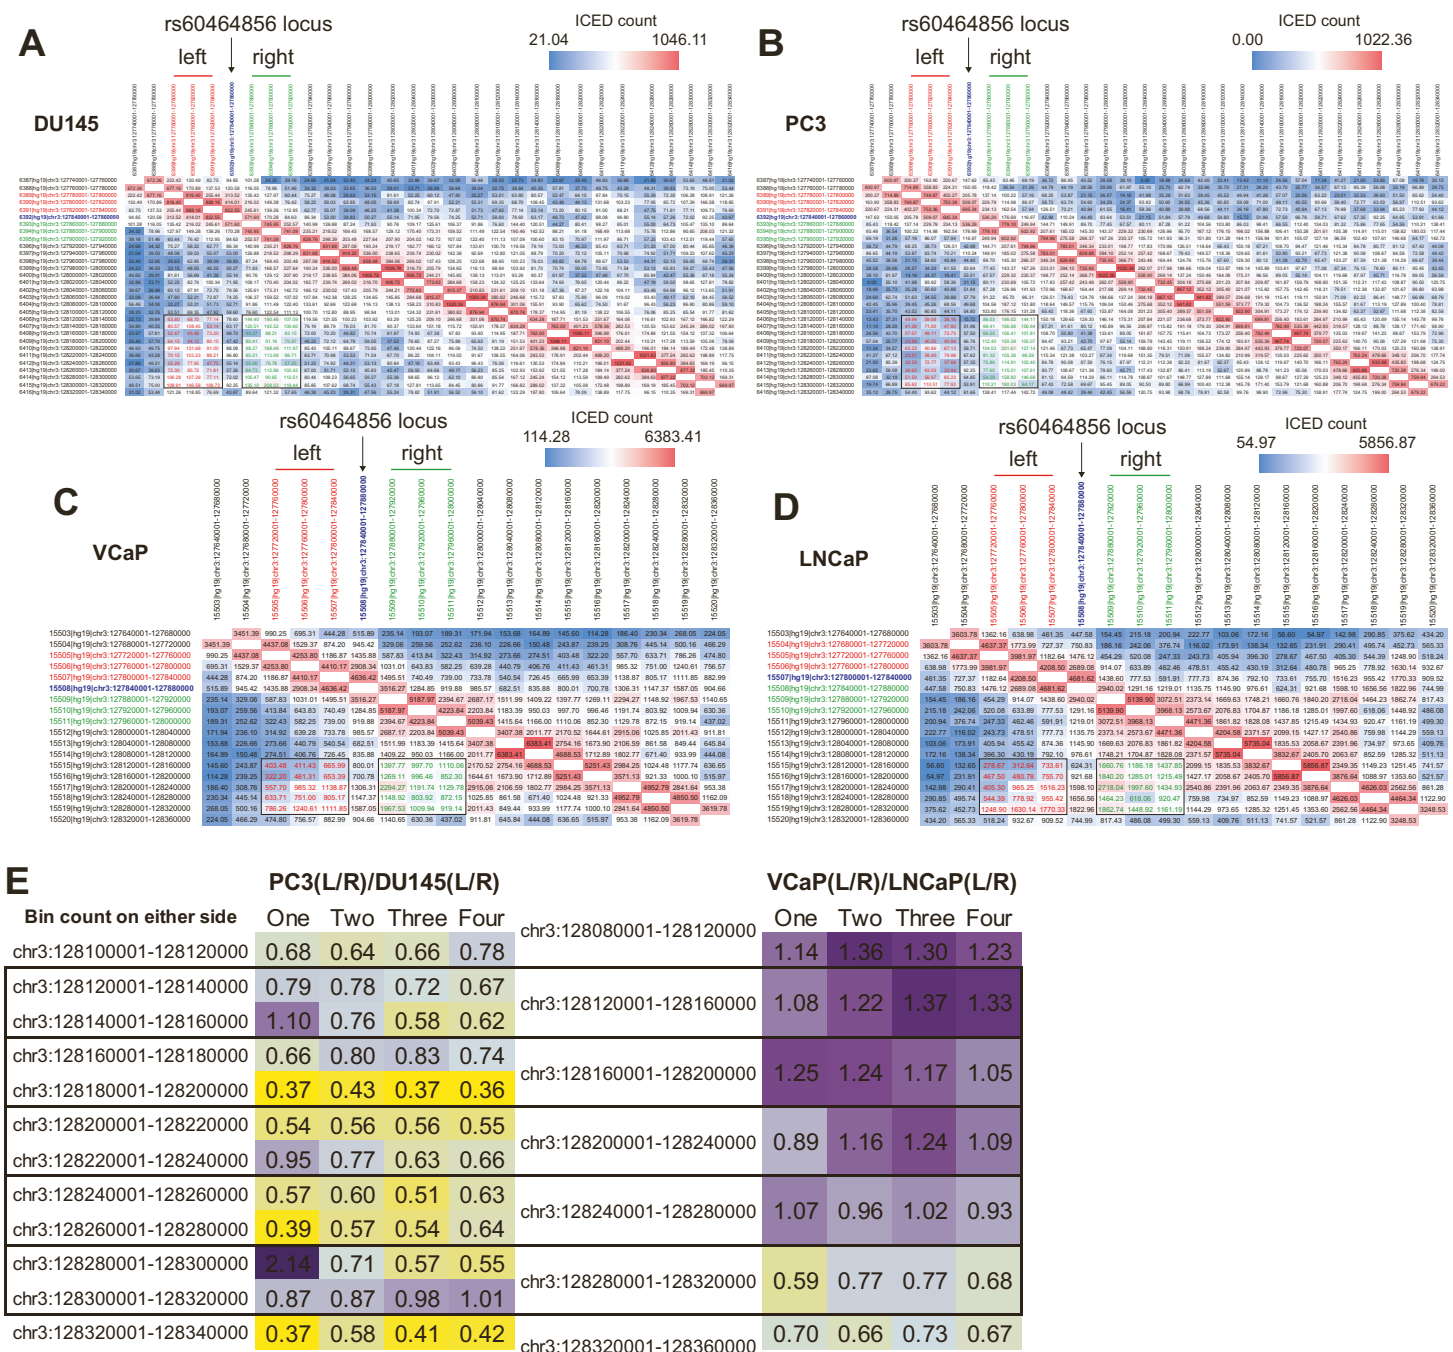

**Figure S6. Detail Hi-C analysis in prostate cell lines to calculate left-to-right (L/R) ratio.** A-D. ICED count matrix surrounding the hotspot centering on rs60464856 in the HiC heatmap of DU145 (A), PC3 (B), VCaP (C) and LNCaP (D). The ICED count for the hotspot was aggregated for the left (red numbers) and the right (green numbers), and further divided from left to right to obtain the L/R ratio in each cell line. E. Additional L/R ratios calculated based on various other options, including ratios calculated from different bin numbers on each side, and ratios calculated from individual bins in the distant regions.

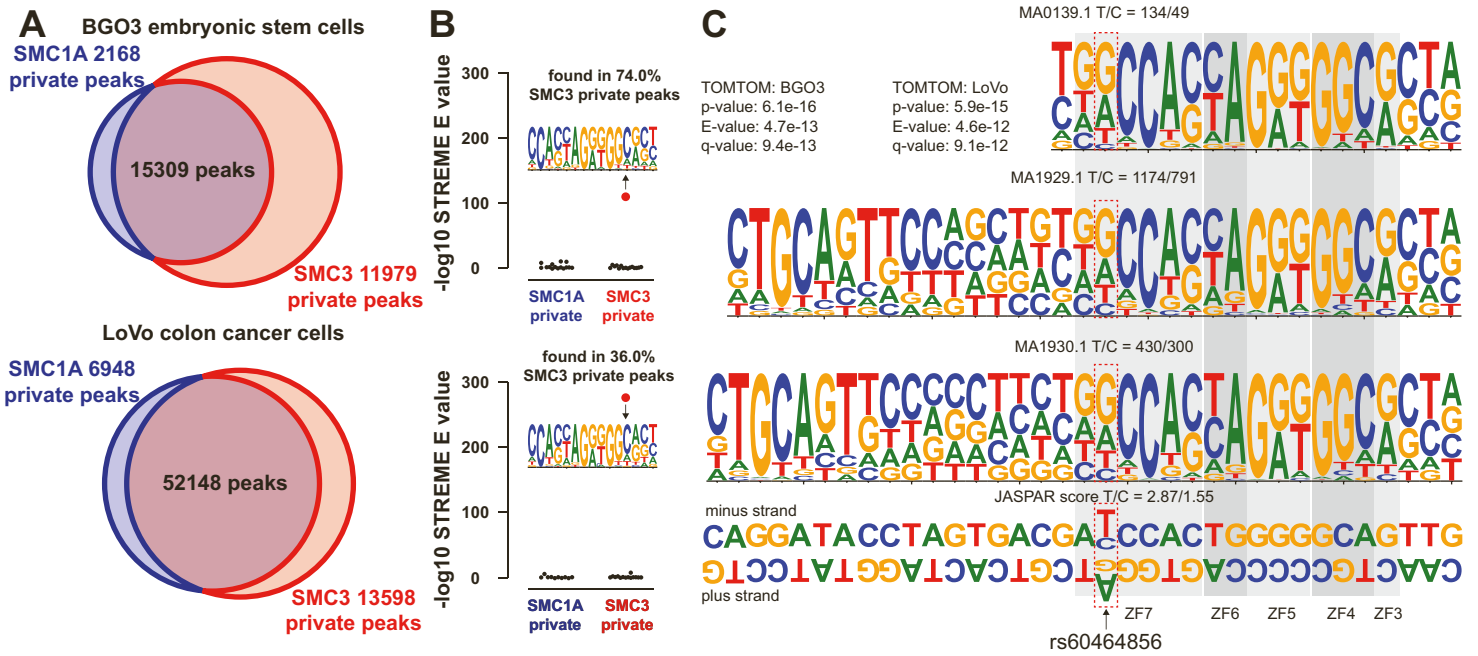

**Figure S7. Motif analysis for SMC1A and SMC3 in human cell lines.** **A.** Proportional Venn diagram of SMC1A and SMC3 ChIP-seq peak overlapping in BGO3 and LoVo cell lines. The private peak was highlighted with color strokes in the pie chart. We defined the private peak regions as those merely showed in SMC1A or SMC3 ChIP-seq capturing. **B.** STREME motif scan in BGO3 and LoVo cell lines. **C.** TOMTOM comparison of SMC3 private motif to CTCF(MA0139.1) and base composition on SNP location in different CTCF motifs. The shaded blocks highlighted DNA binding sites interacting with CTCF zinc finger (ZF) domains.



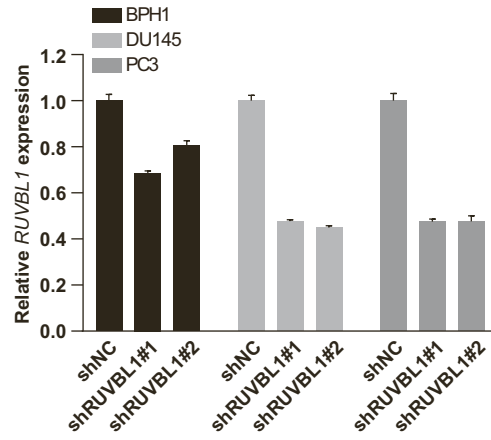

**Figure S8. qPCR results of lentiviral shRNA knockdown in BPH1, DU145 and PC3 cells.** The error bar represented standard error across three technical replicates for each shRNA clone.

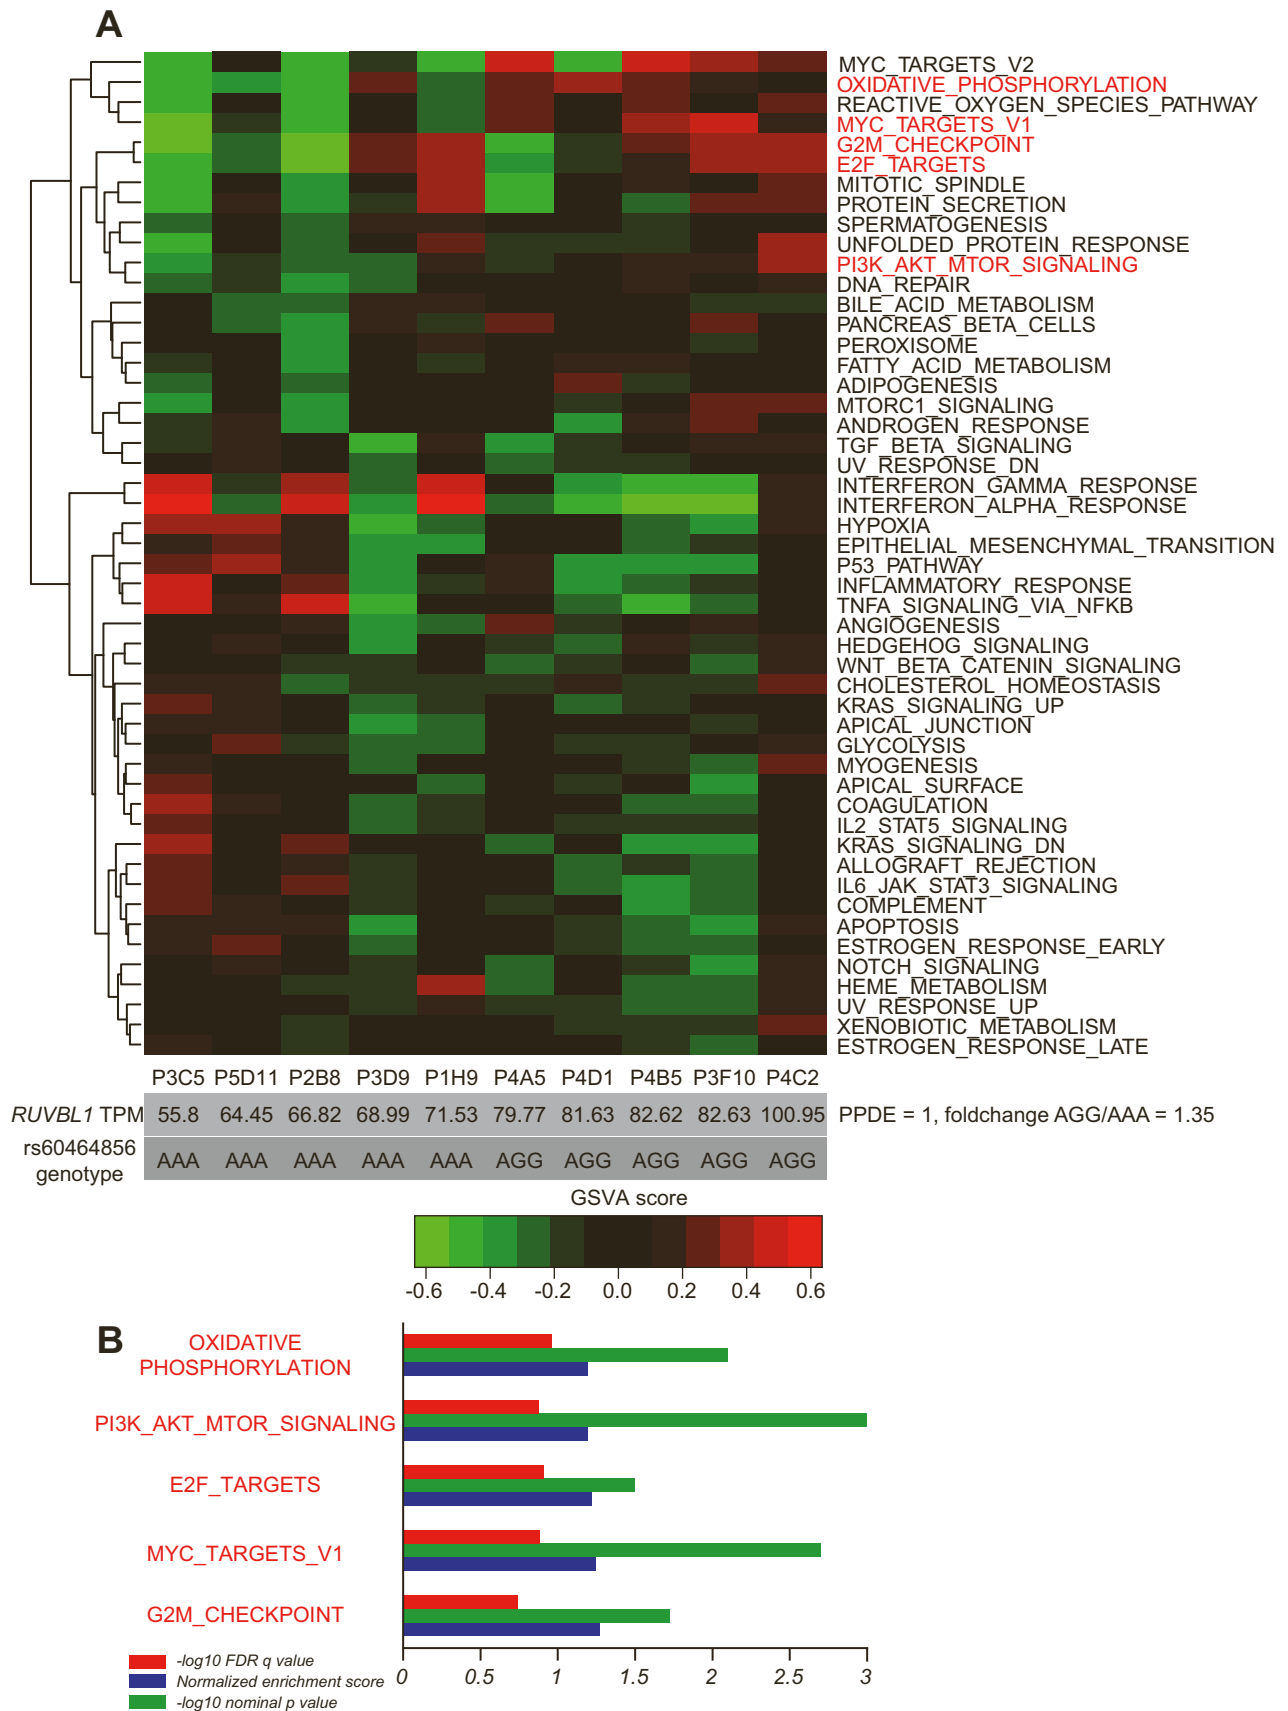

**Figure S9. RNA-seq profiling of base edited BPH1 clones A.** GSEA score heatmap of the HALLMARK gene set collections. Pathways enriched with the top 5 normalized enrichment scores were highlighted. **B.** Top 5 enriched HALLMARK pathways with detailed GSEA metrics, including nominal pvalue, FDR qvalue and normalized enrichment score.

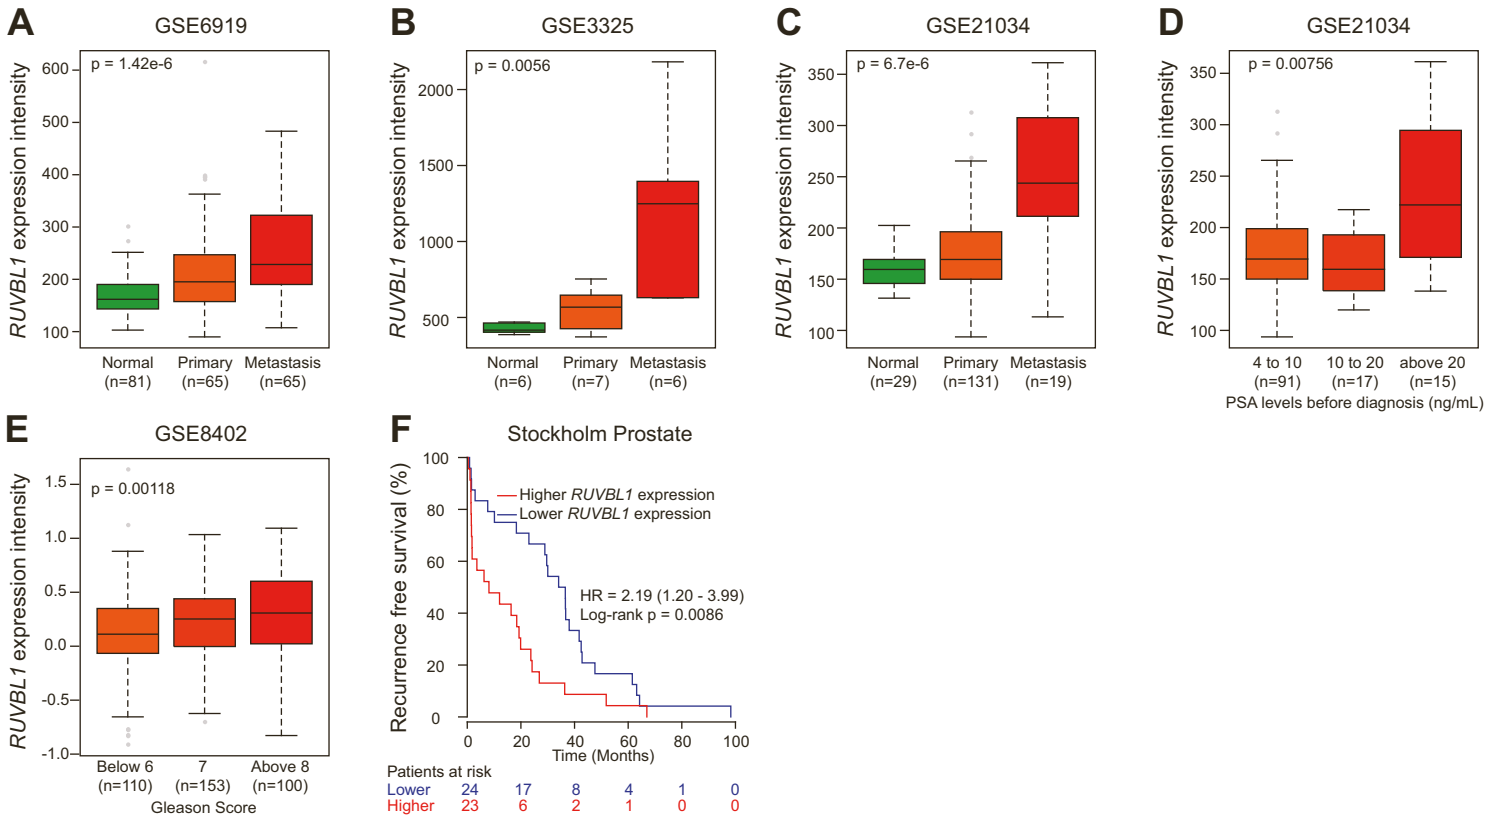

**Figure S10. Associations between *RUVBL1* gene expression and clinicopathological variables in other prostate cancer cohorts. A-C.** Associations between *RUVBL1* gene expression and prostate cancer tissue type in Yu (A), Varambally (B), and Taylor’s (C) prostate cancer cohorts. **D.** Associations between *RUVBL1* gene expression and the pre-diagnosis prostate-specific antigen (PSA) levels in Taylor’s prostate cancer cohorts. **E.** Associations between *RUVBL1* gene expression and the Gleason score in Setlur’s prostate cancer cohorts. **F.** Kaplan-Meier analysis on biochemical recurrence-free survival in Stockholm prostate cohort stratified by *RUVBL1* expression. The Mann-Whitney U test was used to calculate the p-value for A to E. The whiskers are drawn down to the 10th percentile and up to the 90th.

## Supplementary Tables

| Primer Sequences for QPCR                        |                                        |
|--------------------------------------------------|----------------------------------------|
| RUVBL1-mRNA-F                                    | AGGTGAAGAGCACTACGAAGA                  |
| RUVBL1-mRNA-R                                    | CTACTATGACGCCACATGCCT                  |
| ACTB-mRNA-F                                      | CCAGAGCAAGAGAGGCATCC                   |
| ACTB-mRNA-R                                      | GTACATGGCTGGGGTGTGA                    |
| Primer Sequences for reporter assay construction |                                        |
| RUVBL1_Gibson_F                                  | cggcgccaagcttagacacCACATCTCACGTTGCAAG  |
| RUVBL1_Gibson_R                                  | aacagtaccggattgccaagTCTTCATTTTGCAGACGC |
| shRNA sequences                                  |                                        |
| shRUVBL1#1-Sense                                 | GUGGCGUCAUAGUAGAAUUA                   |
| shRUVBL1#1-Antisense                             | UUAAUUCUACUAUGACGCCAC                  |
| shRUVBL1#2-Sense                                 | CCGCCAACUUGCUUGCUAAA                   |
| shRUVBL1#2-Antisense                             | UUUAGCAAGCAAGUUGGCCGG                  |
| shNC-Sense                                       | CCUAAGGUUAAGUCGCCUCG                   |
| shNC-Antisense                                   | CGAGGGCGACUUAACCUUAGG                  |
| Primers for genome editing                       |                                        |
| rs60464856-A2G-gRNA                              | TGGATCGTCACTAGGTATCC                   |
| rs60464856-Sanger-F                              | TAATTCGGCTGTATCCCAGTGTC                |
| rs60464856-Sanger-R                              | CCCGCCATTATTTCTCAGGGAAGT               |
| ARMS-F-outer                                     | AACCGTCCCATAGCCTGCCACTGCATTC           |
| ARMS-R-outer                                     | AGAGGTGTGGCCAGTGGACCAGGGAGTT           |
| ARMS-R-inner                                     | GGGGCCGCCCCAGGATACCTAGTGACTAC          |
| Primers for ChIP-qPCR                            |                                        |
| rs60464856-locus-F                               | TAATTCGGCTGTATCCCAGTGTC                |
| rs60464856-locus-R                               | CCCGCCATTATTTCTCAGGGAAGT               |
| rs60464856-NC-F                                  | AAGTGAGGCATTCTATGGGACTG                |
| rs60464856-NC-R                                  | CCAGGGGATATTTCTCTGTGC                  |
| AS-rs60464856-R-A                                | CCAGGATACCTAGTGACGAC                   |
| AS-rs60464856-R-G                                | CCAGGATACCTAGTGACGAT                   |
| AS-rs60464856-F                                  | CAAAGCCCTGCAGTAACTAACC                 |

**Table S1. Sequences of primers and oligos used in this project.**

|                         | Accession number and web link                  |
|-------------------------|------------------------------------------------|
| DU145 – H3K4me1         | SRR3624829, SRR3624830                         |
| DU145 – H3K4me3         | SRR3624831                                     |
| DU145 – H3K27ac         | SRR5823947                                     |
| PC-3 – H3K4me1          | ENCSR566UMF                                    |
| PC-3 – H3K4me3          | ENCSR275NCH                                    |
| PC-3 – H3K27ac          | ENCSR826UTD                                    |
| PrEC – H3K4me1          | SRR1282226                                     |
| PrEC – H3K4me3          | SRR1282227                                     |
| PrEC – H3K27ac          | SRR1282224                                     |
| RWPE-1 – H3K4me1        | SRR1645120, SRR1645121                         |
| RWPE-1 – H3K4me3        | SRR1645122, SRR1645123                         |
| RWPE-1 – H3K27ac        | SRR1645108, SRR1645109, SRR1645110, SRR1645111 |
| BGO-SMC1                | SRR445918                                      |
| BGO-SMC3                | SRR445917                                      |
| LoVo-SMC1               | SRR952473                                      |
| LoVo-SMC3               | SRR952474                                      |
| Yu's PCa cohort         | GSE6919                                        |
| Varambally's PCa cohort | GSE3325                                        |
| Taylor's PCa cohort     | GSE21034                                       |
| Setlur's PCa cohort     | GSE8402                                        |
| Stockholm's PCa cohort  | GSE70769                                       |

**Table S4. Published datasets used in this project.**

**Table S2 (Spreadsheet table).** CRISPRi gRNA design and readout quantification.

**Table S3 (Spreadsheet table).** Proliferative essential SNPs identified in the RIGER analysis.

**Table S5 (Spreadsheet table).** DNA pull down profiling in BPH1 SILAC proteomics.

## Supplemental Material and Methods

### The motif analysis of SMC1A and SMC3 ChIP-seq data

To identify the SMC1A or SMC3 specific binding motif, we retrieved the ChIP-seq peak BED files (Download: BED Peaks menu) of BGO3 and LoVo cell lines from Cistrome Data Browser (<http://cistrome.org/db/#/>) and used intervene software (<https://intervene.readthedocs.io/en/latest/introduction.html>) to determine the private peaks. We defined the SMC1A private peaks as those without any overlap with SMC3 peaks, and vice versa for the SMC3 private peaks. As a result, we obtained 2,168 private peaks for SMC1A and 11,979 private peaks for SMC3 in BGO3 cells, and 6,948 private peaks for SMC1A and 13,598 private peaks for SMC3 in LoVo cells. We then used the STREME module in MEME Suite (<https://meme-suite.org/meme/index.html>) to scan for motif enrichment with shuffled control sequences under default settings. We plotted all motifs discovered with E-value less than 0.05 for each scanning and compared the standing out motif (red dot in Figure S7B) to the HOCOMOCO motif collection with TOMTOM module to identify known DNA motifs.

## Author list for PRACTICAL Consortium

Rosalind A. Eeles<sup>1,2</sup>, Christopher A. Haiman<sup>3</sup>, Zsofia Kote-Jarai<sup>1</sup>, Fredrick R. Schumacher<sup>4,5</sup>, Sara Benlloch<sup>6,1</sup>, Ali Amin Al Olama<sup>6,7</sup>, Kenneth R. Muir<sup>8</sup>, Sonja I. Berndt<sup>9</sup>, David V. Conti<sup>3</sup>, Fredrik Wiklund<sup>10</sup>, Stephen Chanock<sup>9</sup>, Ying Wang<sup>11</sup>, Catherine M. Tangen<sup>12</sup>, Jyotsna Batra<sup>13,14</sup>, Judith A. Clements<sup>13,14</sup>, APCB BioResource (Australian Prostate Cancer BioResource)<sup>15,14</sup>, Henrik Grönberg<sup>10</sup>, Nora Pashayan<sup>16,17</sup>, Johanna Schleutker<sup>18,19</sup>, Demetrius Albanes<sup>9</sup>, Stephanie J. Weinstein<sup>9</sup>, Alicja Wolk<sup>20</sup>, Catharine M. L. West<sup>21</sup>, Lorelei A. Mucci<sup>22</sup>, Géraldine Cancel-Tassin<sup>23,24</sup>, Stella Koutros<sup>9</sup>, Karina Dalsgaard Sørensen<sup>25,26</sup>, Eli Marie Grindedal<sup>27</sup>, David E. Neal<sup>28,29,30</sup>, Freddie C. Hamdy<sup>31,32</sup>, Jenny L. Donovan<sup>33</sup>, Ruth C. Travis<sup>34</sup>, Robert J. Hamilton<sup>35,36</sup>, Sue Ann Ingles<sup>37</sup>, Barry S. Rosenstein<sup>38</sup>, Yong-Jie Lu<sup>39</sup>, Graham G. Giles<sup>40,41,42</sup>, Robert J. MacInnis<sup>40,41</sup>, Adam S. Kibel<sup>43</sup>, Ana Vega<sup>44,45,46</sup>, Manolis Kogevinas<sup>47,48,49,50</sup>, Kathryn L. Penney<sup>51</sup>, Jong Y. Park<sup>52</sup>, Janet L. Stanford<sup>53,54</sup>, Cezary Cybulski<sup>55</sup>, Børge G. Nordestgaard<sup>56,57</sup>, Sune F. Nielsen<sup>56,57</sup>, Hermann Brenner<sup>58,59,60</sup>, Christiane Maier<sup>61</sup>, Jeri Kim<sup>62</sup>, Esther M. John<sup>63</sup>, Manuel R. Teixeira<sup>64,65,66</sup>, Susan L. Neuhausen<sup>67</sup>, Kim De Ruyck<sup>68</sup>, Azad Razack<sup>69</sup>, Lisa F. Newcomb<sup>53,70</sup>, Davor Lesel<sup>71</sup>, Radka Kaneva<sup>72</sup>, Nawaid Usmani<sup>73,74</sup>, Frank Claessens<sup>75</sup>, Paul A. Townsend<sup>76,77</sup>, Jose Esteban Castelao<sup>78</sup>, Monique J. Roobol<sup>79</sup>, Florence Menegaux<sup>80</sup>, Kay-Tee Khaw<sup>81</sup>, Lisa Cannon-Albright<sup>82,83</sup>, Hardev Pandha<sup>77</sup>, Stephen N. Thibodeau<sup>84</sup>, David J. Hunter<sup>85</sup>, Peter Kraft<sup>86</sup>, William J. Blot<sup>87,88</sup>, Elio Riboli<sup>89</sup>

<sup>1</sup>The Institute of Cancer Research, London, SM2 5NG, UK

<sup>2</sup>Royal Marsden NHS Foundation Trust, London, SW3 6JJ, UK

<sup>3</sup>Center for Genetic Epidemiology, Department of Preventive Medicine, Keck School of Medicine, University of Southern California/Norris Comprehensive Cancer Center, Los Angeles, CA 90015, USA

<sup>4</sup>Department of Population and Quantitative Health Sciences, Case Western Reserve University, Cleveland, OH 44106-7219, USA

<sup>5</sup>Seidman Cancer Center, University Hospitals, Cleveland, OH 44106, USA.

<sup>6</sup>Centre for Cancer Genetic Epidemiology, Department of Public Health and Primary Care, University of Cambridge, Strangeways Research Laboratory, Cambridge CB1 8RN, UK

<sup>7</sup>University of Cambridge, Department of Clinical Neurosciences, Stroke Research Group, R3, Box 83, Cambridge Biomedical Campus, Cambridge CB2 0QQ, UK

<sup>8</sup>Division of Population Health, Health Services Research and Primary Care, University of Manchester, Oxford Road, Manchester, M13 9PL, UK

<sup>9</sup>Division of Cancer Epidemiology and Genetics, National Cancer Institute, NIH, Bethesda, Maryland, 20892, USA

<sup>10</sup>Department of Medical Epidemiology and Biostatistics, Karolinska Institute, SE-171 77 Stockholm, Sweden

<sup>11</sup>Department of Population Science, American Cancer Society, 250 Williams Street, Atlanta, GA 30303, USA

<sup>12</sup>SWOG Statistical Center, Fred Hutchinson Cancer Research Center, Seattle, WA 98109, USA

<sup>13</sup>Australian Prostate Cancer Research Centre-Qld, Institute of Health and Biomedical Innovation and School of Biomedical Sciences, Queensland University of Technology, Brisbane QLD 4059, Australia

<sup>14</sup>Translational Research Institute, Brisbane, Queensland 4102, Australia

<sup>15</sup>Australian Prostate Cancer Research Centre-Qld, Queensland University of Technology, Brisbane; Prostate Cancer Research Program, Monash University, Melbourne; Dame Roma Mitchell Cancer Centre, University of Adelaide, Adelaide; Chris O'Brien Lifehouse and The Kinghorn Cancer Centre, Sydney, Australia



- <sup>16</sup>Department of Applied Health Research, University College London, London, WC1E 7HB, UK
- <sup>17</sup>Centre for Cancer Genetic Epidemiology, Department of Oncology, University of Cambridge, Strangeways Laboratory, Worts Causeway, Cambridge, CB1 8RN, UK
- <sup>18</sup>Institute of Biomedicine, University of Turku, Finland
- <sup>19</sup>Department of Medical Genetics, Genomics, Laboratory Division, Turku University Hospital, PO Box 52, 20521 Turku, Finland
- <sup>20</sup>Department of Surgical Sciences, Uppsala University, 75185 Uppsala, Sweden
- <sup>21</sup>Division of Cancer Sciences, University of Manchester, Manchester Academic Health Science Centre, Radiotherapy Related Research, The Christie Hospital NHS Foundation Trust, Manchester, M13 9PL UK
- <sup>22</sup>Department of Epidemiology, Harvard T. H. Chan School of Public Health, Boston, MA 02115, USA
- <sup>23</sup>CeRePP, Tenon Hospital, F-75020 Paris, France.
- <sup>24</sup>Sorbonne Universite, GRC n°5 , AP-HP, Tenon Hospital, 4 rue de la Chine, F-75020 Paris, France
- <sup>25</sup>Department of Molecular Medicine, Aarhus University Hospital, Palle Juul-Jensen Boulevard 99, 8200 Aarhus N, Denmark
- <sup>26</sup>Department of Clinical Medicine, Aarhus University, DK-8200 Aarhus N
- <sup>27</sup>Department of Medical Genetics, Oslo University Hospital, 0424 Oslo, Norway
- <sup>28</sup>Nuffield Department of Surgical Sciences, University of Oxford, Room 6603, Level 6, John Radcliffe Hospital, Headley Way, Headington, Oxford, OX3 9DU, UK
- <sup>29</sup>University of Cambridge, Department of Oncology, Box 279, Addenbrooke's Hospital, Hills Road, Cambridge CB2 0QQ, UK
- <sup>30</sup>Cancer Research UK, Cambridge Research Institute, Li Ka Shing Centre, Cambridge, CB2 0RE, UK
- <sup>31</sup>Nuffield Department of Surgical Sciences, University of Oxford, Oxford, OX1 2JD, UK
- <sup>32</sup>Faculty of Medical Science, University of Oxford, John Radcliffe Hospital, Oxford, UK
- <sup>33</sup>Population Health Sciences, Bristol Medical School, University of Bristol, BS8 2PS, UK
- <sup>34</sup>Cancer Epidemiology Unit, Nuffield Department of Population Health, University of Oxford, Oxford, OX3 7LF, UK
- <sup>35</sup>Dept. of Surgical Oncology, Princess Margaret Cancer Centre, Toronto ON M5G 2M9, Canada
- <sup>36</sup>Dept. of Surgery (Urology), University of Toronto, Canada
- <sup>37</sup>Department of Preventive Medicine, Keck School of Medicine, University of Southern California/Norris Comprehensive Cancer Center, Los Angeles, CA 90015, USA
- <sup>38</sup>Department of Radiation Oncology and Department of Genetics and Genomic Sciences, Box 1236, Icahn School of Medicine at Mount Sinai, One Gustave L. Levy Place, New York, NY 10029, USA
- <sup>39</sup>Centre for Cancer Biomarker and Biotherapeutics, Barts Cancer Institute, Queen Mary University of London, John Vane Science Centre, Charterhouse Square, London, EC1M 6BQ, UK
- <sup>40</sup>Cancer Epidemiology Division, Cancer Council Victoria, 615 St Kilda Road, Melbourne, VIC 3004, Australia
- <sup>41</sup>Centre for Epidemiology and Biostatistics, Melbourne School of Population and Global Health, The University of Melbourne, Grattan Street, Parkville, VIC 3010, Australia
- <sup>42</sup>Precision Medicine, School of Clinical Sciences at Monash Health, Monash University, Clayton, Victoria 3168, Australia
- <sup>43</sup>Division of Urologic Surgery, Brigham and Womens Hospital, 75 Francis Street, Boston, MA 02115, USA
- <sup>44</sup>Fundación Pública Galega Medicina Xenómica, Santiago de Compostela, 15706, Spain.
- <sup>45</sup>Instituto de Investigación Sanitaria de Santiago de Compostela, Santiago de Compostela, 15706, Spain.
- <sup>46</sup>Centro de Investigación en Red de Enfermedades Raras (CIBERER), Spain
- <sup>47</sup>ISGlobal, Barcelona, Spain
- <sup>48</sup>IMIM (Hospital del Mar Medical Research Institute), Barcelona, Spain
- <sup>49</sup>Universitat Pompeu Fabra (UPF), Barcelona, Spain
- <sup>50</sup>CIBER Epidemiología y Salud Pública (CIBERESP), 28029 Madrid, Spain
- <sup>51</sup>Channing Division of Network Medicine, Department of Medicine, Brigham and Women's Hospital/Harvard Medical School, Boston, MA 02115, USA
- <sup>52</sup>Department of Cancer Epidemiology, Moffitt Cancer Center, 12902 Magnolia Drive, Tampa, FL 33612,

## USA

<sup>53</sup>Division of Public Health Sciences, Fred Hutchinson Cancer Research Center, Seattle, Washington, 98109-1024, USA

<sup>54</sup>Department of Epidemiology, School of Public Health, University of Washington, Seattle, Washington 98195, USA

<sup>55</sup>International Hereditary Cancer Center, Department of Genetics and Pathology, Pomeranian Medical University, 70-115 Szczecin, Poland

<sup>56</sup>Faculty of Health and Medical Sciences, University of Copenhagen, 2200 Copenhagen, Denmark

<sup>57</sup>Department of Clinical Biochemistry, Herlev and Gentofte Hospital, Copenhagen University Hospital, Herlev, 2200 Copenhagen, Denmark

<sup>58</sup>Division of Clinical Epidemiology and Aging Research, German Cancer Research Center (DKFZ), D-69120, Heidelberg, Germany

<sup>59</sup>German Cancer Consortium (DKTK), German Cancer Research Center (DKFZ), D-69120 Heidelberg, Germany

<sup>60</sup>Division of Preventive Oncology, German Cancer Research Center (DKFZ) and National Center for Tumor Diseases (NCT), Im Neuenheimer Feld 460, 69120 Heidelberg, Germany

<sup>61</sup>Humangenetik Tuebingen, Paul-Ehrlich-Str 23, D-72076 Tuebingen, Germany

<sup>62</sup>The University of Texas M. D. Anderson Cancer Center, Department of Genitourinary Medical Oncology, 1515 Holcombe Blvd., Houston, TX 77030, USA

<sup>63</sup>Departments of Epidemiology & Population Health and of Medicine, Division of Oncology, Stanford Cancer Institute, Stanford University School of Medicine, Stanford, CA 94304 USA

<sup>64</sup>Department of Laboratory Genetics, Portuguese Oncology Institute of Porto (IPO Porto) / Porto Comprehensive Cancer Center, Porto, Portugal

<sup>65</sup>Cancer Genetics Group, IPO Porto Research Center (CI-IPOP) / RISE@CI-IPOP (Health Research Network), Portuguese Oncology Institute of Porto (IPO Porto) / Porto Comprehensive Cancer Center, Porto, Portugal

<sup>66</sup>School of Medicine and Biomedical Sciences (ICBAS), University of Porto, Porto, Portugal

<sup>67</sup>Department of Population Sciences, Beckman Research Institute of the City of Hope, 1500 East Duarte Road, Duarte, CA 91010

<sup>68</sup>Ghent University, Faculty of Medicine and Health Sciences, Basic Medical Sciences, Proeftuinstraat 86, B-9000 Gent

<sup>69</sup>Department of Surgery, Faculty of Medicine, University of Malaya, 50603 Kuala Lumpur, Malaysia

<sup>70</sup>Department of Urology, University of Washington, 1959 NE Pacific Street, Box 356510, Seattle, WA 98195, USA

<sup>71</sup>Institute of Human Genetics, University Medical Center Hamburg-Eppendorf, D-20246 Hamburg, Germany

<sup>72</sup>Molecular Medicine Center, Department of Medical Chemistry and Biochemistry, Medical University of Sofia, Sofia, 2 Zdrave Str., 1431 Sofia, Bulgaria

<sup>73</sup>Department of Oncology, Cross Cancer Institute, University of Alberta, 11560 University Avenue, Edmonton, Alberta, Canada T6G 1Z2

<sup>74</sup>Division of Radiation Oncology, Cross Cancer Institute, 11560 University Avenue, Edmonton, Alberta, Canada T6G 1Z2

<sup>75</sup>Molecular Endocrinology Laboratory, Department of Cellular and Molecular Medicine, KU Leuven, BE-3000, Belgium

<sup>76</sup>Division of Cancer Sciences, Manchester Cancer Research Centre, Faculty of Biology, Medicine and Health, Manchester Academic Health Science Centre, NIHR Manchester Biomedical Research Centre, Health Innovation Manchester, University of Manchester, M13 9WL

<sup>77</sup>The University of Surrey, Guildford, Surrey, GU2 7XH, UK

<sup>78</sup>Genetic Oncology Unit, CHUVI Hospital, Complejo Hospitalario Universitario de Vigo, Instituto de Investigación Biomédica Galicia Sur (IISGS), 36204, Vigo (Pontevedra), Spain

<sup>79</sup>Department of Urology, Erasmus University Medical Center, Cancer Institute, 3015 GD Rotterdam, The Netherlands

<sup>80</sup>"Exposome and Heredity", CESP (UMR 1018), Faculté de Médecine, Université Paris-Saclay, Inserm, Gustave Roussy, Villejuif

<sup>81</sup>Clinical Gerontology Unit, University of Cambridge, Cambridge, CB2 2QQ, UK

<sup>82</sup>Division of Epidemiology, Department of Internal Medicine, University of Utah School of Medicine, Salt Lake City, Utah 84132, USA

<sup>83</sup>George E. Wahlen Department of Veterans Affairs Medical Center, Salt Lake City, Utah 84148, USA

<sup>84</sup>Department of Laboratory Medicine and Pathology, Mayo Clinic, Rochester, MN 55905, USA

<sup>85</sup>Nuffield Department of Population Health, University of Oxford, United Kingdom

<sup>86</sup>Program in Genetic Epidemiology and Statistical Genetics, Department of Epidemiology, Harvard School of Public Health, Boston, MA, USA

<sup>87</sup>Division of Epidemiology, Department of Medicine, Vanderbilt University Medical Center, 2525 West End Avenue, Suite 800, Nashville, TN 37232 USA.

<sup>88</sup>International Epidemiology Institute, Rockville, MD 20850, USA

<sup>89</sup>Department of Epidemiology and Biostatistics, School of Public Health, Imperial College London, SW7 2AZ, UK

## **Acknowledgements for PRACTICAL Consortium**

### CRUK and PRACTICAL consortium

This work was supported by the Canadian Institutes of Health Research, European Commission's Seventh Framework Programme grant agreement n° 223175 (HEALTH-F2-2009-223175), Cancer Research UK Grants C5047/A7357, C1287/A10118, C1287/A16563, C5047/A3354, C5047/A10692, C16913/A6135, and The National Institute of Health (NIH) Cancer Post-Cancer GWAS initiative grant: No. 1 U19 CA 148537-01 (the GAME-ON initiative).

We would also like to thank the following for funding support: The Institute of Cancer Research and The Everyman Campaign, The Prostate Cancer Research Foundation, Prostate Research Campaign UK (now PCUK), The Orchid Cancer Appeal, Rosetrees Trust, The National Cancer Research Network UK, The National Cancer Research Institute (NCRI) UK. We are grateful for support of NIHR funding to the NIHR Biomedical Research Centre at The Institute of Cancer Research, The Royal Marsden NHS Foundation Trust, and Manchester NIHR Biomedical Research Centre. The Prostate Cancer Program of Cancer Council Victoria also acknowledge grant support from The National Health and Medical Research Council, Australia (126402, 209057, 251533, , 396414, 450104, 504700, 504702, 504715, 623204, 940394, 614296.), VicHealth, Cancer Council Victoria, The Prostate Cancer Foundation of Australia, The Whitten Foundation, PricewaterhouseCoopers, and Tattersall's. EAO, DMK, and EMK acknowledge the Intramural Program of the National Human Genome Research Institute for their support.

Genotyping of the OncoArray was funded by the US National Institutes of Health (NIH) [U19 CA 148537 for ELucidating Loci Involved in Prostate cancer SuscEptibility (ELLIPSE) project and X01HG007492 to the Center for Inherited Disease Research (CIDR) under contract number HHSN268201200008I]. Additional analytic support was provided by NIH NCI U01 CA188392 (PI: Schumacher).

Research reported in this publication also received support from the National Cancer Institute of the National Institutes of Health under Award Numbers U10 CA37429 (CD Blanke), and UM1 CA182883 (CM Tangen/IM Thompson). The content is solely the responsibility of the authors and does not necessarily represent the official views of the National Institutes of Health.

Funding for the iCOGS infrastructure came from: the European Community's Seventh Framework Programme under grant agreement n° 223175 (HEALTH-F2-2009-223175) (COGS), Cancer Research UK (C1287/A10118, C1287/A 10710, C12292/A11174, C1281/A12014, C5047/A8384, C5047/A15007, C5047/A10692, C8197/A16565), the National Institutes of Health (CA128978) and Post-Cancer GWAS initiative (1U19 CA148537, 1U19 CA148065 and 1U19 CA148112 - the GAME-ON initiative), the Department of Defence (W81XWH-10-1-0341), the Canadian Institutes of Health Research (CIHR) for the CIHR Team in Familial Risks of Breast Cancer, Komen Foundation for the Cure, the Breast Cancer Research Foundation, and the Ovarian Cancer Research Fund.

### BPC3

The BPC3 was supported by the U.S. National Institutes of Health, National Cancer Institute (cooperative agreements U01-CA98233 to D.J.H., U01-CA98710 to S.M.G., U01-CA98216 to E.R., and U01-CA98758 to B.E.H., and Intramural Research Program of NIH/National Cancer Institute, Division of Cancer Epidemiology and Genetics).

### CAPS

CAPS GWAS study was supported by the Cancer Risk Prediction Center (CRisP; [www.crispcenter.org](http://www.crispcenter.org)), a Linneus Centre (Contract ID 70867902) financed by the Swedish Research Council, (grant no K2010-70X-20430-04-3), the Swedish Cancer Foundation (grant no 09-0677), the Hedlund Foundation, the Soederberg Foundation, the Enqvist Foundation, ALF funds from the Stockholm County Council. Stiftelsen Johanna Hagstrand och Sigfrid Linner's Minne, Karlsson's Fund for urological and surgical research.

### PEGASUS

PEGASUS was supported by the Intramural Research Program, Division of Cancer Epidemiology and Genetics, National Cancer Institute, National Institutes of Health.
