# Supplementary material
Source: PubMed Central journal article supplement (PMC10432188)
Supplement: mmc5.pdf [file mmc5.pdf]

# Combined CRISPRi and proteomics screening reveal a cohesin-CTCF-bound allele contributing to increased expression of *RUVBL1* and prostate cancer progression

## Graphical abstract

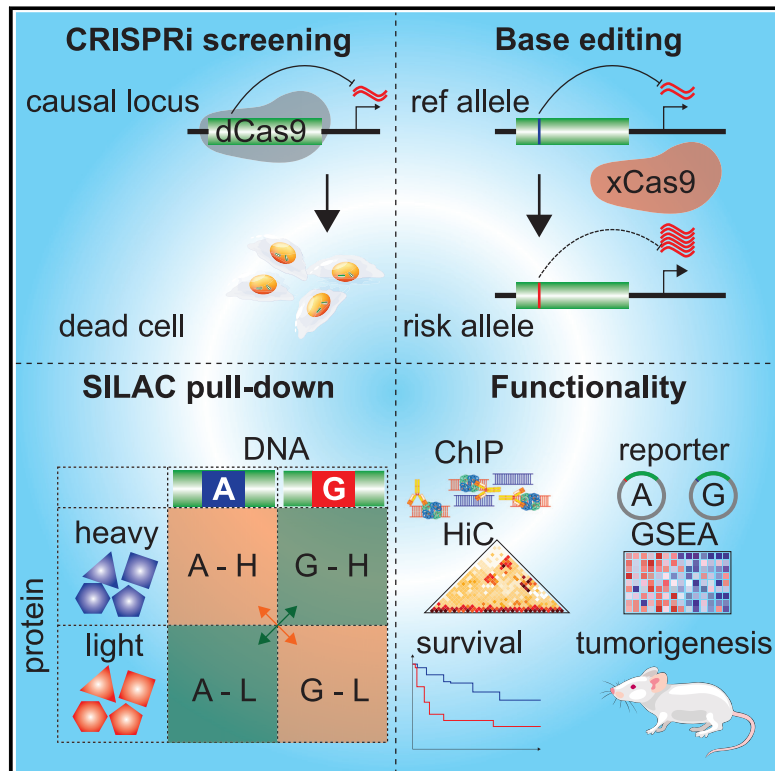

## Authors

Yijun Tian, Dandan Dong, Zixian Wang, ..., the PRACTICAL consortium, Gong-Hong Wei, Liang Wang

## Correspondence

[gonghong\\_wei@fudan.edu.cn](mailto:gonghong_wei@fudan.edu.cn) (G.-H.W.),  
[liang.wang@moffitt.org](mailto:liang.wang@moffitt.org) (L.W.)

**A major goal of post-GWAS studies is to functionally characterize causal SNPs that confer increased risk to disease phenotypes. Here, we applied CRISPRi and proteomics screening to identify regulatory SNPs at prostate-cancer risk loci and functionally characterized the impact of the rs60464856-*RUVBL1* locus via *in vitro* and *in vivo* approaches.**

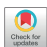

# Combined CRISPRi and proteomics screening reveal a cohesin-CTCF-bound allele contributing to increased expression of *RUVBL1* and prostate cancer progression

Yijun Tian,<sup>1,9</sup> Dandan Dong,<sup>2,9</sup> Zixian Wang,<sup>2,3,4</sup> Lang Wu,<sup>5</sup> Jong Y. Park,<sup>6</sup> the PRACTICAL consortium, Gong-Hong Wei,<sup>2,3,4,7,8,\*</sup> and Liang Wang<sup>1,\*</sup>

## Summary

Genome-wide association studies along with expression quantitative trait locus (eQTL) mapping have identified hundreds of single-nucleotide polymorphisms (SNPs) and their target genes in prostate cancer (PCa), yet functional characterization of these risk loci remains challenging. To screen for potential regulatory SNPs, we designed a CRISPRi library containing 9,133 guide RNAs (gRNAs) to cover 2,166 candidate SNP loci implicated in PCa and identified 117 SNPs that could regulate 90 genes for PCa cell growth advantage. Among these, rs60464856 was covered by multiple gRNAs significantly depleted in screening (FDR < 0.05). Pooled SNP association analysis in the PRACTICAL and FinnGen cohorts showed significantly higher PCa risk for the rs60464856 G allele (p value =  $1.2 \times 10^{-16}$  and  $3.2 \times 10^{-7}$ , respectively). Subsequent eQTL analysis revealed that the G allele is associated with increased *RUVBL1* expression in multiple datasets. Further CRISPRi and xCas9 base editing confirmed that the rs60464856 G allele leads to elevated *RUVBL1* expression. Furthermore, SILAC-based proteomic analysis demonstrated allelic binding of cohesin subunits at the rs60464856 region, where the HiC dataset showed consistent chromatin interactions in prostate cell lines. *RUVBL1* depletion inhibited PCa cell proliferation and tumor growth in a xenograft mouse model. Gene-set enrichment analysis suggested an association of *RUVBL1* expression with cell-cycle-related pathways. Increased expression of *RUVBL1* and activation of cell-cycle pathways were correlated with poor PCa survival in TCGA datasets. Our CRISPRi screening prioritized about one hundred regulatory SNPs essential for prostate cell proliferation. In combination with proteomics and functional studies, we characterized the mechanistic role of rs60464856 and *RUVBL1* in PCa progression.

## Introduction

Among all cancer types, prostate cancer (PCa) accounted for 26% of 970,250 new cancer cases and caused 11% of 319,420 cancer-related deaths in US males in 2021.<sup>1</sup> As a cancer type with strong genetic predispositions, PCa has been extensively investigated in genome-wide association studies (GWASs)<sup>2</sup> in which researchers aim to determine susceptible variants associated with increased disease risk and aggressiveness.<sup>2,3</sup> It has been reported that the contribution of GWAS-identified loci to PCa risk is nearly 20%.<sup>4</sup> Although GWASs have been highly productive, only a few risk loci have been functionally characterized.<sup>5–8</sup> Thus far, because these risk single-nucleotide polymorphisms (SNPs) are found in non-coding portions of the genome, it is believed that many of them (or their closely linked SNPs) alter the activities of regulatory elements and quantitatively change gene expression rather than directly mutating protein sequences.<sup>9–12</sup> With tremendous large-scale GWAS findings, especially those of high reproducibility, it is believed that some non-coding variants play a subtle but profound role in PCa initiation, progression,

and metastasis by modulating the expression of discrete susceptibility genes.

To dissect functional variants and their target genes in PCa, researchers apply bioinformatic and benchtop approaches to prioritize and validate the causal variants.<sup>13–15</sup> Curated databases such as ChIP-atlas,<sup>16</sup> ENCODE,<sup>17</sup> JASPAR,<sup>18</sup> and GTEx<sup>19</sup> provide abundant resources for estimating the genetic contribution of GWAS variants to PCa and other cancer susceptibilities. However, large-scale genetic assays are often needed for interrogation of endogenous variant loci and direct characterization of consequent phenotype changes to determine the biological effect.<sup>20–22</sup> One such assay is lentiviral-based Cas9-mediated screening, which has emerged as a powerful tool for evaluating the biological significance of genes of interest on a large scale.<sup>23,24</sup> Compared with canonical wild-type Cas9-based screening, dead Cas9 (dCas9) forms steric hindrance according to the gRNA sequence and induces transcription repression if fused to repressor peptides KRAB (Krüppel-associated box). dCas9-KRAB can specifically decrease target gene expression without strand cleavage and is used for screening regulatory elements in mammalian cells.<sup>25,26</sup>

<sup>1</sup>Department of Tumor Biology, H. Lee Moffitt Cancer Center and Research Institute, 12902 Magnolia Drive, Tampa, FL 33612, USA; <sup>2</sup>MOE Key Laboratory of Metabolism and Molecular Medicine, Shanghai Medical College of Fudan University, Shanghai, China; <sup>3</sup>Department of Biochemistry and Molecular Biology of School of Basic Medical Sciences, Shanghai Medical College of Fudan University, Shanghai, China; <sup>4</sup>Fudan University Shanghai Cancer Center, Shanghai Medical College of Fudan University, Shanghai, China; <sup>5</sup>Population Sciences in the Pacific Program, University of Hawaii Cancer Center, University of Hawaii at Manoa, Honolulu, HI 96813, USA; <sup>6</sup>Department of Cancer Epidemiology, H. Lee Moffitt Cancer Center and Research Institute, Tampa, FL 33612, USA; <sup>7</sup>Disease Networks Research Unit, Biocenter Oulu, University of Oulu, Oulu, Finland; <sup>8</sup>Faculty of Biochemistry and Molecular Medicine, University of Oulu, Oulu, Finland

<sup>9</sup>These authors contributed equally

\*Correspondence: [gonghong\\_wei@fudan.edu.cn](mailto:gonghong_wei@fudan.edu.cn) (G.-H.W.), [liang.wang@moffitt.org](mailto:liang.wang@moffitt.org) (L.W.)

<https://doi.org/10.1016/j.ajhg.2023.07.003>

© 2023 American Society of Human Genetics.

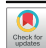

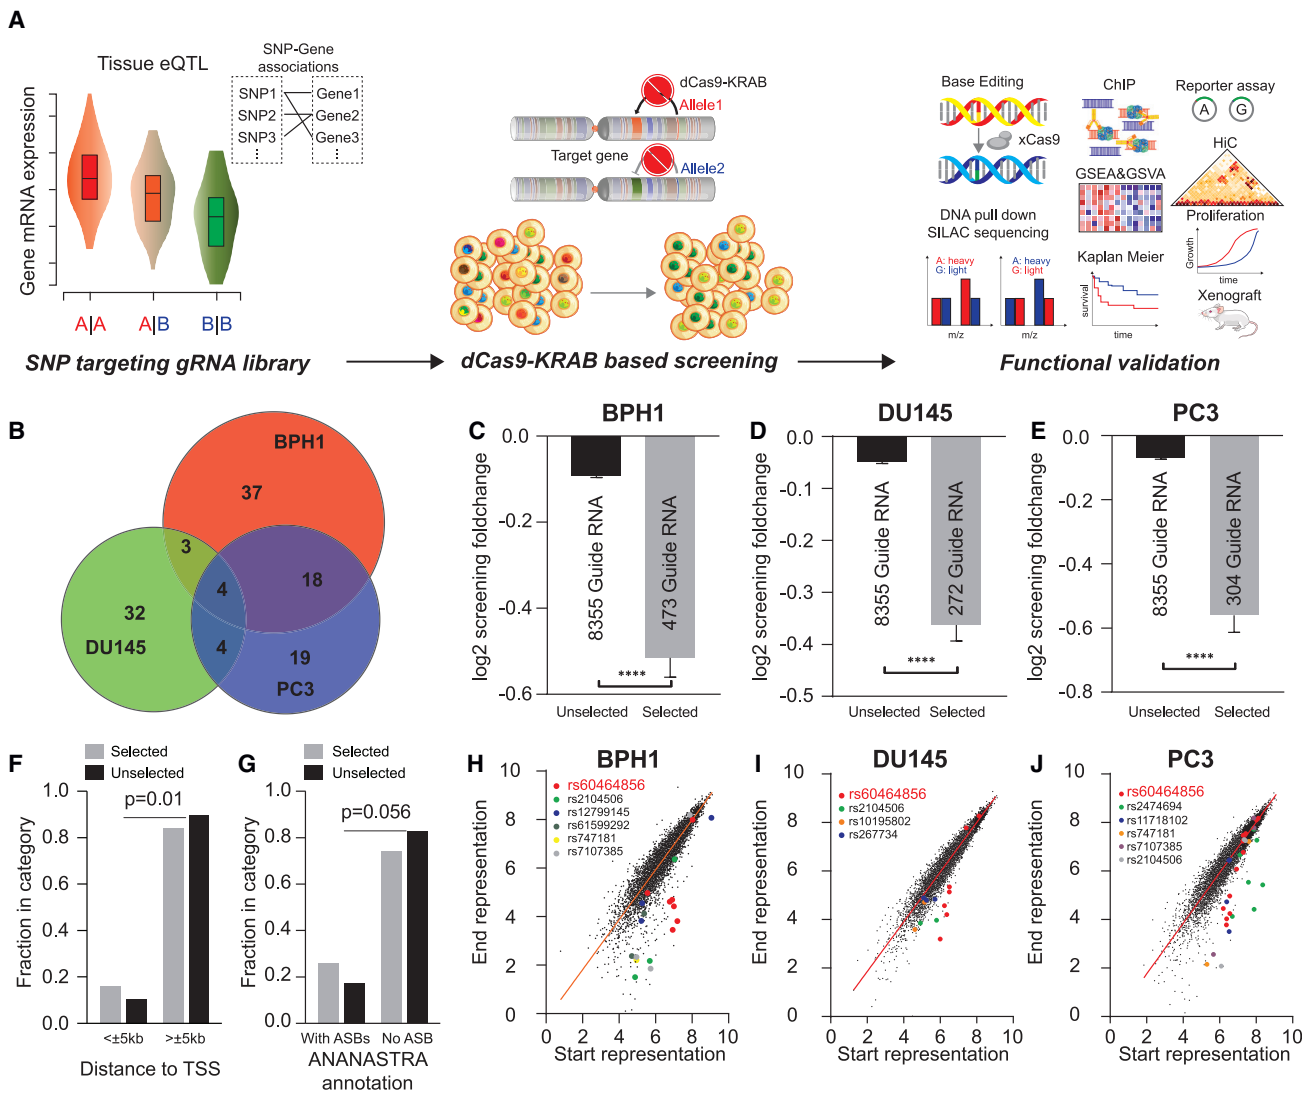

**Figure 1. CRISPRi screening in prostate cell lines decodes regulatory SNPs from eQTL analyses**

(A) Study design of the current project, including eQTL target selection, CRISPRi screening, and functional validation.

(B) Overall SNP candidates in BPH1 (red), DU145 (green), and PC3 (blue) cells over 3-week screening.

(C–E) Comparison of the gRNA fold change between the selected and unselected SNPs in BPH1 (C), DU145 (D), and PC3 (E) cells. The gRNA fold change was calculated from the average of the two biological replicates. The bar represents the standard error of the fold changes within each category.

(F) Enrichment of the selected compared to unselected SNPs in transcription start sites (TSSs).

(G) Enrichment of the selected compared to unselected SNPs in allele-specific binding (ASB) annotation according to the ANANASTRA database.

(H–J) Demonstration of gRNA representation for the selected SNPs in BPH1 (H), DU145 (I), and PC3 (J) cells. gRNAs targeting the main validation SNP rs60464856 are highlighted in red.

Most SNPs are believed to function as regulatory switches in the human genome. With the eliminated nuclease activity,<sup>26</sup> we hypothesized that dCas9-based CRISPRi could be used to interfere with regulatory sequences at SNP loci and faithfully mimic the transcription alteration caused by single-base differences. To test this hypothesis, we first established multiple stable dCas9-KRAB prostate cell lines and designed an unbiased, highly reproducible gRNA library that targeted candidate SNPs at PCa risk loci. We then performed negative selection for potential SNPs conferring a growth advantage. Finally, we provided a detailed analysis of an SNP-gene pair for its functional role by using prostate cell

lines and a mouse model and performed a successful proteomics identification of transcriptional regulators that mediate the variant's regulatory change. (Figure 1A) Our results support the use of CRISPRi-based approaches at disease risk loci for regulatory SNP screening.

## Methods

### eQTL-based SNP selection at prostate-cancer risk loci

The rationale for the regulatory screening is explained in Figures S1A and S1B. In brief, to select candidate SNPs, we first retrieved *cis*-eQTL data from our benign prostate tissues<sup>27</sup> and

identified all SNPs with gene-wise  $FDR \leq 1 \times 10^{-3}$ . We then applied ENCODE annotations (including histone modification, common transcription factor binding, and DNase hypersensitivity in prostate cell lines) to filter for candidate functional SNPs.

### gRNA selection and library pool amplification for candidate SNPs

To design gRNAs for the candidate SNPs, we retrieved DNA sequences surrounding each SNP ( $\pm 23$ bp). We used the CRISPOR program (<http://crispor.tefor.net/>) for in-silico selection. We assembled the gRNA oligo pool into the lentiGuide-Puro (RRID: Addgene\_52963) backbone and transformed the pooled oligos into highly sensitive Endura ElectroCompetent Cells (Lucigen) to generate plasmid libraries.

### dCas9/KRAB stable cell lines and gRNA library processing

To establish stable cell lines, we packaged lenti-dCas9-KRAB-blast (RRID: Addgene\_89567) into lentiviral particles with HEK293FT cells and used 10-fold concentrated virus particles to transduce several human cells, including RWPE1, BPH1, 22Rv1, PC3, DU145 and HEK293FT cell lines. After blasticidin selection, stable dCas9 expression was verified with immunoblots. The gRNA virus library (packaged from lentiGuide-Puro) was titrated in three dCas9 stable prostate cell lines, including BPH1 (originated from benign prostatic hyperplasia), DU145 (originated from prostatic brain metastasis) and PC3 (originated from prostatic bone metastasis) for the screening. We excluded RWPE1 because the serum-free culture condition conflicts with the virus supernatant, and we excluded 22Rv1 because the small cell size influenced the accuracy of cell counting during screening. To achieve low multiplicity of infection (MOI), we optimized the cell number and virus amount over 72-h puromycin selection, such that the non-infected group would be eliminated by 95%–99%, whereas the library group retained 30%–40% viability. The cell viability was measured with the CellTiter-Glo Luminescent Cell Viability Assay (Promega G7570). After confirming low MOI integration, we removed puromycin from the medium and continued the cell culture for 21 days. We isolated genomic DNA at baseline D1 (day 1) and endpoint D21 (day 21).

### gRNA readout sequencing

We used the Illumina HiSeq platform to sequence the gRNA readout amplicons. We aimed for at least a 500-fold library size depth for each replicate to ensure quantification accuracy.

### Data QC and analysis

To quantify the representation of each gRNA, we used a Python script “count\_spacer.py” developed by Feng Zhang’s lab to scan the FASTQ file for perfectly matched hits and generate raw read counts for each experiment. We then used principal-component analysis (PCA) to evaluate the similarity of the plasmid library, baseline, and screening endpoint gRNA representation. To determine SNP alleles conferring growth advantage in these cell lines, we used RIGER (RNAi gene enrichment ranking) extension (<https://software.broadinstitute.org/GENE-E/extensions.html>) to calculate a rank list for SNPs or alleles with the most depleted gRNA representation.<sup>28</sup> The RIGER program ranks gRNAs according to their depletion effects and then identifies the SNP targeted by the shRNAs.

### Plasmid construction and siRNA design

To enable fluorescence-based cell sorting, we assembled copGFP ORF into base editor plasmid<sup>29</sup> xCas9(3.7)-ABE(7.10) (RRID: Addgene\_108382) with NEBuilder HiFi DNA Assembly Master Mix (New England Biolabs). A 223-bp flanking sequencing surrounding rs60464856 was amplified from RWPE1 cells (rs60464856 heterozygote) and further subcloned into the pGL3-basic vector between NheI and XhoI sites with NEBuilder HiFi DNA Assembly Master Mix. Small hairpin RNA (shRNA) targeting *RUVBL1*, primers, and gRNA sequences are listed in Table S1.

### Reagents and cell culture

Antibody against Cas9 protein (844302) was purchased from BioLegend. Antibody against *RUVBL1* (10210-2-AP) was purchased from Proteintech. Antibody against  $\beta$ -actin (4970) was purchased from Cell Signaling Technology. SMC3 (ab9263), H3K4me1 (ab8895), and IgG isotype control antibodies (ab171870 for rabbit, ab37355 for mouse) were purchased from Abcam. SMC1A (61067), CTCF (61311), and H3K27ac (39034) antibodies were purchased from Active Motif. CTCFL (MABE1125) and H3K4me3 (c15410003) antibodies were purchased from Sigma-Aldrich and Diagenode, respectively. DU145 (CVCL\_0105), PC3 (RRID: CVCL\_0035), 22Rv1 (RRID: CVCL\_1045), and RWPE1 (RRID: CVCL\_3791) cells were obtained from the ATCC. BPH1 (RRID: CVCL\_1091) cells were purchased from Sigma-Aldrich. HEK293FT cells (RRID: CVCL\_6911) were purchased from Thermo Fisher Scientific. Cell lines were disposed of and replaced with low passage aliquots after being subcultured 15 times. Unless specified otherwise, all cell culture reagents were obtained from ThermoFisher Scientific. BPH1, DU145, PC3, and 22Rv1 cells were grown in RPMI1640 medium supplemented with 10% fetal bovine serum (FBS). HEK293FT cells were grown in DMEM medium supplemented with 10% FBS and 500  $\mu$ g/mL geneticin selective antibiotics. RWPE1 cells were grown in Keratinocyte Serum-Free Medium. All cell lines were examined for mycoplasma contamination with Venor GeM Mycoplasma Detection Kit (Sigma-Aldrich).

### CRISPR base editing

To change the rs60464856 A allele to G allele, we created a GFP-labeled xCas9(3.7)-ABE(7.10) plasmid based on the backbone from David Liu’s lab.<sup>29</sup> A gRNA template was synthesized in a gblock fragment with an hU6 promoter and a scaffold (<https://benchling.com/protocols/10T3UWfo/detailed-gblocks-based-crispr-protocol>). Because rs60464856 is located in the base editing window, the adenine base editor can be directed to the SNP site and catalyze A into the G allele. We co-transfected 2.5  $\mu$ g xCas9(3.7)-ABE7.10 plasmid and 1.2  $\mu$ g gRNA gblock into cells 80% confluent in each well of the six-well plate. After 48 h, GFP-positive cells were sorted by flow cytometry and collected for allele dosage quantification. The GFP-positive cells were seeded into single clones once editing efficiencies were above 5%. After expanding the single clones for ten days, we used amplification-refractory mutation system (ARMS) PCR for genotyping from the direct lysate. We also used Sanger sequencing to verify the germline change of each single clone.

### Real-time PCR and immunoblot analysis

Total RNA was extracted from cells via the Direct-zol RNA Mini-prep Kit (Zymo Research). One microgram of total RNA was reverse transcribed by iScript cDNA Synthesis Kit (BioRad). Quantification

reactions were performed with PowerUp SYBR Green Master Mix (Thermo Fisher Scientific) on the CFX96 Touch real-time PCR system (BioRad). The primers are listed in Table S1. Total protein was extracted and electrophoresed as described previously;<sup>30</sup> minor modification was performed with Mini-PROTEAN Precast Gels (BioRad). SuperSignal West Pico Chemiluminescent Substrate (Thermo Fisher Scientific) produced luminescent signals on the LICOR imaging system. Captured images were aligned in Photoshop and assembled in Illustrator.

### Luciferase reporter assay

The cells were seeded into a 24-well plate. After 12 to 16 h, Lipofectamine 3000 was used for transfecting 500 ng of pGL3 reporter plasmids to each well. The media were replaced after transfection for 24 h. After 48 h of transfection, the cells were lysed for the luciferase assay according to the Dual-Luciferase Reporter Assay (E1960, Promega) protocol. The luminescence signals were measured with the GlowMax plate reader. After normalization to *Renilla* luciferase readout, relative firefly luciferase activities driven by corresponding promoters were represented by fold changes in luminescence.

### HiC data analysis

We downloaded the processed data for DU145, PC3, VCaP, and LNCaP cells from the GSE172099<sup>31</sup> supplementary file collection and used the ICED (iterative correction and eigenvector decomposition) normalized data matrix for visualization and analysis. We used a 20 kb bin for DU145 and PC3 cells and a 40 kb bin for VCaP and LNCaP cells; these sizes are the smallest bin size in the processed data. We used PERL modules from the existing pipeline cworld-dekker (<https://github.com/dekkerlab/cworld-dekker>) to generate the heatmap and to sub-slice the ICED data matrix. For demonstration convenience, we highlighted the method to calculate the left-to-right ratio (L/R) in Figures S6A–S6E. After visualizing the heatmap, we decided to focus on two hotspots surrounding the rs60464856 locus (chr3: 127840001–127860000 [hg19]) in DU145 and PC3 cells, including three 20-kb bins on the left (chr3: 127780001–127800000 [hg19] to chr3: 127820001–127840000 [hg19]) and three 20-kb bins on the right (chr3: 12786000–127880000 [hg19] to chr3: 127900001–127920000 [hg19]), both interacting with a distant ten 20-kb-bin region near the 3-prime end of *RPN1* (chr3: 128120001–128140000 [hg19] to chr3: 128300001–128320000 [hg19]). We aggregated the ICED count in the hotspot and divided the left to the right to obtain the L/R ratio in each cell line. For VCaP and LNCaP, we applied the same strategy to calculate the L/R ratio, except for the larger bin size included for each interaction spot. Because the bin count for each hotspot was arbitrarily decided, we also calculated the L/R ratio for different options in Figure S6E. The results showed that the current selection represents an average estimation among the multiple options.

### Allele-specific proteomics screening with stable isotope labeling by amino acid in cell culture (SILAC)

The BPH1, DU145, and PC3 cells were grown in SILAC RPMI 1640 medium (ThermoFisher 88365) for five passages before cells were harvested for nuclear protein extraction (Active Motif 40010). After confirming that heavy amino acid labeling efficiency reached 99.9%, we applied the nuclear extracts to the desalting spin column (ThermoFisher 89882) to remove excessive ions. The DNA baits harboring rs60464856 A and G alleles were produced according to methods in a previous publication.<sup>32</sup> For each binding reaction, 2  $\mu$ g of purified DNA baits were conjugated to 25  $\mu$ L Strepta-

vidin Dynabeads (ThermoFisher 65001). The clean conjugated beads were incubated with 12.5  $\mu$ L precleared nuclear protein at 4° overnight. The incubated beads were washed five times and combined for two parallel quantitative-mass-spectrometry runs to provide the allelic protein binding ratio. Qualified proteins with allelic binding were defined as (1) concordant allele ratio changes:  $\log_2(A/G) \times \log_2(G/A) < 0$  and (2) drastic allele ratio differences:  $|\log_2(A/G) - \log_2(G/A)| \geq 2$ . For proteins with allelic hits, we further narrowed them down to those with known DNA binding functions according to UniProt databases (<https://www.uniprot.org/>).<sup>33</sup>

### Chromatin immunoprecipitation qPCR assays

Because the rs60464856 locus was demonstrated to reside in an insulation region in an analysis of previously published Hi-C data, we adapted our chromatin immunoprecipitation (ChIP) qPCR protocols for chromosome conformation capturing.<sup>34</sup> Compared with conventional ChIP assay protocol, our protocol applied dual cross-linking to maximally preserve chromatin contacts.<sup>35</sup> Each ChIPed DNA sample was tested in four qPCR reactions, including (1) rs60464856 locus enrichment primer pair amplifying a 223-bp fragment centering on rs60464856; (2) rs60464856 locus control primer pair amplifying a 183-bp fragment 2.5 kb upstream to the SNP; (3) rs60464856 A allele-specific primer pair; and (4) rs60464856 G allele-specific primer pair. To quantify the histone modification profiling in the subclones, we performed ChIP reactions with H3K4me1, H3K4me3, and H3K27ac antibodies and quantified the rs60464856 locus enrichment over the upstream control primer. We further normalized the fold change against the input DNA to obtain an enrichment score for each modification.

### RNA-seq and gene set enrichment analysis (GSEA)

Total RNA sample was extracted with the Zymo Direct-zol micro-prep kit, with the on-column DNase digestion step included. The mRNA was purified from total RNA via poly-T oligo-attached magnetic beads. After fragmentation, the first-strand cDNA was synthesized with random hexamer primers followed by the second-strand cDNA synthesis. The library was ready after end repair, A-tailing, adapter ligation, size selection, amplification, and purification. A total of 6G genomic data were targeted for each sample, which guaranteed roughly 20 million 150 bp paired-end RNA reads. The FASTQ file was trimmed with cutadapt and quantified with the RSEM package<sup>36</sup> for gene expression. To determine which pathway was associated with *RUVBL1* expression, we used interactive GSEA software<sup>37</sup> to find which gene set showed statistically significant enrichment. For the TCGA prostate cancer tissue, we used the FPKM data from the NCI GDC data portal for the GSEA analysis.

### In vivo xenograft mouse model

Animal experiments were performed according to the protocol approved by the Institutional Animal Care and Use Committee of Fudan University. Nude mice (6-week-old males) were purchased from GemPharmatech (Jiangsu, China) and maintained in a pathogen-free environment. PC3 was grown in RPMI1640 containing 10% FBS, 100 U/mL penicillin, and 100  $\mu$ g/mL streptomycin in a humidified CO<sub>2</sub> incubator. Before injection into the mice, the cells were harvested by trypsinization and washed two times with PBS. PC3 cells were then resuspended in 100  $\mu$ L serum-free medium, mixed with 50% Matrigel (BD Biosciences), and injected (5  $\times$  10<sup>6</sup>/site) subcutaneously into the hind flank of

each mouse. Tumor volume was measured with a digital caliper once a week and calculated according to the formula:  $V = (L \times W^2)/2$  ( $L$  = length;  $W$  = width; all parameters are in millimeters). After 4 weeks, the mice were sacrificed, and tumors were taken for weight measurement. Mouse tumor models and protocols were approved by the Animal Experiment Review Board (20210302-071) of the School of Basic Medical Sciences, Fudan University, Shanghai, China.

## Results

### Candidate SNP selection, gRNA searching, and screening library production

We first screened the ENCODE database and identified 2664 SNPs (TARGET) with strong epigenomic signals (Figure S1C). We then applied a Bayesian framework by using summary statistics to calculate a posterior inclusion probability (PIP) to predict SNP functionality. We included five SNPs with the highest PIP score for each eQTL-associated gene as another PIP SNP category ( $n = 194$ ). Finally, we included 641 control SNPs (CTL) that showed strong eQTL signals but without epigenomic features. After removing duplicated SNPs, we selected 3,408 SNPs for gRNA design. We scanned these SNPs with the CRISPOR program and eventually designed 9,133 gRNAs, including 100 control sequences that did not target any genome loci (NCG) (Figure S1D). The exact sequence design can be found in Table S2.

We used immunoblots to confirm stable expression of dCas9 after one month of transduction (Figure S2A). We ensured low MOI infection by measuring gRNA lentiviral library function titer in 72 h (Figure S2B) and visualized a 261-bp gRNA amplicon for each sample on agarose gel for quantification by high-throughput sequencing (Figure S2C). The sequencing summary for each sample is shown in Figure S2D. We also visualized the normalized count in each replicate endpoint and observed high correlations in all three cell lines (Figures S2E–S2G).

### CRISPRi screening identified top candidates of regulatory SNPs

We first performed PCA analysis and found tight clustering between baseline and plasmid libraries (Figure S3A), suggesting faithful representations of original gRNA libraries in transfected cell lines. This analysis also found highly diverse but cell-line-dependent distribution in the end libraries, indicating gRNA profile changes by the selection process. We then normalized the read count by using the total noncount with perfect sequence match in each sample and calculated the fold change by dividing the read count in the end library by the read count in the baseline library. The subsequent RIGER analysis showed 779 gRNAs targeting 117 SNPs with permutation test FDR  $\leq 0.1$  in both replicates (Figure 1B). Further analysis did not find significant correlations between the fold change and gRNA specificity score (Figures S3B–S3D), suggesting minimal off-target effects of these selected gRNAs. When

comparing end and baseline libraries, we found significant gRNA depletion in BPH1, DU145, and PC3 screening experiments (Figures 1C–1E). When comparing relative gRNA changes between different categories of candidate SNPs, we found significantly higher growth depletion only in BPH1 cells with gRNA targeting the PIP and TARGET SNPs (Figures S3E–S3G). We also found that a significantly higher proportion of the SNPs selected as screening hits resided in transcription start sites of human genes (Figure 1F) and tended to be allelically bound to transcriptional-factor binding according to ANANASTRA annotation (Figure 1G).<sup>38</sup> We plotted the gRNA representation before and after the growth selection and highlighted representative SNPs in each cell line (Figures 1H–1J). The raw and normalized gRNA count and the eQTL mapped with the candidate SNP are listed in Table S2. The RIGER analysis output is listed in Table S3.

### rs60464856 displays a regulatory role in *RUVBL1* expression underpinning susceptibility for prostate cancer

Among the 117 SNPs showing significant growth inhibition over a 3-week screening, the SNP rs60464856 was consistently selected in all tested prostate cell lines. The SNP sequence was targeted by ten gRNAs for the A and six gRNAs for the G allele. We observed significant A allele depletion (fold change  $\leq 0.75$ ) in ten gRNAs in BPH1, five gRNAs in DU145, and ten gRNAs in PC3 cells (Figure 2A). rs60464856 is located in a previously identified risk locus, and the G allele was associated with a 10% increased risk of prostate cancer in 107,247 cases and 127,006 controls ( $p$  value =  $1.2 \times 10^{-16}$ ) (Figure 2B).<sup>39</sup> Consistently, a phenome-wide association analysis (PheWAS) in the FinnGen cohort ( $n = 342,499$ ) with 2,202 endpoints revealed the strongest association of rs60464856 with malignant neoplasm of prostate (11,590 cases and 110,189 controls;  $p$  value =  $3.2 \times 10^{-7}$ ) (Figure S4A).<sup>40</sup> We further showed that among the *RUVBL1* eQTL loci, rs60464856 resided in a linkage disequilibrium block with the second-best significance (Figure 2C). Additionally, the rs60464856 G allele was significantly associated with elevated *RUVBL1* expression in GTEx (<https://gtexportal.org/home/>),<sup>19</sup> Mayo,<sup>27,41,42</sup> and TCGA prostate eQTL<sup>43</sup> datasets (Figure 2D). Interestingly, we found the most abundant isoform of *RUVBL1* was associated with the rs60464856 G allele in the TCGA PCa splicing QTL<sup>44,45</sup> and Mayo cohorts<sup>27,41,42</sup> (Figures S4B–S4D). We also used three gRNAs targeting the rs60464856 locus to transiently transfect the dCas9 stable cells and observed a consistent knockdown effect on *RUVBL1* expressions in all three prostate cell lines (Figure 2E). To evaluate the nuances of endogenous allele transition contributing to downstream gene expression, we applied nickase Cas9 (xCas9) base editing technology, which features high conversion efficiency and a minimal indel rate, to precisely substitute the rs60464856 allele in prostate cells (Figure 2F). Finally, we generated multiple isogenic subclones with accurate

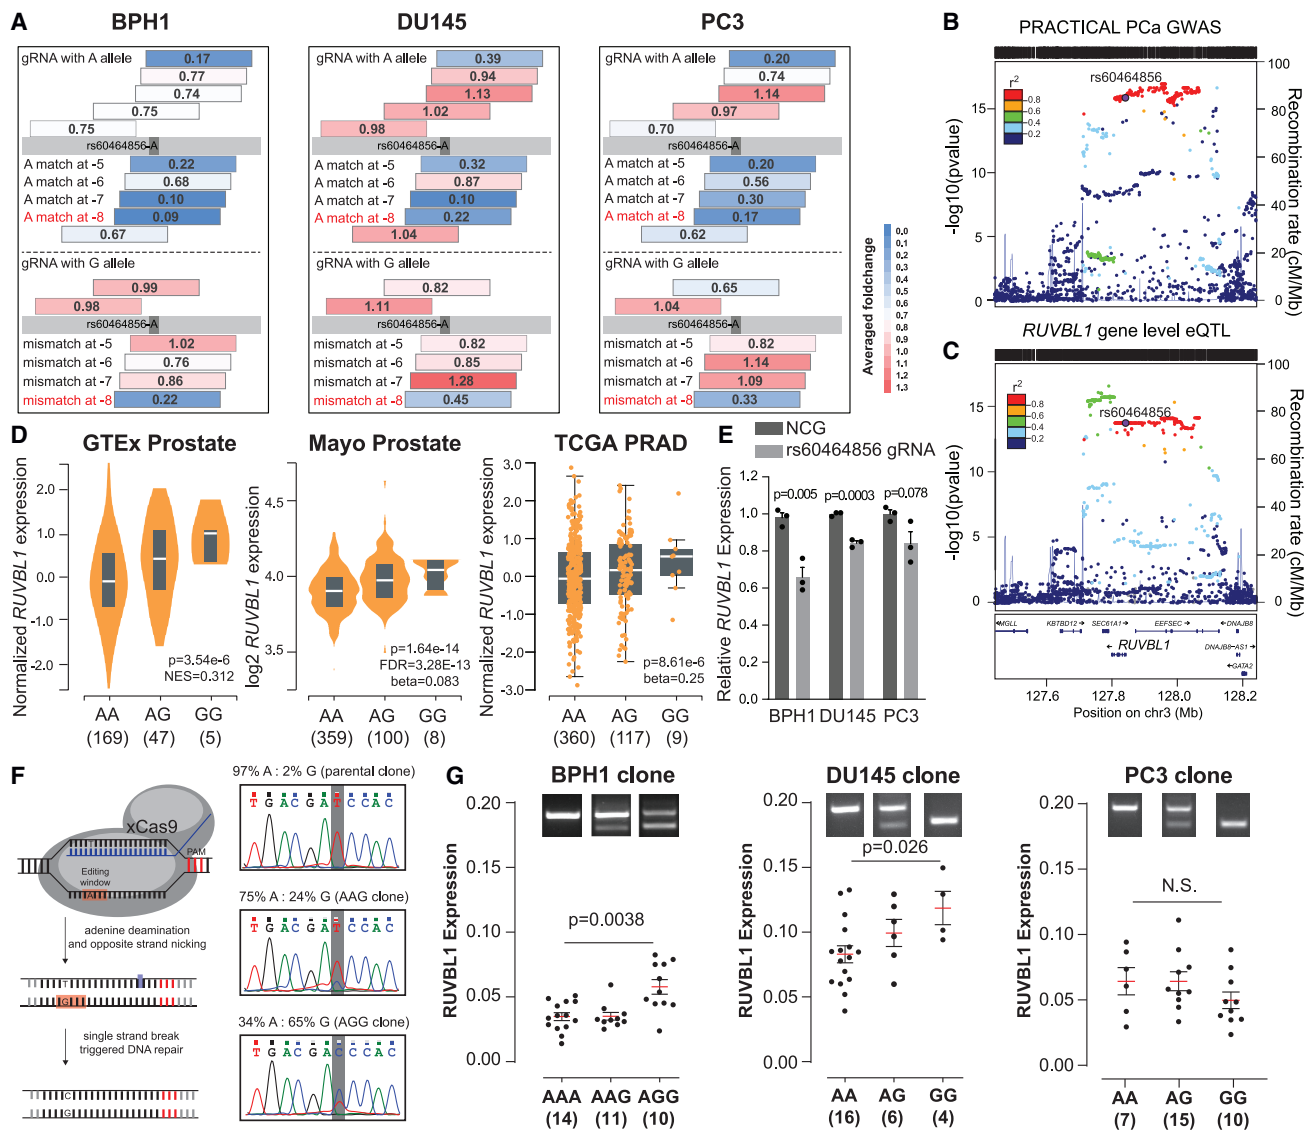

**Figure 2. The rs60464856-*RUVBL1* locus shows a regulatory role underpinning susceptibility to prostate cancer**

(A) Screening fold change of rs60464856 gRNA in BPH1, DU145, and PC3 cells. The Gray indicates the rs60464856 locus in the germline, and colored strips above or below the bar indicate gRNA binding Crick or Watson strands of the germline DNA. Numbers in the center show the average fold change for two screening replicates.

(B) Locus plots for rs60464856 locus PCa GWAS significance in the PRACTICAL cohort.

(C) Locus plots for *RUVBL1* eQTL significance in the Mayo prostate dataset.

(D) eQTL associations between *RUVBL1* expression and rs60464856 genotypes in GTEx, Mayo, and TCGA prostate cohorts.

(E) *RUVBL1* expression in dCas9-KRAB stable prostate cells transfected with non-targeting control guide (NCG) and rs60464856 targeting gRNAs. The individual points indicate different gRNA clones. The inhibition fold changes were calculated from three biological replicates. The bar represents standard error.

(F) Schematic figure showing xCas9-based A-to-G base editing in prostate cell lines.

(G) *RUVBL1* expression in rs60464856 base-edited clones in BPH1, DU145, and PC3 cells. The bar represents the mean and standard error.

base conversion and confirmed significant increases of endogenous *RUVBL1* expression by the G allele in BPH1 and DU145, but not in PC3 cells (Figure 2G).

### rs60464856 binds cohesin subunits allelically in a manner mediated by chromatin interactions

To evaluate potential allelic protein binding at rs60464856, we searched for ChIP-seq data collections, such as Cistrome Data Browser (<http://cistrome.org/db/#/>)<sup>46</sup> and ChIP-Atlas

(<https://chip-atlas.org/>),<sup>16</sup> for potential transcription factor bindings. However, we did not find highly convincing evidence showing allelic TF binding on this locus. Since multiple datasets report histone modification signals on the rs60464856 locus, we then performed ChIP-qPCR to evaluate the locus-specific enrichment for active histone modification markers (H3K4me1, H3K4me3, and H3K27ac) in the base-edited subclones. We found distinct histone modification status in PC3 clones, especially for H3K27ac on the

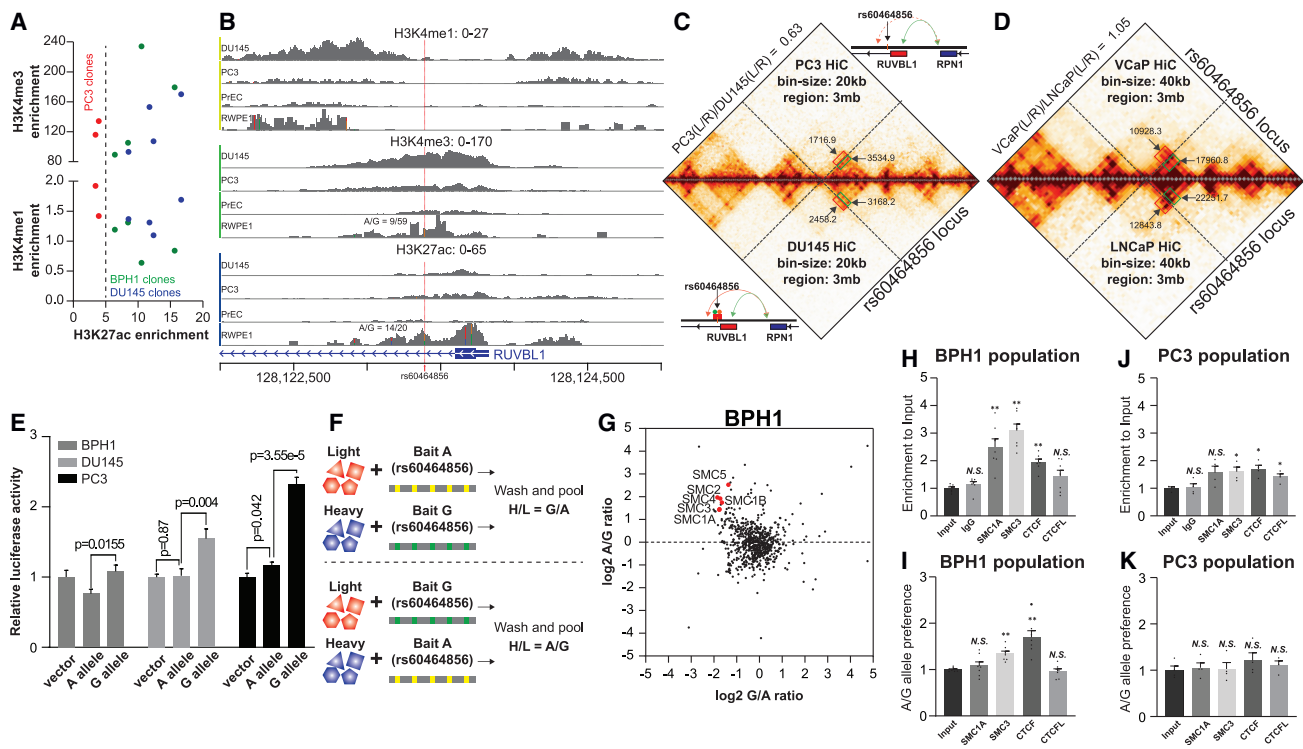

**Figure 3. Involvement of the rs60464856 locus with the *RUVBL1* enhancer, long-range interaction, and allelic binding to cohesin subunits**

(A) H3K4me1, H3K4me3, and H3K27ac modifications on rs60464856 locus in BPH1, DU145, and PC3 clones. (B) ChIP-seq signals of H3K4me1, H3K4me3, and H3K27ac modifications on the rs60464856 locus in prostate cells. (C and D) HiC interaction heatmap in PC3 (C top), DU145 (C bottom), VCaP (D top), and LNCaP (D bottom) cells. Each L and R indicate interaction ICED normalized read count on the left and right sides of the rs60464856 bin. The red and green labeled boxes in the contact matrix represent the interaction hotspot on the left and right side of the rs60464856 locus, respectively. The red and green arrows in the gene-model illustration highlight the interactions between the left and right region, respectively, of rs60464856 and a distant region downstream of *RPN1*. The dotted red arrow demonstrates weakened left interactions in PC3 compared with DU145 cells. (E) Luciferase reporter assay comparing rs60464856 allele transcription activities in BPH1, DU145, and PC3 cells. The bar represents the standard error across multiple technical replicates, and the p values represent simple t test results. (F) SILAC-based DNA pull-down proteomics pipeline for identifying allelic protein binding on the rs60464856 locus. (G) Allelic proteomics with BPH1 SILAC extracts. (H–K) ChIP-qPCR measuring rs60464856 locus enrichment and allele-specific binding to SMC1A, SMC3, CTCF, and CTCFL proteins in BPH1 (H and I) and PC3 (J and K) base-edited populations. Each dot represents experimental data from an independent immunoprecipitation biological replicate. The bar represents the standard error, and the p value significance (\*\*p value <0.001; \*p value <0.05; N.S. = not significant) represents the Mann Whitney test between the ChIPed sample and the input.

rs60464856 locus (Figure 3A). Consistently, we found the enrichment of H3K4me1, H3K4me3, and H3K27ac modifications on rs60464856 in multiple cell lines (Figure 3B), suggesting a robust regulatory potential of this locus in the prostate. Intriguingly, in an rs60464856 heterozygous cell line, RWPE1, we identified higher H3K4me3 and H3K27ac coverage for G than A allele, suggesting stronger transcription activity driven by the risk allele. In prostate cell lines and TCGA prostate cancer tissue<sup>47</sup> (Figure S5), we also identified consistent open chromatin signals near the rs60464856 locus, further supporting its regulatory potential on *RUVBL1*. With a recent HiC dataset,<sup>31</sup> we also visualized the long-range interactions surrounding the rs60464856 locus. By summing the normalized count from the interaction hot spot on both sides of the rs60464856 locus, we calculated the left-to-right ratio (L/R) in each cell line (Figures S6A–S6E). This analysis showed that PC3 cells had only 60% interaction compared

to DU145 cells (Figure 3C). In contrast, the interactions L/R ratios were roughly equal in VCaP and LNCaP cells (Figure 3D). To confirm the transcription activity of the rs60464856 locus, we tested its flanking sequence (chr3: 128,123,257–128,123,479, negative strand) using a reporter assay and found higher promoter activity of the G allele than the A allele in these cell lines (Figure 3E).

We then applied SILAC-based proteomics to detect possible transcription factors or DNA-binding proteins. This assay took advantage of isotype-labeled nuclear extract in DNA pull-down reactions, thus converting the protein binding difference into the ratio of different molecular weights (Figure 3F). This proteomics analysis identified increased cohesin subunits bound to the rs60464856 A rather than the G allele within the BPH1 nuclear extract (Figure 3G). To further elucidate whether cohesin could bind endogenous rs60464856 locus allelically, we used ChIP assays specific to the rs60464856 locus from



BPH1 and PC3 base-edited populations. In BPH1 cells, we found significant locus enrichment (Figure 3H) for SMC1A, SMC3, and CTCF, and the A allele preference for SMC3 and CTCF (Figure 3I). In PC3 cells, we only found minor locus enrichment for SMC3 and CTCF (Figure 3J), and no allele preference was observed for all tested antibodies (Figure 3K). We also explored the unique allelic binding role of SMC3, using existing ChIP-seq datasets<sup>48</sup> (GSE49402 and GSE36578) that quantified SMC1A and SMC3 binding in the human genome (Figure S7A). We performed STREME motif scan with the private peak region of SMC1A and SMC3, and found that only SMC3 private peaks included an outstanding significant motif in both cell lines (Figure S7B). Through STREME -TOMTOM comparison, we also found that this motif was highly similar to the CTCF binding site (MA0139.1) (Figure S7C). More importantly, the rs60464856 A allele is located in the CTCF zinc finger seven interaction domain and is consistently preferred by multiple versions of the CTCF motif.<sup>49</sup> This result suggests a potential mechanism about how the rs60464856 protective allele mediates cohesin-CTCF complex formation and supports our observation in the HiC datasets (Figures 3C and 3D).

#### ***RUVBL1* knockdown inhibits prostate-cell proliferation by downregulating cell-cycle-related pathways**

To evaluate the oncogenic role of *RUVBL1*, we examined the perturbation effect of *RUVBL1* by CRISPR or RNAi screening in the DepMap portal (<https://depmap.org/portal/>). We found that *RUVBL1* was a common essential gene in most human cell lines and had a stronger dependency score than the median of all essential genes for the prostate cell lines used in our screening, including BPH1, DU145, and PC3 cells (Figure 4A). To further characterize the function of *RUVBL1*, we generated stable cell lines infected with small hairpin RNA (shRNA) lentiviral particles and verified that *RUVBL1* had been successfully knocked down at the mRNA and protein expression (Figures S8 and 4B). We further monitored the growth of the stable cell lines with daily Incucyte scans and found that *RUVBL1* knockdown by both shRNAs significantly suppressed proliferation in BPH1 (Figure 4C), DU145 (Figure 4D), and PC3 (Figure 4E) cell lines. We also observed drastic reductions in colony formation for the *RUVBL1* knockdown group in BPH1, DU145, and PC3 cells (Figure 4F). To characterize the transcriptome alteration caused by *RUVBL1* downregulation, we quantified RNA profiling of BPH1 and PC3 cells and calculated the GSEA score for the HALLMARK gene set collection. Interestingly, multiple cell-cycle-related pathways, including MYC targets, E2F targets, and G2M checkpoint genes, showed significant enrichment with *RUVBL1* expression (Figures 4G–4H). We further visualized the changes in gene expression in these significantly enriched pathways and found consistent trends with *RUVBL1* expression (Figure 4I). To further explore the *RUVBL1*-related transcriptomic alterations induced by the rs60464856 risk allele, we performed

mRNA-seq in ten BPH-1 clones, including five with AAA and five with AGG genotypes. The RNA-seq result shows 1.35-fold higher *RUVBL1* expression in AGG clones than in AAA clones; PPDE (posterior probabilities of being differentially expressed) is equal to 0.99999995 (Figure S9A). We also performed GSEA analysis with the normalized RNA-seq data in the HALLMARK gene set collection and found pathway changes similar to those in *RUVBL1* knockdown experiments and TCGA prostate-cancer profiling (Figure S9B). To characterize the tumorigenic effect of *RUVBL1* *in vivo*, we performed xenograft mouse experiments with the PC3 stable cell lines. We found that the *RUVBL1* knockdown significantly inhibited tumor growth (Figure 4J) and reduced endpoint tumor weight in the mice model (Figure 4K).

#### ***RUVBL1* expression increases aggressiveness and predicts a worse prognosis in prostate cancer**

To characterize the malignant potential associated with *RUVBL1* in clinical samples, we retrieved three indices of genome instabilities, including the altered fraction of the genome, mutation count, and aneuploidy score for 488 TCGA prostate cancer. We found that *RUVBL1* expression was positively associated with these indices (Figures 5A–5C). Additionally, prostate cancer with higher *RUVBL1* expression tended to have a more advanced T stage and Gleason score (Figure 5D). We also calculated the GSEA score for the HALLMARK gene set collection with the TCGA prostate-cancer RNA profiling and found that the cell-cycle-related pathways showed up consistently in the eight most significantly enriched gene sets (Figure 5E). We further demonstrated the enrichment score (Figures 5F–5G) and FDR q value for these significantly enriched pathways and found consistent positive enrichment with *RUVBL1* expression. We performed a Kaplan-Meier analysis to see whether *RUVBL1* could serve as a prognostic marker and found significantly worse progression-free (Figure 5H) survival in individuals with higher *RUVBL1* expression. To determine whether the *RUVBL1*-enriched genes could serve a prognostic role, we also used k-means clustering methods with the leading-edge gene to separate the prostate-cancer patients into groups with different risks (Figure 5I). The Kaplan-Meier analysis showed that individuals with increased risk tended to have significantly worse progression-free survival (Figures 5J–5L). Additionally, *RUVBL1* expression was consistently upregulated in PCa primary and metastasis tumor tissue (Figures S10A–S10C).<sup>50–52</sup> We also demonstrated a positive association between *RUVBL1* expression and elevated pre-diagnostic PSA level,<sup>52</sup> higher Gleason score,<sup>53</sup> and worse biochemical recurrence-free survival<sup>54</sup> in existing cohorts (Figures S10D–S10F).

#### **Discussion**

Over the past decade, GWASs and eQTL analyses have been highly productive in finding PCa risk loci and susceptibility

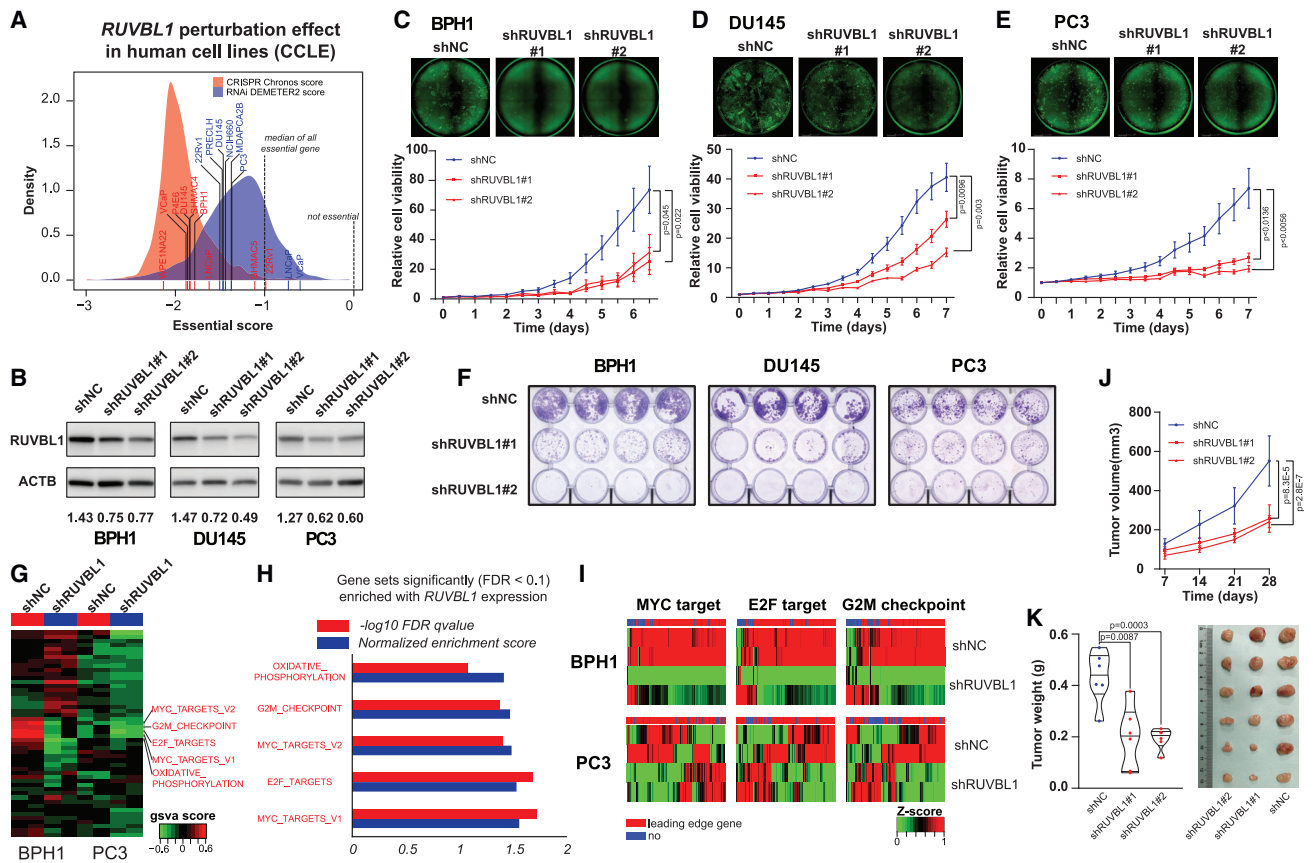

**Figure 4. Cell-cycle arrest mediated by *RUVBL1* knockdown significantly inhibits prostate cell proliferation**

(A) Dependency score of *RUVBL1* for CRISPR and RNAi screening from CCLE human cell line collections. A score of 0 indicates that a gene is not essential, whereas a score of  $-1$  is comparable to the median of all pan-essential genes.

(B) Measuring *RUVBL1* protein expression after shRNA knockdown with lentiviral infection (low MOI). The numbers below each lane indicate *RUVBL1* protein intensity normalized to that of the ACTB internal control.

(C–E) Cell proliferation curve comparing cell-growth differences after *RUVBL1* knockdown in BPH1 (C), DU145 (D), and PC3 (E) cell lines. Each bar represents experimental data from six independent technical replicates. The experiment has been repeated twice starting from lentiviral infection.

(F) Colony-formation assay comparing clonogenic potential alterations after *RUVBL1* knockdown in BPH1, DU145, and PC3 cell lines. Each well represents experimental data from four technical replicates. The experiment has been repeated twice starting from lentiviral infection.

(G) GSEA on RNA-seq data in BPH1 and PC3 cells after *RUVBL1* knockdown on HALLMARK collection pathways.

(H) GSEA summary for the most significant *RUVBL1*-driven gene sets in BPH1 and PC3 cells.

(I) Representative heatmap showing significantly enriched HALLMARK pathways, including MYC target, E2F target, and G2M checkpoint. The RNA-seq was performed in two technical replicates within each group.

(J and K) Tumor volume changes (J) and tumor weight (K) comparison in xenograft experiments with the PC3 cell line. Each xenograft subgroup included six biological replicates.

genes.<sup>55–57</sup> Despite contributing to a better understanding of the biological significance of risk predisposition, these analyses did not directly demonstrate the regulatory role of individual loci and the functional consequence of each causal gene. To better delineate the functionality of these genetic findings, a large-scale functional evaluation of target risk loci is highly warranted. Because of the non-coding nature of most risk loci, these variants are believed to play a regulatory role. Therefore, we applied the dCas9-based CRISPRi assay to target SNP sequences at risk loci and aimed to mimic the regulatory alteration caused by single base substitutions. This genome-wide screening at PCa risk loci revealed 117 SNPs showing a regulatory role in cell proliferation. Interestingly, these prolif-

eration-related SNPs are enriched in gene transcription start sites, suggesting that the majority of the phenotypic changes are related to transcription alterations caused by dCas9 interference.

This study characterized the regulatory role of a risk SNP, rs60464856. We observed consistent growth inhibition by multiple gRNAs targeting this locus. More importantly, with multiple gRNA targeting both alleles at the same genomic locations, we observed interesting phenotypic changes related to seed region mismatches in multiple prostate cell lines. As demonstrated by previous studies,<sup>58,59</sup> any mismatches in the 7-bp seed region of the gRNA could cause a rapid rejection of these targets by the dCas9 protein. These facts might explain the

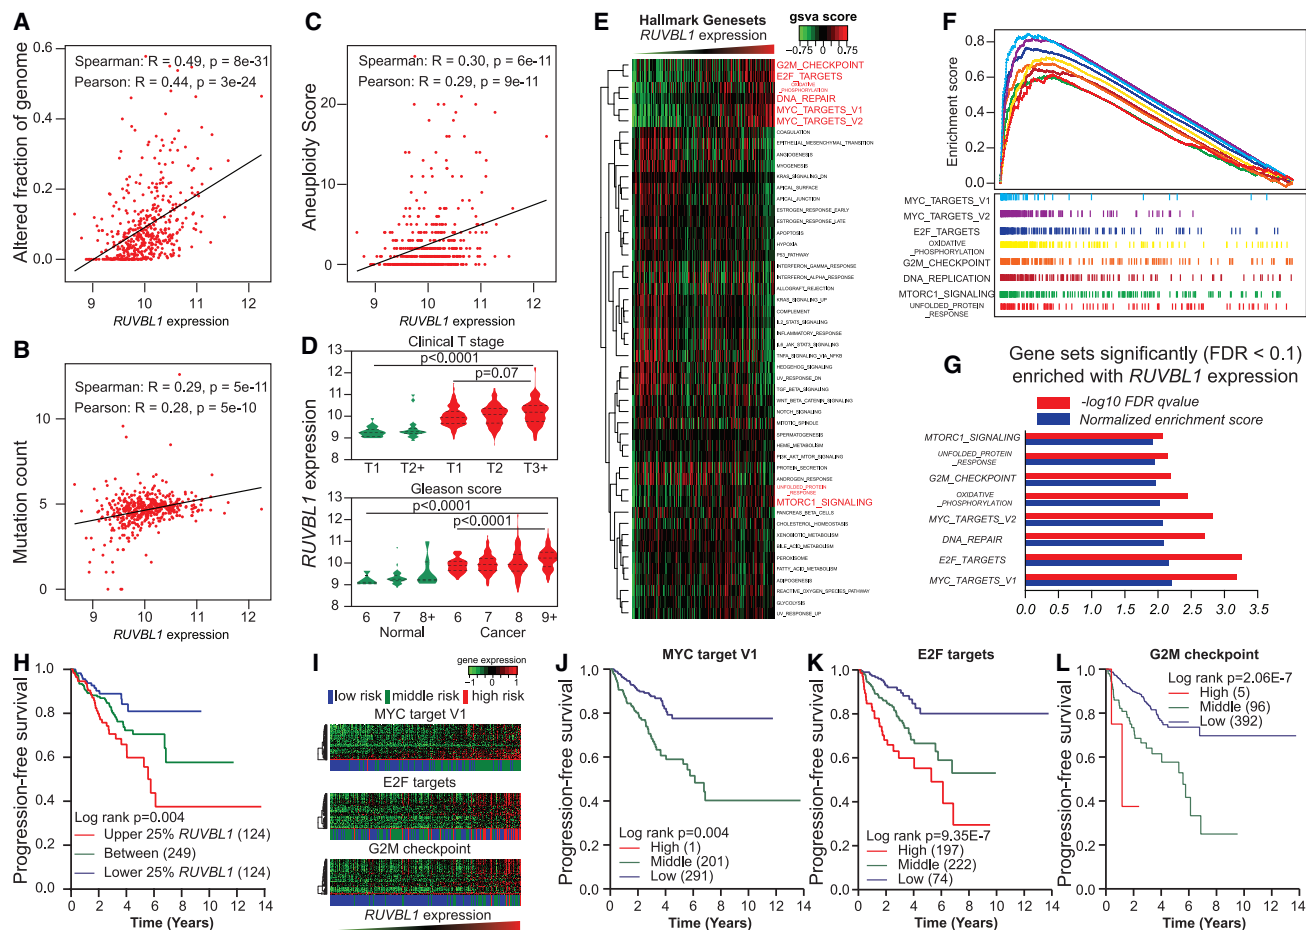

**Figure 5. Association between *RUVBL1* expression and aggressiveness in prostate cancer**

(A–C) Associations in TCGA prostate cancer cohort between *RUVBL1* expression and genome instability metrics, including the altered fraction of genome (A), the mutation count (B), and the aneuploidy score (C). (D) *RUVBL1* expression in TCGA prostate tissue with different T stages and Gleason scores. The p value tested the linear trends between the *RUVBL1* expression with the incremental stages or scores. The dashed lines indicate the quartiles and the medians of each group. (E) GSEA on RNA-seq data in TCGA prostate cancer tissue by ranking *RUVBL1* expression on HALLMARK collection pathways. (F) GSEA enrichment plots showing significantly enriched HALLMARK pathways in TCGA prostate cohort. (G) Normalized enrichment score and FDR q value for significantly enriched HALLMARK pathways in the TCGA prostate cohort. (H) Kaplan-Meier analysis of progression-free survival in TCGA prostate cancer patients stratified by *RUVBL1* gene expression. (I) Heatmap with *RUVBL1* leading-edge genes; the side bar shows k-means-stratified groups with different risks related to significantly enriched HALLMARK pathways, including MYC target V1, E2F targets, and G2M checkpoint, in the TCGA prostate cohort. (J–L) Kaplan-Meier analysis on progression-free survival in TCGA prostate cancer patients stratified by the GSEA leading-edge gene enriched with *RUVBL1* in each pathway, including MYC targets V1 (J), E2F targets (K), and G2M checkpoints (L).

A-allele-specific depletion effect of gRNA on positions  $-5$  to  $-7$ , as shown in our data (see Figure 2A). When the mismatch is located outside the seed region, the gRNA with SNP at the  $-8$  position showed depletion effects for both alleles. To further validate the regulatory role of rs60464856, we created multiple subclones carrying converted G alleles. As expected, the G-allele-carrying subclones showed elevated *RUVBL1* expression in BPH1 and DU145 cells. However, this elevated expression was not observed in PC3 subclones, possibly as a result of the distinct status of histone modification and chromatin interaction in PC3 cells.

This study also showed allele-specific binding of SMC3, which is different from SMC1A, at the rs60464856 locus. As the major subunits of human cohesin, both SMC1A

and SMC3 mediate multiple biological processes, including DNA looping, chromosome condensation, and chromosome segregation, by forming heterodimers.<sup>60,61</sup> Intriguingly, there have been several unique observations about the distinct phenotypic changes brought about by *SMC1A* or *SMC3* knockdown. Magdalena et al.<sup>62</sup> identified that *SMC3* knockdown rendered *SMC1A* unstable and led to less cytoplasmic accumulation, whereas *SMC1A* knockdown did not influence *SMC3* stability or cytoplasmic accumulation. A recent study<sup>63</sup> reported that *SMC1A* and *SMC3* ATPase active sites had differential effects on cohesin ATPase function and that *SMC3* has a unique function in DNA tethering. Our database mining showed significant signal overlap between *SMC1A* and *SMC3* binding sites in the genome, but only private peaks from *SMC3* enriched

CTCF motifs in the two cell lines studied. As an insulator that can block enhancers to regulate target genes, CTCF was first discovered as a transcriptional repressor and believed to execute a hub role in controlling gene expression.<sup>49,64</sup> In our findings, CTCF might also play a crucial role in governing *RUVBL1* gene regulation, potentially through insulating the rs60464856 loci allelically.

*RUVBL1*, also known as RuvB-like AAA ATPase 1 or TIP49, possesses an ATP-dependent DNA helicase activity and has been reported to regulate a wide range of cellular processes,<sup>65</sup> including chromatin decondensation,<sup>66,67</sup> misfolded protein aggregation,<sup>68</sup> and transcription regulation.<sup>69</sup> In addition to the previously reported mTORC1 pathway,<sup>70</sup> our enrichment analysis demonstrated that *RUVBL1* expression was consistently correlated with cell-cycle regulation and MYC signaling activities in both cell lines and tumor tissues. This result demonstrates a potential use of *RUVBL1*-selective inhibitors in treating prostate cancer.<sup>71,72</sup> The result also suggests using the rs60464856 genotype to stratify a target population for future clinical trials.

One potential limitation of this study is inconsistent results in some tests among different cell lines. Although these inconsistencies might attribute to genetic heterogeneity, we also want to highlight that some hits found exclusively in DU145 cells are reported to be functional in prostate cells—for instance, the established functional variants residing in the binding sites of the transcription factors TMPRSS2-ERG and HNF1B.<sup>73</sup> Additionally, to increase our gRNA library coverage, we can use novel CRISPR systems with expanded PAM site compatibility. With stringent library preparation and screening processes, the biological implications for the functional variants discovered exclusively in only a singular cell line are still worth investigating, which might uncover unique SNP and gene functions specific to the subline of interest. In summary, we applied CRISPRi screening technology to screen for survival-essential SNPs at the genome scale. We identified more than a hundred functional SNPs that regulate cell proliferation. We further characterized the rs60464856 risk variant for its regulatory role in the prostate context and target gene *RUVBL1* for its functional role in prostate-cancer cell proliferation and disease progression. This result will enrich our knowledge of PCa predisposition and provide insight into the cancer risk classification and potential therapeutic targets for personalized treatment.

## Data and code availability

The accession number for the results reported in this paper is GEO: GSE224654, which includes CRISPRi screening gRNA readout (GEO: GSE224653) and RNA-seq expression for the *RUVBL1* knockdown experiment (GEO: GSE224646). The gRNA sequence design, raw and normalized count, and the eQTL mapped with the candidate SNP are listed in Table S2. The RIGER analysis output is listed in Table S3. The publicly available datasets used are listed in Table S4. The SILAC proteomics sequencing result is listed in

Table S5. Detailed information about the rs60464856 base editing can be accessed in the github repository ([https://github.com/Yijun-Tian/Base\\_Editing-rs60464856](https://github.com/Yijun-Tian/Base_Editing-rs60464856)).

## Supplemental information

Supplemental information can be found online at <https://doi.org/10.1016/j.ajhg.2023.07.003>.

## Acknowledgments

We thank Flow Cytometry; Molecular Genomic; Proteomics and Metabolomics; and Analytic Microscopy core facilities at the Moffitt Cancer Center, an NCI-designated Comprehensive Cancer Center (P30CA076292). The authors also acknowledge the participants and investigators of the FinnGen study ([www.finnngen.fi](http://www.finnngen.fi)). This work was supported by the National Institutes of Health (R01CA250018 and R01CA212097 to L. Wang, R01CA263494 to L. Wu) and National Natural Science Foundation of China (82073082) as well as the Jane and Aatos Erkkö Foundation, the Finnish Cancer Foundation, and the Sigrid Juséliuksen Säätiö to G.-H.W. This study was also supported by the Medical Science Data Center of Fudan University. We thank Dr. Stephen N. Thibodeau at Mayo Clinic for providing the eQTL candidate list for designing this screening. We also thank the PRACTICAL consortium for providing GWAS resources supporting this project. The full funding information and the author affiliation for the consortium are listed in the supplemental information.

## Author contributions

Y.T. and L.W. contributed to study design and performed CRISPRi and proteomics screening, statistical analysis and functional validation. D.D., Z.W. and G.-H.W. performed functional analysis and mouse work. L.Wu. and J.P. contributed to collecting GWAS summary statistics, G.-H.W. and L.W. supervised the study and contributed to study design and data interpretation. Y.T., D.D., G.-H.W., and L.W. co-wrote the manuscript. All authors read, commented on, and approved the final version.

## Declaration of interests

The authors declare no competing interests.

Received: March 7, 2023

Accepted: July 6, 2023

Published: August 3, 2023

## Web resources

ChIP-Atlas, <https://chip-atlas.org/>

count\_spacer.py, [https://github.com/fengzhanglab/Screening\\_Protocols\\_manuscript](https://github.com/fengzhanglab/Screening_Protocols_manuscript)

Cutadapt, <https://cutadapt.readthedocs.io/en/stable/>

cworld-dekker, <https://github.com/dekkerlab/cworld-dekker>

Depmap, <https://depmap.org/portal/>

FinnGen PheWAS, <https://r8.finnngen.fi/>

GEO, <https://www.ncbi.nlm.nih.gov/geo/>

GSEA, <https://www.gsea-msigdb.org/gsea/index.jsp>

GTEX, <https://gtexportal.org/home/>

NCI GDC Data Portal, <https://portal.gdc.cancer.gov/>

RSEM, <https://github.com/deweylab/RSEM>  
 Sequence Read Archive (SRA), <https://www.ncbi.nlm.nih.gov/sra/>  
 TCGA chromatin accessibility landscape, <https://gdc.cancer.gov/about-data/publications/ATACseq-AWG>  
 TCGA Pan-Cancer Splicing Quantitative Trait Loci, <http://www.cancersplicingqtl-hust.com/#/>  
 TCGA PancanQTL, <http://bioinfo.life.hust.edu.cn/PancanQTL/>  
 TCGA SpliceSeq, [https://bioinformatics.mdanderson.org/TCGA\\_SpliceSeq/](https://bioinformatics.mdanderson.org/TCGA_SpliceSeq/)  
 Uniprot, <https://www.uniprot.org/>

## References

- Siegel, R.L., Miller, K.D., Fuchs, H.E., and Jemal, A. (2021). Cancer Statistics, 2021. *CA. Cancer J. Clin.* *71*, 7–33. <https://doi.org/10.3322/caac.21654>.
- Schaid, D.J., Sinnwell, J.P., Batzler, A., and McDonnell, S.K. (2022). Polygenic risk for prostate cancer: Decreasing relative risk with age but little impact on absolute risk. *Am. J. Hum. Genet.* *109*, 900–908. <https://doi.org/10.1016/j.ajhg.2022.03.008>.
- Buniello, A., MacArthur, J.A.L., Cerezo, M., Harris, L.W., Hayhurst, J., Malangone, C., McMahon, A., Morales, J., Mountjoy, E., Sollis, E., et al. (2019). The NHGRI-EBI GWAS Catalog of published genome-wide association studies, targeted arrays and summary statistics 2019. *Nucleic Acids Res.* *47*, D1005–D1012. <https://doi.org/10.1093/nar/gky1120>.
- Stadler, Z.K., Thom, P., Robson, M.E., Weitzel, J.N., Kauff, N.D., Hurley, K.E., Devlin, V., Gold, B., Klein, R.J., and Offitt, K. (2010). Genome-wide association studies of cancer. *J. Clin. Oncol.* *28*, 4255–4267. <https://doi.org/10.1200/JCO.2009.25.7816>.
- Farashi, S., Kryza, T., Clements, J., and Batra, J. (2019). Post-GWAS in prostate cancer: from genetic association to biological contribution. *Nat. Rev. Cancer* *19*, 46–59. <https://doi.org/10.1038/s41568-018-0087-3>.
- Gallagher, M.D., and Chen-Plotkin, A.S. (2018). The Post-GWAS Era: From Association to Function. *Am. J. Hum. Genet.* *102*, 717–730. <https://doi.org/10.1016/j.ajhg.2018.04.002>.
- Edwards, S.L., Beesley, J., French, J.D., and Dunning, A.M. (2013). Beyond GWAS: illuminating the dark road from association to function. *Am. J. Hum. Genet.* *93*, 779–797. <https://doi.org/10.1016/j.ajhg.2013.10.012>.
- Tian, P., Zhong, M., and Wei, G.H. (2021). Mechanistic insights into genetic susceptibility to prostate cancer. *Cancer Lett.* *522*, 155–163. <https://doi.org/10.1016/j.canlet.2021.09.025>.
- Ernst, J., Kheradpour, P., Mikkelsen, T.S., Shores, N., Ward, L.D., Epstein, C.B., Zhang, X., Wang, L., Issner, R., Coyne, M., et al. (2011). Mapping and analysis of chromatin state dynamics in nine human cell types. *Nature* *473*, 43–49. <https://doi.org/10.1038/nature09906>.
- Maurano, M.T., Humbert, R., Rynes, E., Thurman, R.E., Haugen, E., Wang, H., Reynolds, A.P., Sandstrom, R., Qu, H., Brody, J., et al. (2012). Systematic localization of common disease-associated variation in regulatory DNA. *Science* *337*, 1190–1195. <https://doi.org/10.1126/science.1222794>.
- Trynka, G., Sandor, C., Han, B., Xu, H., Stranger, B.E., Liu, X.S., and Raychaudhuri, S. (2013). Chromatin marks identify critical cell types for fine mapping complex trait variants. *Nat. Genet.* *45*, 124–130. <https://doi.org/10.1038/ng.2504>.
- Shetty, A., Seo, J.H., Bell, C.A., O'Connor, E.P., Pomerantz, M.M., Freedman, M.L., and Gusev, A. (2021). Allele-specific epigenetic activity in prostate cancer and normal prostate tissue implicates prostate cancer risk mechanisms. *Am. J. Hum. Genet.* *108*, 2071–2085. <https://doi.org/10.1016/j.ajhg.2021.09.008>.
- Zhu, Q., Ge, D., Heinzen, E.L., Dickson, S.P., Urban, T.J., Zhu, M., Maia, J.M., He, M., Zhao, Q., Shianna, K.V., and Goldstein, D.B. (2012). Prioritizing genetic variants for causality on the basis of preferential linkage disequilibrium. *Am. J. Hum. Genet.* *91*, 422–434. <https://doi.org/10.1016/j.ajhg.2012.07.010>.
- Fritsche, L.G., Patil, S., Beesley, L.J., VandeHaar, P., Salvatore, M., Ma, Y., Peng, R.B., Taliun, D., Zhou, X., and Mukherjee, B. (2020). Cancer PRSweb: An Online Repository with Polygenic Risk Scores for Major Cancer Traits and Their Evaluation in Two Independent Biobanks. *Am. J. Hum. Genet.* *107*, 815–836. <https://doi.org/10.1016/j.ajhg.2020.08.025>.
- Kichaev, G., Bhatia, G., Loh, P.R., Gazal, S., Burch, K., Freund, M.K., Schoech, A., Pasaniuc, B., and Price, A.L. (2019). Leveraging Polygenic Functional Enrichment to Improve GWAS Power. *Am. J. Hum. Genet.* *104*, 65–75. <https://doi.org/10.1016/j.ajhg.2018.11.008>.
- Oki, S., Ohta, T., Shioi, G., Hatanaka, H., Ogasawara, O., Okuda, Y., Kawaji, H., Nakaki, R., Sese, J., and Meno, C. (2018). ChIP-Atlas: a data-mining suite powered by full integration of public ChIP-seq data. *EMBO Rep.* *19*, e46255. <https://doi.org/10.15252/embr.201846255>.
- Davis, C.A., Hitz, B.C., Sloan, C.A., Chan, E.T., Davidson, J.M., Gabdank, I., Hilton, J.A., Jain, K., Baymuradov, U.K., Narayanan, A.K., et al. (2018). The Encyclopedia of DNA elements (ENCODE): data portal update. *Nucleic Acids Res.* *46*, D794–D801. <https://doi.org/10.1093/nar/gkx1081>.
- Fornes, O., Castro-Mondragon, J.A., Khan, A., van der Lee, R., Zhang, X., Richmond, P.A., Modi, B.P., Correard, S., Gheorghe, M., Baranašić, D., et al. (2020). JASPAR 2020: update of the open-access database of transcription factor binding profiles. *Nucleic Acids Res.* *48*, D87–D92. <https://doi.org/10.1093/nar/gkz1001>.
- GTEX Consortium (2013). The Genotype-Tissue Expression (GTEx) project. *Nat. Genet.* *45*, 580–585. <https://doi.org/10.1038/ng.2653>.
- Gurumurthy, C.B., Grati, M., Ohtsuka, M., Schilit, S.L.P., Quadros, R.M., and Liu, X.Z. (2016). CRISPR: a versatile tool for both forward and reverse genetics research. *Hum. Genet.* *135*, 971–976. <https://doi.org/10.1007/s00439-016-1704-4>.
- Yang, L., Chan, A.K.N., Miyashita, K., Delaney, C.D., Wang, X., Li, H., Pokharel, S.P., Li, S., Li, M., Xu, X., et al. (2021). High-resolution characterization of gene function using single-cell CRISPR tiling screen. *Nat. Commun.* *12*, 4063. <https://doi.org/10.1038/s41467-021-24324-0>.
- Yan, F., Li, J., Milosevic, J., Petroni, R., Liu, S., Shi, Z., Yuan, S., Reynaga, J.M., Qi, Y., Rico, J., et al. (2022). KAT6A and ENL Form an Epigenetic Transcriptional Control Module to Drive Critical Leukemogenic Gene-Expression Programs. *Cancer Discov.* *12*, 792–811. <https://doi.org/10.1158/2159-8290.CD-20-1459>.
- Gasparini, M., Findlay, G.M., McKenna, A., Milbank, J.H., Lee, C., Zhang, M.D., Cusanovich, D.A., and Shendure, J. (2017). CRISPR/Cas9-Mediated Scanning for Regulatory Elements Required for HPRT1 Expression via Thousands

- of Large, Programmed Genomic Deletions. *Am. J. Hum. Genet.* *101*, 192–205. <https://doi.org/10.1016/j.ajhg.2017.06.010>.
24. Wojtal, D., Kemaladewi, D.U., Malam, Z., Abdullah, S., Wong, T.W.Y., Hyatt, E., Baghestani, Z., Pereira, S., Stavropoulos, J., Mouly, V., et al. (2016). Spell Checking Nature: Versatility of CRISPR/Cas9 for Developing Treatments for Inherited Disorders. *Am. J. Hum. Genet.* *98*, 90–101. <https://doi.org/10.1016/j.ajhg.2015.11.012>.
  25. Gilbert, L.A., Horlbeck, M.A., Adamson, B., Villalta, J.E., Chen, Y., Whitehead, E.H., Guimaraes, C., Panning, B., Ploegh, H.L., Bassik, M.C., et al. (2014). Genome-Scale CRISPR-Mediated Control of Gene Repression and Activation. *Cell* *159*, 647–661. <https://doi.org/10.1016/j.cell.2014.09.029>.
  26. Gilbert, L.A., Larson, M.H., Morsut, L., Liu, Z., Brar, G.A., Torres, S.E., Stern-Ginossar, N., Brandman, O., Whitehead, E.H., Doudna, J.A., et al. (2013). CRISPR-mediated modular RNA-guided regulation of transcription in eukaryotes. *Cell* *154*, 442–451. <https://doi.org/10.1016/j.cell.2013.06.044>.
  27. Thibodeau, S.N., French, A.J., McDonnell, S.K., Chevillat, J., Middha, S., Tillmans, L., Riska, S., Baheti, S., Larson, M.C., Fogarty, Z., et al. (2015). Identification of candidate genes for prostate cancer-risk SNPs utilizing a normal prostate tissue eQTL data set. *Nat. Commun.* *6*, 8653. <https://doi.org/10.1038/ncomms9653>.
  28. Luo, B., Cheung, H.W., Subramanian, A., Sharifnia, T., Okamoto, M., Yang, X., Hinkle, G., Boehm, J.S., Beroukhi, R., Weir, B.A., et al. (2008). Highly parallel identification of essential genes in cancer cells. *Proc. Natl. Acad. Sci. USA* *105*, 20380–20385. <https://doi.org/10.1073/pnas.0810485105>.
  29. Hu, J.H., Miller, S.M., Geurts, M.H., Tang, W., Chen, L., Sun, N., Zeina, C.M., Gao, X., Rees, H.A., Lin, Z., and Liu, D.R. (2018). Evolved Cas9 variants with broad PAM compatibility and high DNA specificity. *Nature* *556*, 57–63. <https://doi.org/10.1038/nature26155>.
  30. Tian, Y., Liu, Q., Yu, S., Chu, Q., Chen, Y., Wu, K., and Wang, L. (2020). NRF2-Driven KEAP1 Transcription in Human Lung Cancer. *Mol. Cancer Res.* *18*, 1465–1476. <https://doi.org/10.1158/1541-7786.MCR-20-0108>.
  31. San Martin, R., Das, P., Dos Reis Marques, R., Xu, Y., Roberts, J.M., Sanders, J.T., Gollosi, R., and McCord, R.P. (2022). Chromosome compartmentalization alterations in prostate cancer cell lines model disease progression. *J. Cell Biol.* *221*, e202104108. <https://doi.org/10.1083/jcb.202104108>.
  32. Butter, F., Davison, L., Vitorawong, T., Scheibe, M., Vermeulen, M., Todd, J.A., and Mann, M. (2012). Proteome-wide analysis of disease-associated SNPs that show allele-specific transcription factor binding. *PLoS Genet.* *8*, e1002982. <https://doi.org/10.1371/journal.pgen.1002982>.
  33. Coudert, E., Gehant, S., de Castro, E., Pozzato, M., Baratin, D., Neto, T., Sigrist, C.J.A., Redaschi, N., Bridge, A.; and UniProt Consortium (2023). Annotation of biologically relevant ligands in UniProtKB using ChEBI. *Bioinformatics* *39*, btac793. <https://doi.org/10.1093/bioinformatics/btac793>.
  34. Lafontaine, D.L., Yang, L., Dekker, J., and Gibcus, J.H. (2021). Hi-C 3.0: Improved Protocol for Genome-Wide Chromosome Conformation Capture. *Curr. Protoc.* *1*, e198. <https://doi.org/10.1002/cpz1.198>.
  35. Li, B., and Dewey, C.N. (2011). RSEM: accurate transcript quantification from RNA-Seq data with or without a reference genome. *BMC Bioinf.* *12*, 323. <https://doi.org/10.1186/1471-2105-12-323>.
  36. Subramanian, A., Tamayo, P., Mootha, V.K., Mukherjee, S., Ebert, B.L., Gillette, M.A., Paulovich, A., Pomeroy, S.L., Golub, T.R., Lander, E.S., and Mesirov, J.P. (2005). Gene set enrichment analysis: a knowledge-based approach for interpreting genome-wide expression profiles. *Proc. Natl. Acad. Sci. USA* *102*, 15545–15550. <https://doi.org/10.1073/pnas.0506580102>.
  37. Akgol Oksuz, B., Yang, L., Abraham, S., Venev, S.V., Krientein, N., Parsi, K.M., Ozadam, H., Oomen, M.E., Nand, A., Mao, H., et al. (2021). Systematic evaluation of chromosome conformation capture assays. *Nat. Methods* *18*, 1046–1055. <https://doi.org/10.1038/s41592-021-01248-7>.
  38. Boytsov, A., Abramov, S., Aiusheeva, A.Z., Kasianova, A.M., Baulin, E., Kuznetsov, I.A., Aulchenko, Y.S., Kolmykov, S., Yevshin, I., Kolpakov, F., et al. (2022). ANANASTRA: annotation and enrichment analysis of allele-specific transcription factor binding at SNPs. *Nucleic Acids Res.* *50*, W51–W56. <https://doi.org/10.1093/nar/gkac262>.
  39. Schumacher, F.R., Al Olama, A.A., Berndt, S.I., Benlloch, S., Ahmed, M., Saunders, E.J., Dadaev, T., Leongamornlert, D., Anokian, E., Cieza-Borrella, C., et al. (2018). Association analyses of more than 140,000 men identify 63 new prostate cancer susceptibility loci. *Nat. Genet.* *50*, 928–936. <https://doi.org/10.1038/s41588-018-0142-8>.
  40. Kurki, M.I., Karjalainen, J., Palta, P., Sipilä, T.P., Kristiansson, K., Donner, K.M., Reeve, M.P., Laivuori, H., Aavikko, M., Kainisto, M.A., et al. (2023). FinnGen provides genetic insights from a well-phenotyped isolated population. *Nature* *613*, 508–518. <https://doi.org/10.1038/s41586-022-05473-8>.
  41. Tian, Y., Soupir, A., Liu, Q., Wu, L., Huang, C.C., Park, J.Y., and Wang, L. (2022). Novel role of prostate cancer risk variant rs7247241 on PPP1R14A isoform transition through allelic TF binding and CpG methylation. *Hum. Mol. Genet.* *31*, 1610–1621. <https://doi.org/10.1093/hmg/ddab347>.
  42. Larson, N.B., McDonnell, S., French, A.J., Fogarty, Z., Chevillat, J., Middha, S., Riska, S., Baheti, S., Nair, A.A., Wang, L., et al. (2015). Comprehensively evaluating cis-regulatory variation in the human prostate transcriptome by using gene-level allele-specific expression. *Am. J. Hum. Genet.* *96*, 869–882. <https://doi.org/10.1016/j.ajhg.2015.04.015>.
  43. Gong, J., Mei, S., Liu, C., Xiang, Y., Ye, Y., Zhang, Z., Feng, J., Liu, R., Diao, L., Guo, A.Y., et al. (2018). PancanQTL: systematic identification of cis-eQTLs and trans-eQTLs in 33 cancer types. *Nucleic Acids Res.* *46*, D971–D976. <https://doi.org/10.1093/nar/gkx861>.
  44. Tian, J., Wang, Z., Mei, S., Yang, N., Yang, Y., Ke, J., Zhu, Y., Gong, Y., Zou, D., Peng, X., et al. (2019). CancerSplicingQTL: a database for genome-wide identification of splicing QTLs in human cancer. *Nucleic Acids Res.* *47*, D909–D916. <https://doi.org/10.1093/nar/gky954>.
  45. Ryan, M., Wong, W.C., Brown, R., Akbani, R., Su, X., Broom, B., Melott, J., and Weinstein, J. (2016). TCGASpliceSeq a compendium of alternative mRNA splicing in cancer. *Nucleic Acids Res.* *44*, D1018–D1022. <https://doi.org/10.1093/nar/gkv1288>.
  46. Zheng, R., Wan, C., Mei, S., Qin, Q., Wu, Q., Sun, H., Chen, C.H., Brown, M., Zhang, X., Meyer, C.A., and Liu, X.S. (2019). Cistrome Data Browser: expanded datasets and new tools for gene regulatory analysis. *Nucleic Acids Res.* *47*, D729–D735. <https://doi.org/10.1093/nar/gky1094>.
  47. Corces, M.R., Granja, J.M., Shams, S., Louie, B.H., Seoane, J.A., Zhou, W., Silva, T.C., Groeneveld, C., Wong, C.K., Cho, S.W.,

- et al. (2018). The chromatin accessibility landscape of primary human cancers. *Science* 362, eaav1898. <https://doi.org/10.1126/science.aav1898>.
48. Yan, J., Enge, M., Whittington, T., Dave, K., Liu, J., Sur, I., Schmierer, B., Jolma, A., Kivioja, T., Taipale, M., and Taipale, J. (2013). Transcription factor binding in human cells occurs in dense clusters formed around cohesin anchor sites. *Cell* 154, 801–813. <https://doi.org/10.1016/j.cell.2013.07.034>.
  49. Yin, M., Wang, J., Wang, M., Li, X., Zhang, M., Wu, Q., and Wang, Y. (2017). Molecular mechanism of directional CTCF recognition of a diverse range of genomic sites. *Cell Res.* 27, 1365–1377. <https://doi.org/10.1038/cr.2017.131>.
  50. Yu, Y.P., Landsittel, D., Jing, L., Nelson, J., Ren, B., Liu, L., McDonald, C., Thomas, R., Dhir, R., Finkelstein, S., et al. (2004). Gene expression alterations in prostate cancer predicting tumor aggression and preceding development of malignancy. *J. Clin. Oncol.* 22, 2790–2799. <https://doi.org/10.1200/JCO.2004.05.158>.
  51. Varambally, S., Yu, J., Laxman, B., Rhodes, D.R., Mehra, R., Tomlins, S.A., Shah, R.B., Chandran, U., Monzon, F.A., Becich, M.J., et al. (2005). Integrative genomic and proteomic analysis of prostate cancer reveals signatures of metastatic progression. *Cancer Cell* 8, 393–406. <https://doi.org/10.1016/j.ccr.2005.10.001>.
  52. Taylor, B.S., Schultz, N., Hieronymus, H., Gopalan, A., Xiao, Y., Carver, B.S., Arora, V.K., Kaushik, P., Cerami, E., Reva, B., et al. (2010). Integrative genomic profiling of human prostate cancer. *Cancer Cell* 18, 11–22. <https://doi.org/10.1016/j.ccr.2010.05.026>.
  53. Setlur, S.R., Mertz, K.D., Hoshida, Y., Demichelis, F., Lupien, M., Perner, S., Sboner, A., Pawitan, Y., Andr n, O., Johnson, L.A., et al. (2008). Estrogen-dependent signaling in a molecularly distinct subclass of aggressive prostate cancer. *J. Natl. Cancer Inst.* 100, 815–825. <https://doi.org/10.1093/jnci/djn150>.
  54. Ross-Adams, H., Lamb, A.D., Dunning, M.J., Halim, S., Lindberg, J., Massie, C.M., Egevad, L.A., Russell, R., Ramos-Montoya, A., Vowler, S.L., et al. (2015). Integration of copy number and transcriptomics provides risk stratification in prostate cancer: A discovery and validation cohort study. *EBioMedicine* 2, 1133–1144. <https://doi.org/10.1016/j.ebiom.2015.07.017>.
  55. Eeles, R.A., Durocher, F., Edwards, S., Teare, D., Badzioch, M., Hamoudi, R., Gill, S., Biggs, P., Dearnaley, D., Arden-Jones, A., et al. (1998). Linkage analysis of chromosome 1q markers in 136 prostate cancer families. The Cancer Research Campaign/British Prostate Group U.K. Familial Prostate Cancer Study Collaborators. *Am. J. Hum. Genet.* 62, 653–658. <https://doi.org/10.1086/301745>.
  56. Xu, J. (2000). Combined analysis of hereditary prostate cancer linkage to 1q24-25: results from 772 hereditary prostate cancer families from the International Consortium for Prostate Cancer Genetics. *Am. J. Hum. Genet.* 66, 945–957. <https://doi.org/10.1086/302807>.
  57. Schaid, D.J., McDonnell, S.K., Blute, M.L., and Thibodeau, S.N. (1998). Evidence for autosomal dominant inheritance of prostate cancer. *Am. J. Hum. Genet.* 62, 1425–1438. <https://doi.org/10.1086/301862>.
  58. Boyle, E.A., Andreasson, J.O.L., Chircus, L.M., Sternberg, S.H., Wu, M.J., Guegler, C.K., Doudna, J.A., and Greenleaf, W.J. (2017). High-throughput biochemical profiling reveals sequence determinants of dCas9 off-target binding and unbinding. *Proc. Natl. Acad. Sci. USA* 114, 5461–5466. <https://doi.org/10.1073/pnas.1700557114>.
  59. Zheng, T., Hou, Y., Zhang, P., Zhang, Z., Xu, Y., Zhang, L., Niu, L., Yang, Y., Liang, D., Yi, F., et al. (2017). Profiling single-guide RNA specificity reveals a mismatch sensitive core sequence. *Sci. Rep.* 7, 40638. <https://doi.org/10.1038/srep40638>.
  60. Sun, M., Nishino, T., and Marko, J.F. (2013). The SMC1-SMC3 cohesin heterodimer structures DNA through supercoiling-dependent loop formation. *Nucleic Acids Res.* 41, 6149–6160. <https://doi.org/10.1093/nar/gkt303>.
  61. Deardorff, M.A., Kaur, M., Yaeger, D., Rampuria, A., Korolev, S., Pie, J., Gil-Rodr guez, C., Arnedo, M., Loeys, B., Kline, A.D., et al. (2007). Mutations in cohesin complex members SMC3 and SMC1A cause a mild variant of cornelia de Lange syndrome with predominant mental retardation. *Am. J. Hum. Genet.* 80, 485–494. <https://doi.org/10.1086/511888>.
  62. Lausch, M., Seebach, J., Schnittler, H., and Jessberger, R. (2013). Imbalance of SMC1 and SMC3 cohesins causes specific and distinct effects. *PLoS One* 8, e65149. <https://doi.org/10.1371/journal.pone.0065149>.
  63.  amdere, G., Guacci, V., Stricklin, J., and Koshland, D. (2015). The ATPases of cohesin interface with regulators to modulate cohesin-mediated DNA tethering. *Elife* 4, e11315. <https://doi.org/10.7554/eLife.11315>.
  64. Filippova, G.N., Fagerlie, S., Klenova, E.M., Myers, C., Dehner, Y., Goodwin, G., Neiman, P.E., Collins, S.J., and Lobanenkov, V.V. (1996). An exceptionally conserved transcriptional repressor, CTCF, employs different combinations of zinc fingers to bind diverged promoter sequences of avian and mammalian c-myc oncogenes. *Mol. Cell Biol.* 16, 2802–2813. <https://doi.org/10.1128/MCB.16.6.2802>.
  65. Dauden, M.I., L pez-Perrote, A., and Llorca, O. (2021). RUVBL1-RUVBL2 AAA-ATPase: a versatile scaffold for multiple complexes and functions. *Curr. Opin. Struct. Biol.* 67, 78–85. <https://doi.org/10.1016/j.sbi.2020.08.010>.
  66. Gentili, C., Castor, D., Kaden, S., Lauterbach, D., Gysi, M., Steigemann, P., Gerlich, D.W., Jiricny, J., and Ferrari, S. (2015). Chromosome Missegregation Associated with RUVBL1 Deficiency. *PLoS One* 10, e0133576. <https://doi.org/10.1371/journal.pone.0133576>.
  67. Magalska, A., Schellhaus, A.K., Moreno-Andr s, D., Zanini, F., Schooley, A., Sachdev, R., Schwarz, H., Madlung, J., and Antonin, W. (2014). RuvB-like ATPases function in chromatin decondensation at the end of mitosis. *Dev. Cell* 31, 305–318. <https://doi.org/10.1016/j.devcel.2014.09.001>.
  68. Zaarur, N., Xu, X., Lestienne, P., Meriin, A.B., McComb, M., Costello, C.E., Newnam, G.P., Ganti, R., Romanova, N.V., Shanmugasundaram, M., et al. (2015). RuvBL1 and RuvBL2 enhance aggresome formation and disaggregate amyloid fibrils. *EMBO J.* 34, 2363–2382. <https://doi.org/10.15252/embj.201591245>.
  69. Wang, H., Li, B., Zuo, L., Wang, B., Yan, Y., Tian, K., Zhou, R., Wang, C., Chen, X., Jiang, Y., et al. (2022). The transcriptional coactivator RUVBL2 regulates Pol II clustering with diverse transcription factors. *Nat. Commun.* 13, 5703. <https://doi.org/10.1038/s41467-022-33433-3>.
  70. Shin, S.H., Lee, J.S., Zhang, J.M., Choi, S., Boskovic, Z.V., Zhao, R., Song, M., Wang, R., Tian, J., Lee, M.H., et al. (2020). Synthetic lethality by targeting the RUVBL1/2-TTT complex in mTORC1-hyperactive cancer cells. *Sci. Adv.* 6, eaay9131. <https://doi.org/10.1126/sciadv.aay9131>.

71. Assimon, V.A., Tang, Y., Vargas, J.D., Lee, G.J., Wu, Z.Y., Lou, K., Yao, B., Menon, M.K., Pios, A., Perez, K.C., et al. (2019). CB-6644 Is a Selective Inhibitor of the RUVBL1/2 Complex with Anticancer Activity. *ACS Chem. Biol.* *14*, 236–244. <https://doi.org/10.1021/acscchembio.8b00904>.
72. Zhang, G., Wang, F., Li, S., Cheng, K.W., Zhu, Y., Huo, R., Abdukirim, E., Kang, G., and Chou, T.F. (2022). Discovery of small-molecule inhibitors of RUVBL1/2 ATPase. *Bioorg. Med. Chem.* *62*, 116726. <https://doi.org/10.1016/j.bmc.2022.116726>.
73. Giannareas, N., Zhang, Q., Yang, X., Na, R., Tian, Y., Yang, Y., Ruan, X., Huang, D., Yang, X., Wang, C., et al. (2022). Extensive germline-somatic interplay contributes to prostate cancer progression through HNF1B co-option of TMPRSS2-ERG. *Nat. Commun.* *13*, 7320. <https://doi.org/10.1038/s41467-022-34994-z>.



The American Journal of Human Genetics, Volume 110

**Supplemental information**

**Combined CRISPRi and proteomics screening reveal  
a cohesin-CTCF-bound allele contributing  
to increased expression of *RUVBL1* and prostate cancer progression**

**Yijun Tian, Dandan Dong, Zixian Wang, Lang Wu, Jong Y. Park, the PRACTICAL consortium, Gong-Hong Wei, and Liang Wang**

# Supplementary Figures

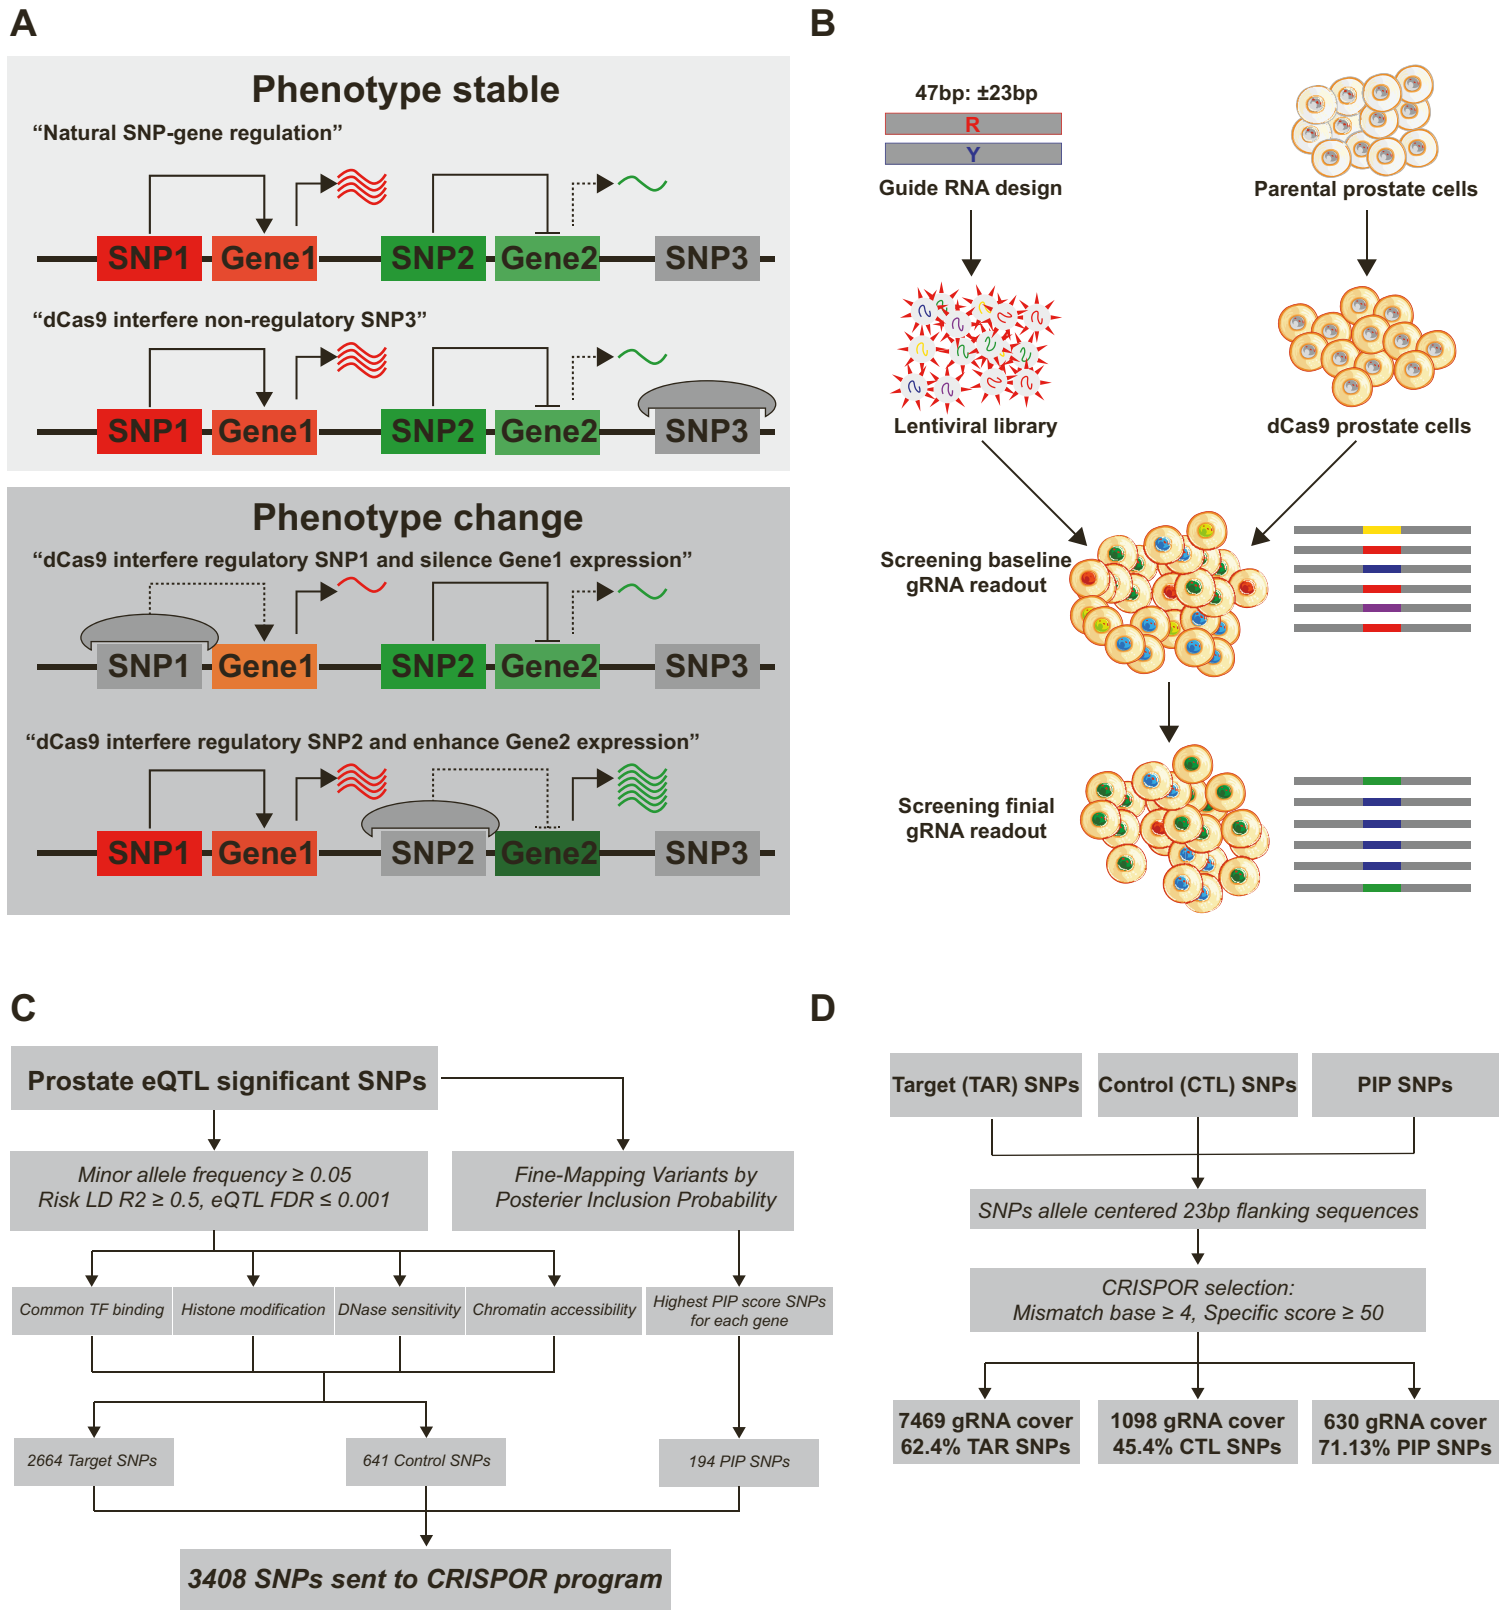

**Figure S1. Overall CRISPRi screening projection and design.** **A.** Rationale for phenotype oriented CRISPRi-SNPs-seq screening. **B.** CRISPRi screening procedures in dCas9 stable prostate cell lines. **C.** Candidate eQTL risk SNPs selection before gRNA design. **D.** gRNA searching details within candidate SNPs by CRISPOR program.

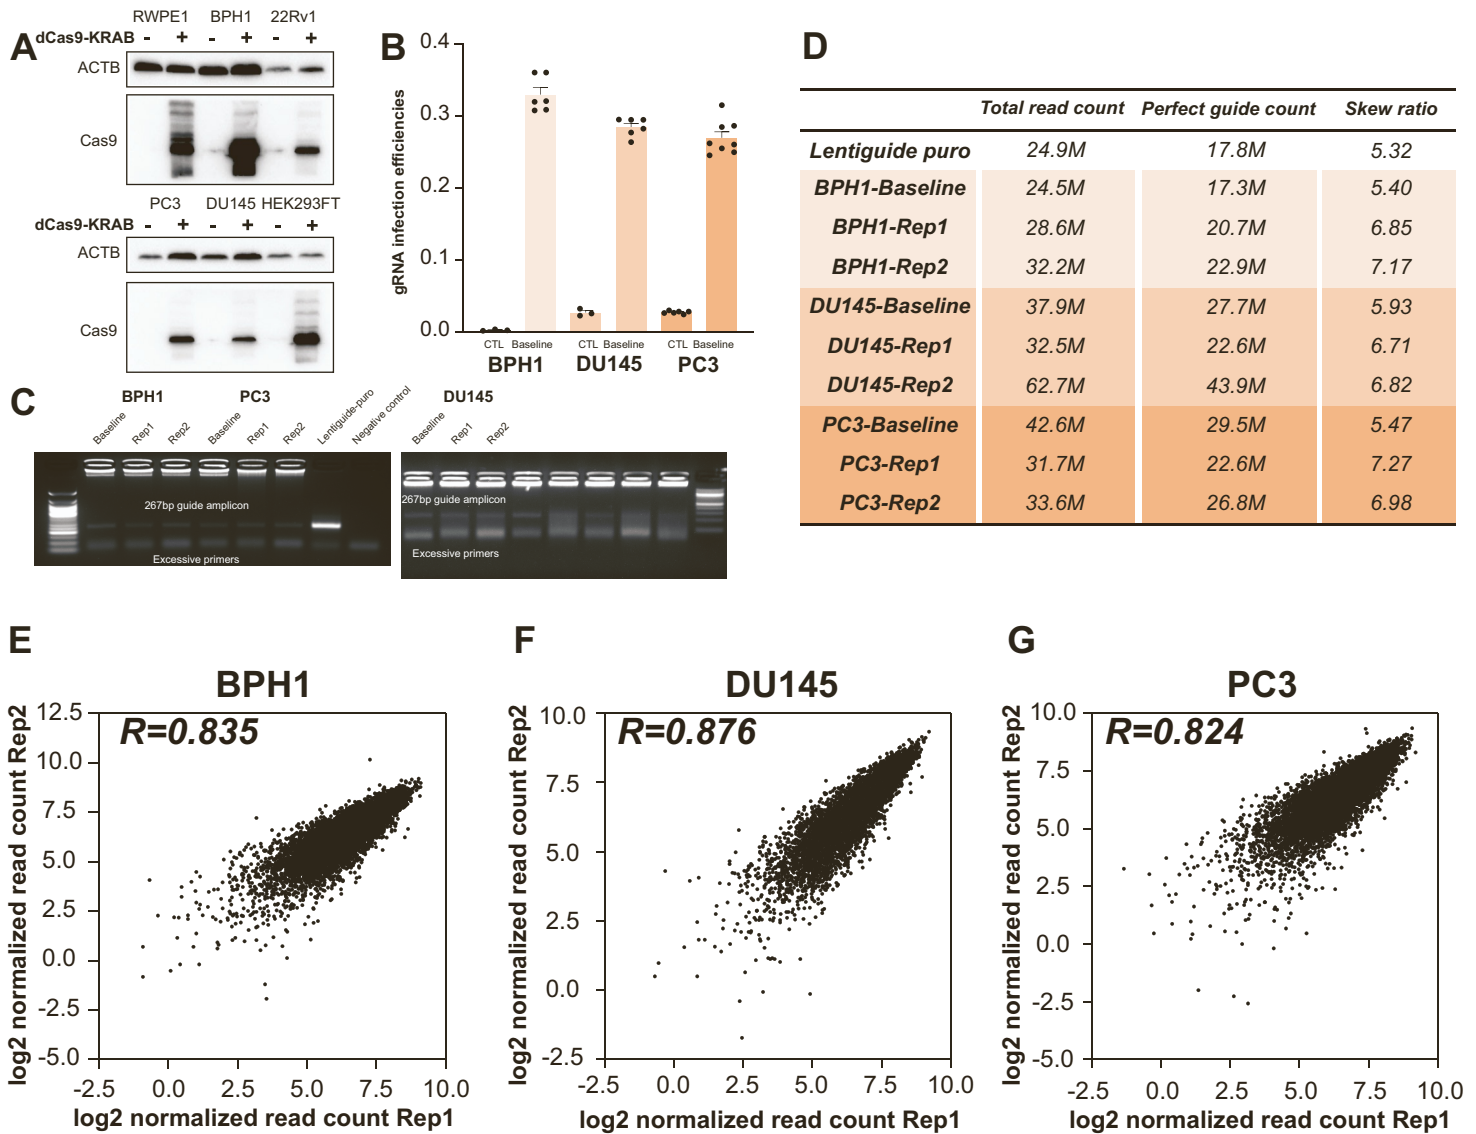

**Figure S2. CRISPRi screening quality control.** **A.** Western blots of Cas9 protein in dCas9 stable cell lines. **B.** Functional titration of lentiGuide-Puro virus to ensure low MOI integration. Each dot represents a titration technical replicate and the error bar represent the standard error across all measurement. **C.** Gel image of gRNA readout amplicon from each screening after PCR. The template gDNA amount for each sample is equivalent to extraction from at least 5 million cells. **D.** gRNA read count summary after count\_spacers.py quantification. **E-G.** Reproducibility of technical replicates in BPH1 (**E**), DU145 (**F**), and PC3 (**G**) cells.

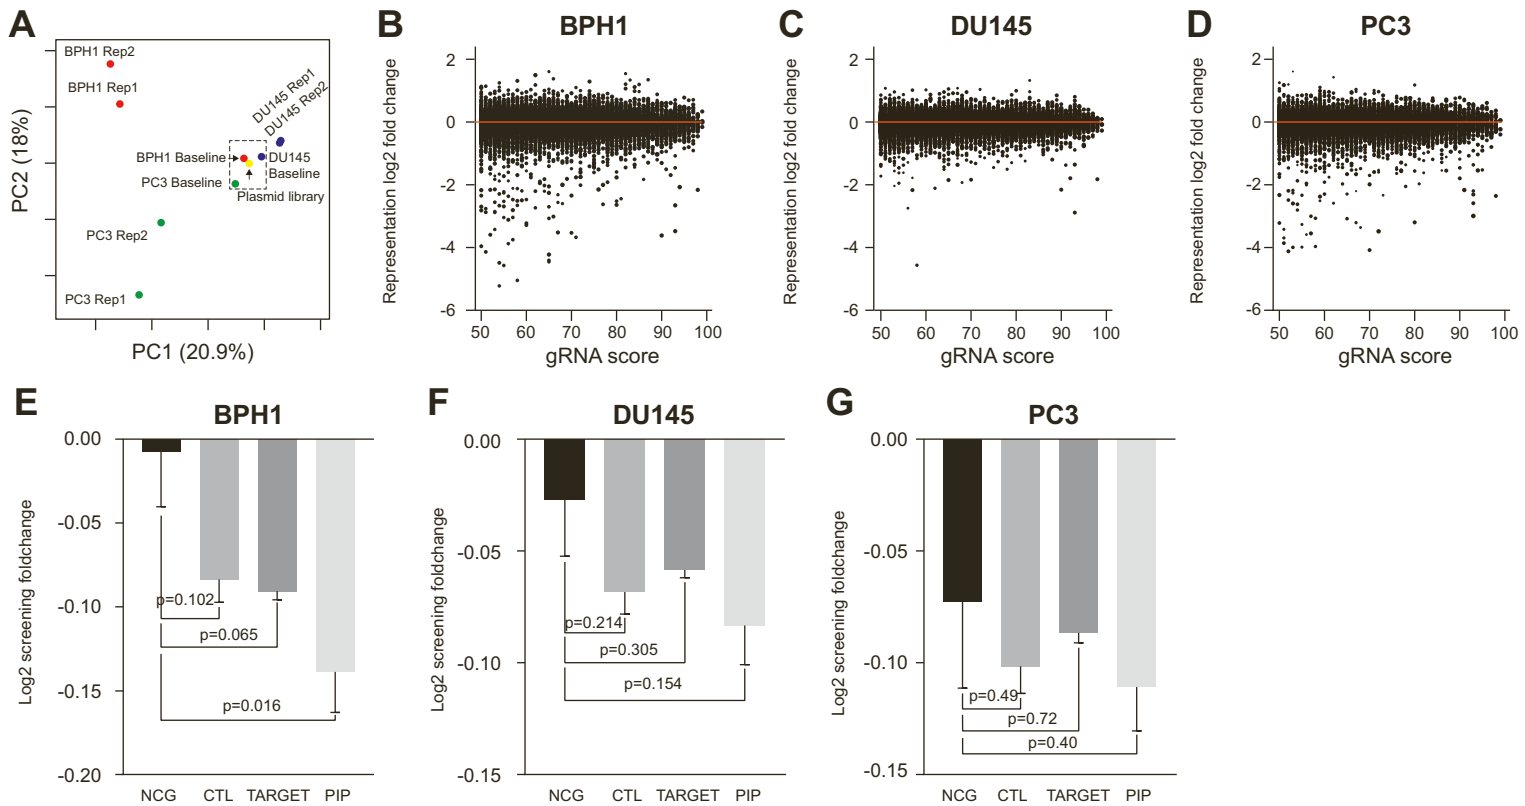

**Figure S3. Screening hit characterization.** **A.** PCA analysis of raw gRNA count in lentiGuide-Puro plasmid and each screening sample. **B-D.** Correlation between average gRNA foldchange and specificity score in BPH1 (**B**), DU145 (**C**), and PC3 (**D**) cells. **E-G.** gRNA foldchange comparison between predefined categories in BPH1 (**E**), DU145 (**F**), and PC3 (**G**) cells. The gRNA foldchange was calculated by averaging between the 2 biological replicates. The error bar represented the standard error of gRNA foldchange within each category.

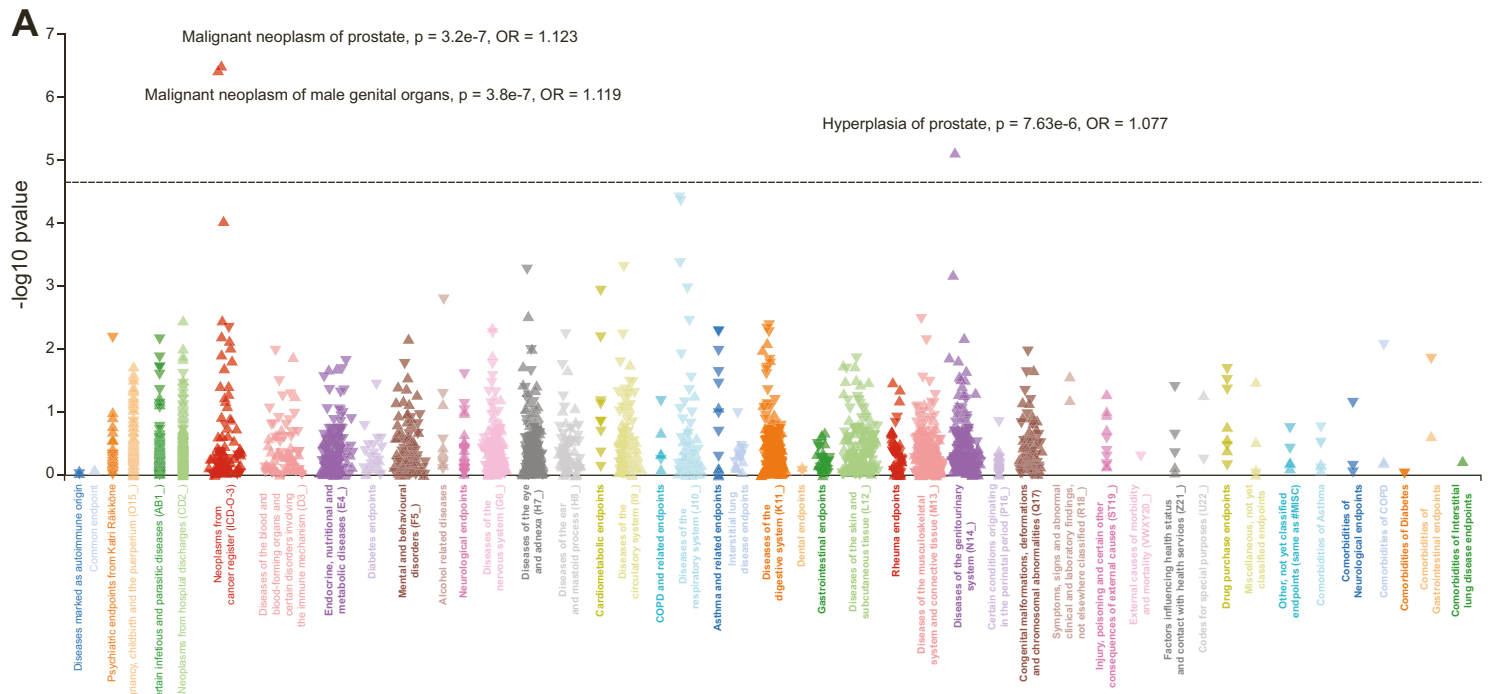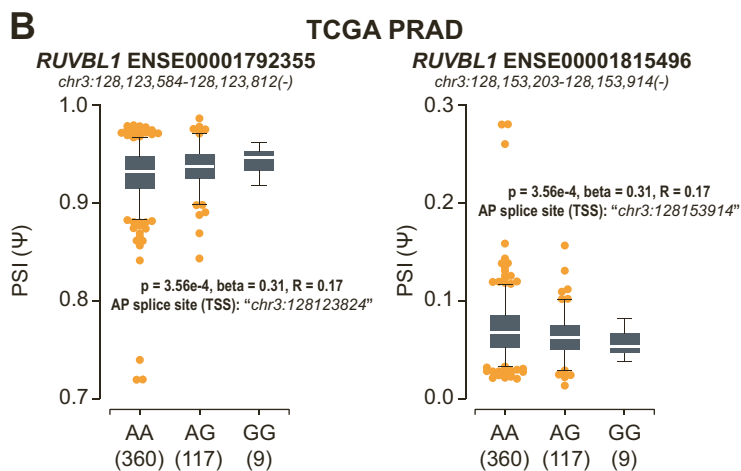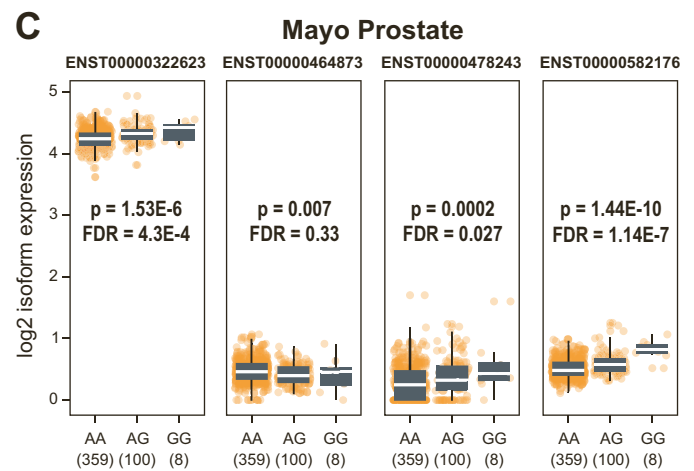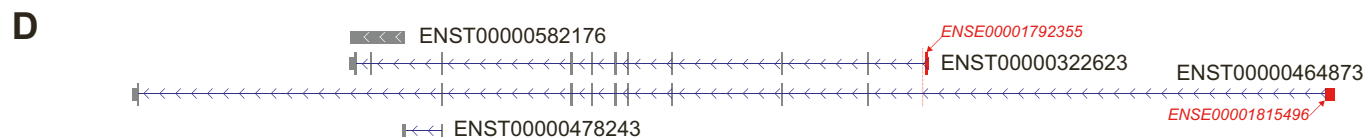

**Figure S4. Prostate cancer risk and *RUVBL1* splicing associations with rs60464856 in existing GWAS and RNA-seq cohorts. A.** PheWAS results between rs60464856 and 2,202 endpoints in the FinnGen study ( $n = 342,499$ ). **B.** Associations between *RUVBL1* alternative promoter (AP) percent Spliced In (PSI,  $\Psi$ ) values and rs60464856 genotype. The ENSEMBL id indicated the first exon used by the corresponding AP event. The  $\Psi$  values were obtained from TCGA SpliceSeq databases. The p-values were retrieved from the TCGA Pan-Cancer Splicing QTL databases. **C.** Associations between *RUVBL1* isoform expression and rs60464856 genotype in Mayo prostate cohort. The p-value and FDR were calculated by MatrixEQTL package. **D.** Demonstration of *RUVBL1* gene structure in relation to the exons and isoforms discussed in the above plots.

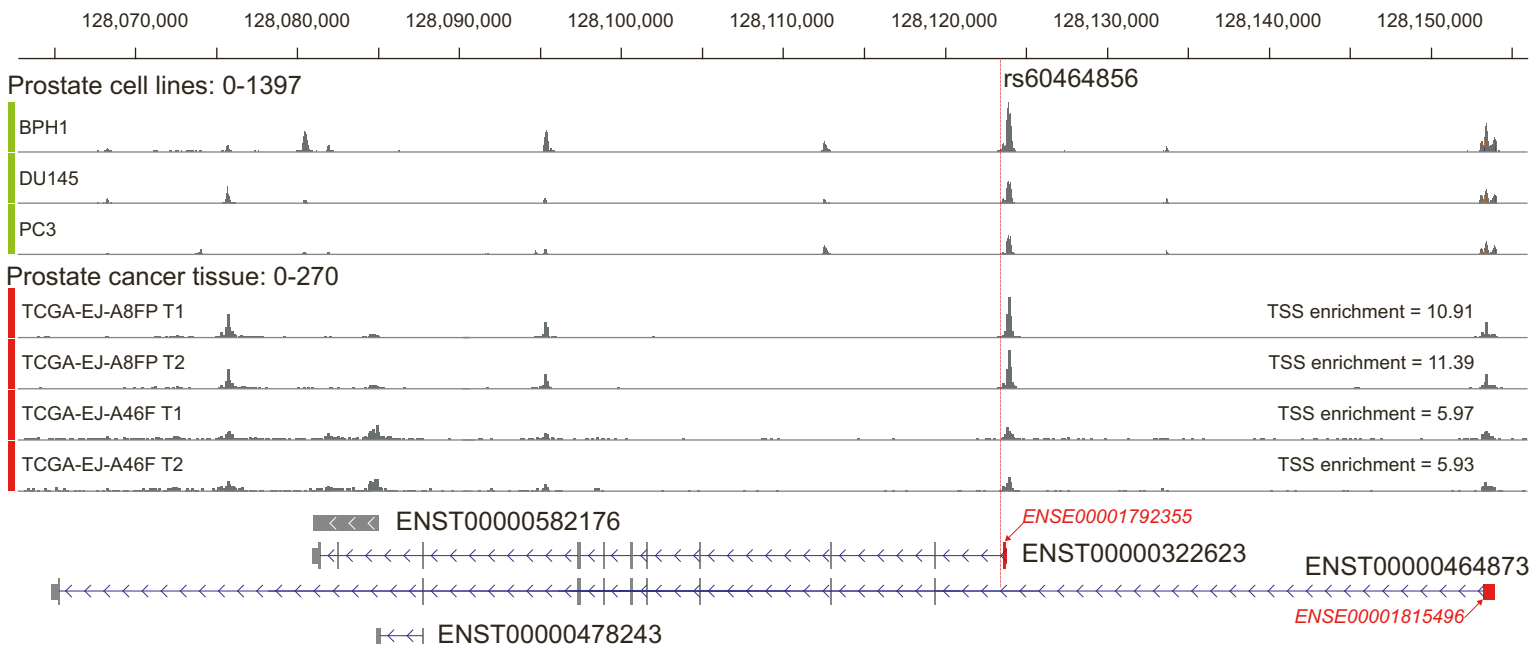

**Figure S5. Chromatin accessibility surrounding rs60464856 locus in prostate cell lines and prostate cancer tissue.** The ATAC-seq data for prostate cell lines and TCGA prostate cancer cohorts were visualized in the IGV browser. The TSS enrichment scores were obtained from the TCGA chromatin accessibility landscape: <https://gdc.cancer.gov/about-data/publications/ATACseq-AW>. Two prostate cancer samples with minimal (TCGA-EJ-A46F) and maximum (TCGA-EJ-A8FP) enrichment scores were chosen to bona fide present the consistent accessible profiling surrounding the rs60464856 locus in prostate cancer genome.

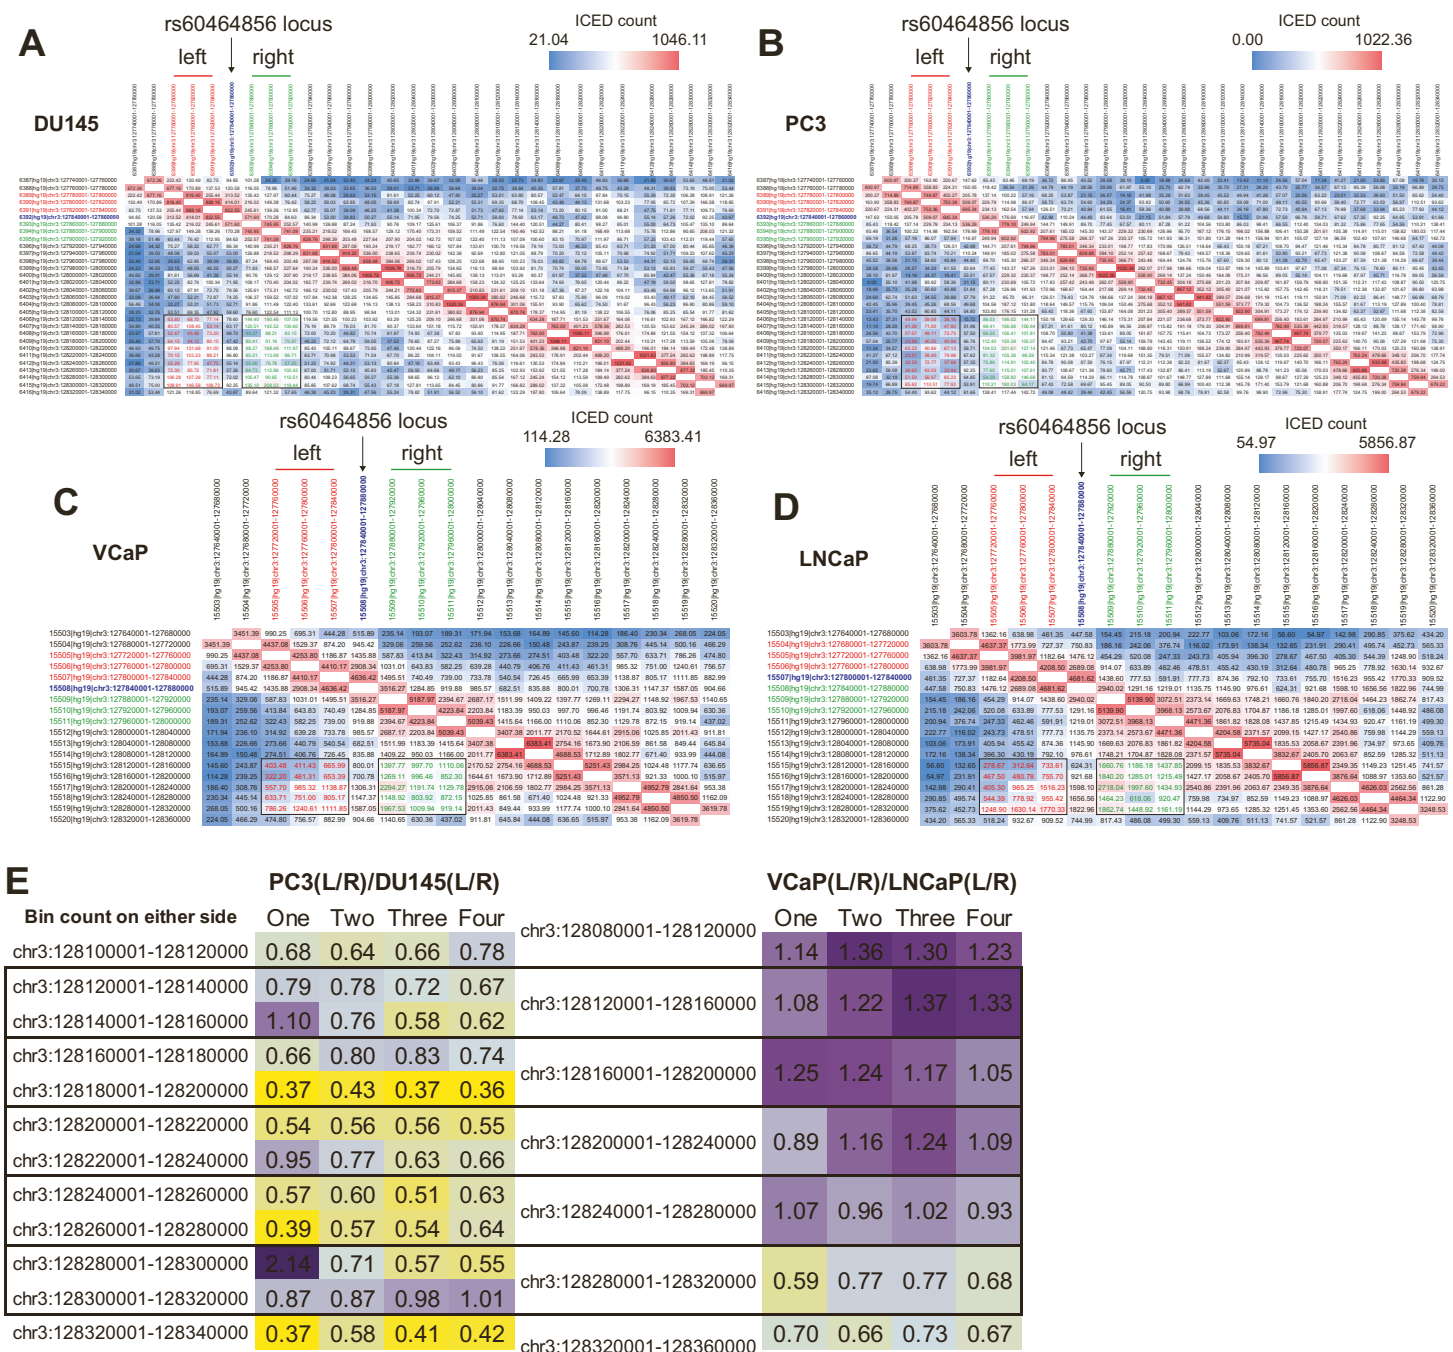

**Figure S6. Detail Hi-C analysis in prostate cell lines to calculate left-to-right (L/R) ratio.** A-D. ICED count matrix surrounding the hotspot centering on rs60464856 in the HiC heatmap of DU145 (A), PC3 (B), VCaP (C) and LNCaP (D). The ICED count for the hotspot was aggregated for the left (red numbers) and the right (green numbers), and further divided from left to right to obtain the L/R ratio in each cell line. E. Additional L/R ratios calculated based on various other options, including ratios calculated from different bin numbers on each side, and ratios calculated from individual bins in the distant regions.

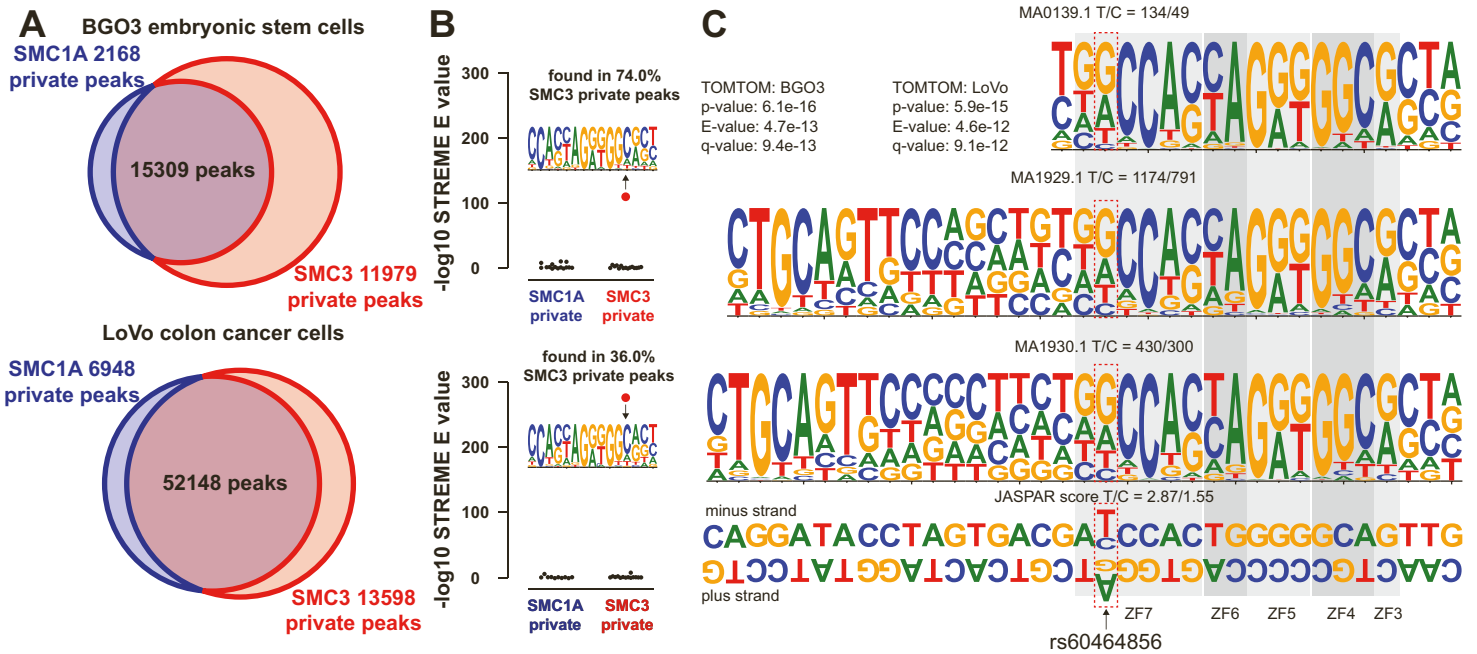

**Figure S7. Motif analysis for SMC1A and SMC3 in human cell lines.** **A.** Proportional Venn diagram of SMC1A and SMC3 ChIP-seq peak overlapping in BGO3 and LoVo cell lines. The private peak was highlighted with color strokes in the pie chart. We defined the private peak regions as those merely showed in SMC1A or SMC3 ChIP-seq capturing. **B.** STREME motif scan in BGO3 and LoVo cell lines. **C.** TOMTOM comparison of SMC3 private motif to CTCF(MA0139.1) and base composition on SNP location in different CTCF motifs. The shaded blocks highlighted DNA binding sites interacting with CTCF zinc finger (ZF) domains.



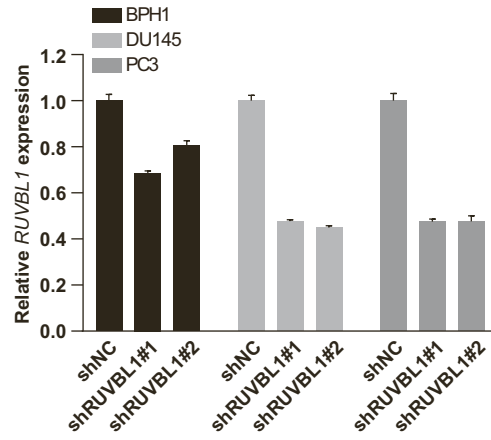

**Figure S8. qPCR results of lentiviral shRNA knockdown in BPH1, DU145 and PC3 cells.** The error bar represented standard error across three technical replicates for each shRNA clone.

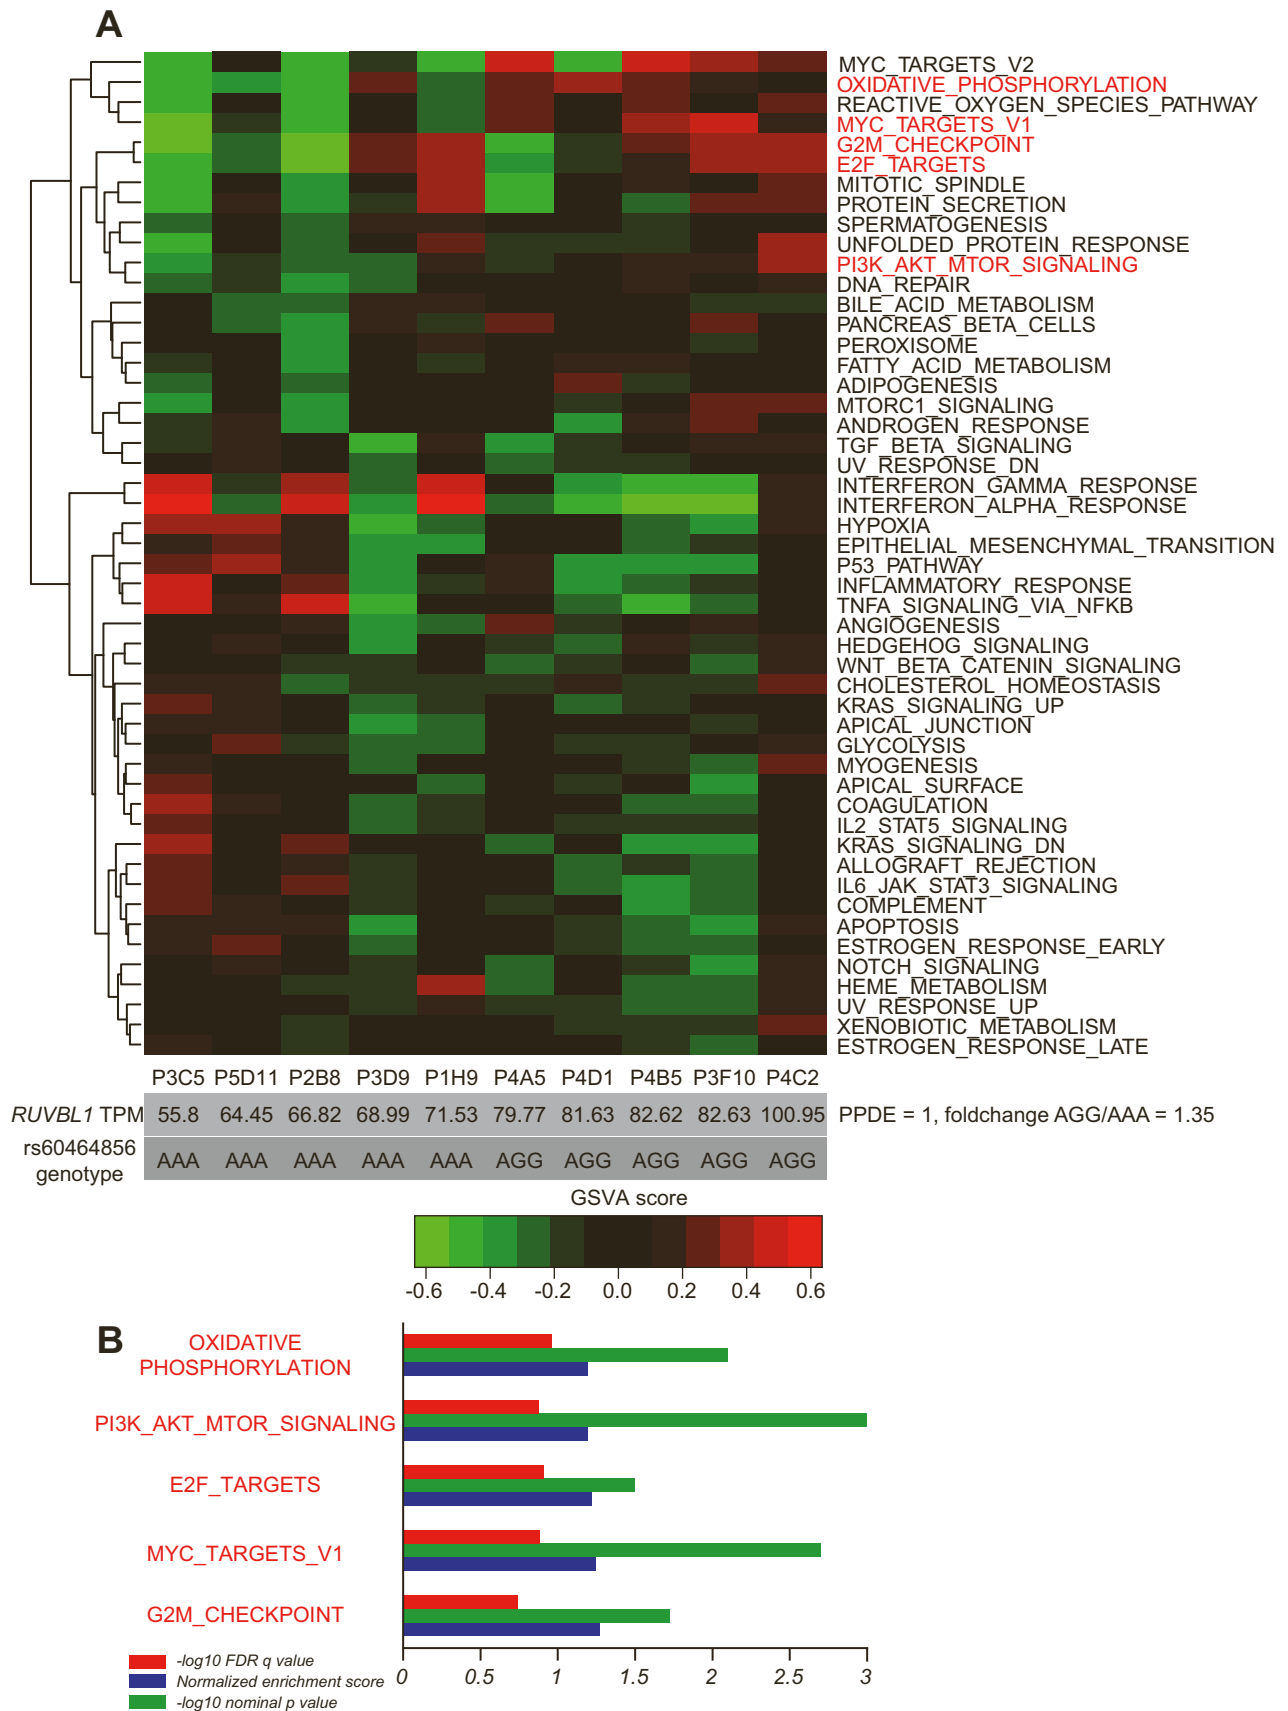

**Figure S9. RNA-seq profiling of base edited BPH1 clones** **A.** GSEA score heatmap of the HALLMARK gene set collections. Pathways enriched with the top 5 normalized enrichment scores were highlighted. **B.** Top 5 enriched HALLMARK pathways with detailed GSEA metrics, including nominal pvalue, FDR qvalue and normalized enrichment score.

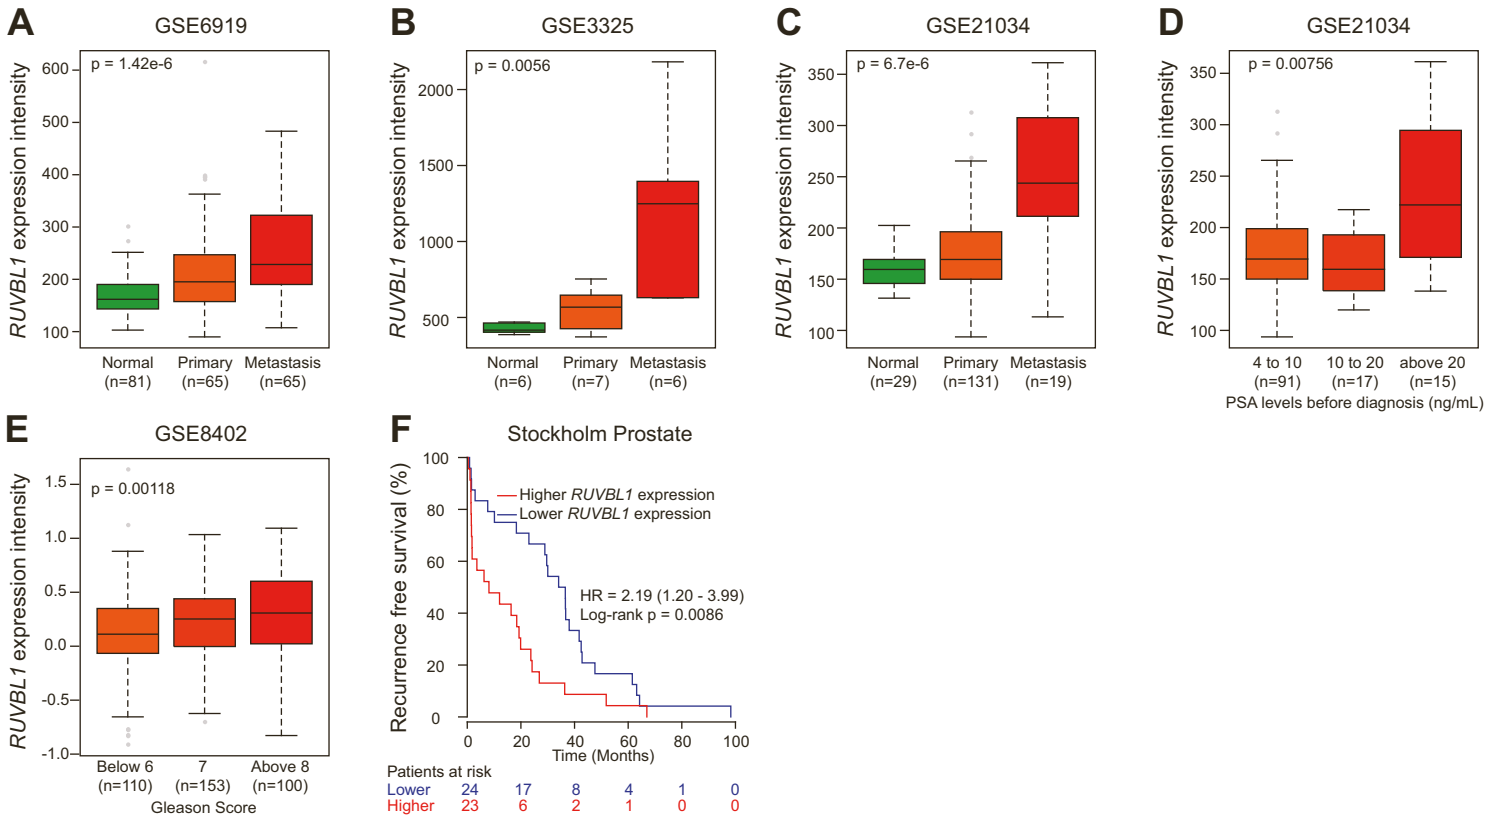

**Figure S10. Associations between *RUVBL1* gene expression and clinicopathological variables in other prostate cancer cohorts.** **A-C.** Associations between *RUVBL1* gene expression and prostate cancer tissue type in Yu (**A**), Varambally (**B**), and Taylor’s (**C**) prostate cancer cohorts. **D.** Associations between *RUVBL1* gene expression and the pre-diagnosis prostate-specific antigen (PSA) levels in Taylor’s prostate cancer cohorts. **E.** Associations between *RUVBL1* gene expression and the Gleason score in Setlur’s prostate cancer cohorts. **F.** Kaplan-Meier analysis on biochemical recurrence-free survival in Stockholm prostate cohort stratified by *RUVBL1* expression. The Mann-Whitney U test was used to calculate the p-value for A to E. The whiskers are drawn down to the 10th percentile and up to the 90th.

## Supplementary Tables

| Primer Sequences for QPCR                        |                                        |
|--------------------------------------------------|----------------------------------------|
| RUVBL1-mRNA-F                                    | AGGTGAAGAGCACTACGAAGA                  |
| RUVBL1-mRNA-R                                    | CTACTATGACGCCACATGCCT                  |
| ACTB-mRNA-F                                      | CCAGAGCAAGAGAGGCATCC                   |
| ACTB-mRNA-R                                      | GTACATGGCTGGGGTGTGA                    |
| Primer Sequences for reporter assay construction |                                        |
| RUVBL1_Gibson_F                                  | cggcgccaagcttagacacCACATCTCACGTTGCAAG  |
| RUVBL1_Gibson_R                                  | aacagtaccggattgccaagTCTTCATTTTGCAGACGC |
| shRNA sequences                                  |                                        |
| shRUVBL1#1-Sense                                 | GUGGCGUCAUAGUAGAAUUA                   |
| shRUVBL1#1-Antisense                             | UUAAUUCUACUAUGACGCCAC                  |
| shRUVBL1#2-Sense                                 | CCGCCAACUUGCUUGCUAAA                   |
| shRUVBL1#2-Antisense                             | UUUAGCAAGCAAGUUGGCCGG                  |
| shNC-Sense                                       | CCUAAGGUUAAGUCGCCUCG                   |
| shNC-Antisense                                   | CGAGGGCGACUUAACCUUAGG                  |
| Primers for genome editing                       |                                        |
| rs60464856-A2G-gRNA                              | TGGATCGTCACTAGGTATCC                   |
| rs60464856-Sanger-F                              | TAATTCGGCTGTATCCCAGTGTC                |
| rs60464856-Sanger-R                              | CCCGCCATTATTTCTCAGGGAAGT               |
| ARMS-F-outer                                     | AACCGTCCCATAGCCTGCCACTGCATTC           |
| ARMS-R-outer                                     | AGAGGTGTGGCCAGTGGACCAGGGAGTT           |
| ARMS-R-inner                                     | GGGGCCGCCCCAGGATACCTAGTGACTAC          |
| Primers for ChIP-qPCR                            |                                        |
| rs60464856-locus-F                               | TAATTCGGCTGTATCCCAGTGTC                |
| rs60464856-locus-R                               | CCCGCCATTATTTCTCAGGGAAGT               |
| rs60464856-NC-F                                  | AAGTGAGGCATTCTATGGGACTG                |
| rs60464856-NC-R                                  | CCAGGGGATATTTCTCTGTGC                  |
| AS-rs60464856-R-A                                | CCAGGATACCTAGTGACGAC                   |
| AS-rs60464856-R-G                                | CCAGGATACCTAGTGACGAT                   |
| AS-rs60464856-F                                  | CAAAGCCCTGCAGTAACTAACC                 |

**Table S1. Sequences of primers and oligos used in this project.**

|                         | Accession number and web link                  |
|-------------------------|------------------------------------------------|
| DU145 – H3K4me1         | SRR3624829, SRR3624830                         |
| DU145 – H3K4me3         | SRR3624831                                     |
| DU145 – H3K27ac         | SRR5823947                                     |
| PC-3 – H3K4me1          | ENCSR566UMF                                    |
| PC-3 – H3K4me3          | ENCSR275NCH                                    |
| PC-3 – H3K27ac          | ENCSR826UTD                                    |
| PrEC – H3K4me1          | SRR1282226                                     |
| PrEC – H3K4me3          | SRR1282227                                     |
| PrEC – H3K27ac          | SRR1282224                                     |
| RWPE-1 – H3K4me1        | SRR1645120, SRR1645121                         |
| RWPE-1 – H3K4me3        | SRR1645122, SRR1645123                         |
| RWPE-1 – H3K27ac        | SRR1645108, SRR1645109, SRR1645110, SRR1645111 |
| BGO-SMC1                | SRR445918                                      |
| BGO-SMC3                | SRR445917                                      |
| LoVo-SMC1               | SRR952473                                      |
| LoVo-SMC3               | SRR952474                                      |
| Yu's PCa cohort         | GSE6919                                        |
| Varambally's PCa cohort | GSE3325                                        |
| Taylor's PCa cohort     | GSE21034                                       |
| Setlur's PCa cohort     | GSE8402                                        |
| Stockholm's PCa cohort  | GSE70769                                       |

**Table S4. Published datasets used in this project.**

**Table S2 (Spreadsheet table).** CRISPRi gRNA design and readout quantification.

**Table S3 (Spreadsheet table).** Proliferative essential SNPs identified in the RIGER analysis.

**Table S5 (Spreadsheet table).** DNA pull down profiling in BPH1 SILAC proteomics.

## Supplemental Material and Methods

### The motif analysis of SMC1A and SMC3 ChIP-seq data

To identify the SMC1A or SMC3 specific binding motif, we retrieved the ChIP-seq peak BED files (Download: BED Peaks menu) of BGO3 and LoVo cell lines from Cistrome Data Browser (<http://cistrome.org/db/#/>) and used intervene software (<https://intervene.readthedocs.io/en/latest/introduction.html>) to determine the private peaks. We defined the SMC1A private peaks as those without any overlap with SMC3 peaks, and vice versa for the SMC3 private peaks. As a result, we obtained 2,168 private peaks for SMC1A and 11,979 private peaks for SMC3 in BGO3 cells, and 6,948 private peaks for SMC1A and 13,598 private peaks for SMC3 in LoVo cells. We then used the STREME module in MEME Suite (<https://meme-suite.org/meme/index.html>) to scan for motif enrichment with shuffled control sequences under default settings. We plotted all motifs discovered with E-value less than 0.05 for each scanning and compared the standing out motif (red dot in Figure S7B) to the HOCOMOCO motif collection with TOMTOM module to identify known DNA motifs.

## Author list for PRACTICAL Consortium

Rosalind A. Eeles<sup>1,2</sup>, Christopher A. Haiman<sup>3</sup>, Zsofia Kote-Jarai<sup>1</sup>, Fredrick R. Schumacher<sup>4,5</sup>, Sara Benlloch<sup>6,1</sup>, Ali Amin Al Olama<sup>6,7</sup>, Kenneth R. Muir<sup>8</sup>, Sonja I. Berndt<sup>9</sup>, David V. Conti<sup>3</sup>, Fredrik Wiklund<sup>10</sup>, Stephen Chanock<sup>9</sup>, Ying Wang<sup>11</sup>, Catherine M. Tangen<sup>12</sup>, Jyotsna Batra<sup>13,14</sup>, Judith A. Clements<sup>13,14</sup>, APCB BioResource (Australian Prostate Cancer BioResource)<sup>15,14</sup>, Henrik Grönberg<sup>10</sup>, Nora Pashayan<sup>16,17</sup>, Johanna Schleutker<sup>18,19</sup>, Demetrius Albanes<sup>9</sup>, Stephanie J. Weinstein<sup>9</sup>, Alicja Wolk<sup>20</sup>, Catharine M. L. West<sup>21</sup>, Lorelei A. Mucci<sup>22</sup>, Géraldine Cancel-Tassin<sup>23,24</sup>, Stella Koutros<sup>9</sup>, Karina Dalsgaard Sørensen<sup>25,26</sup>, Eli Marie Grindedal<sup>27</sup>, David E. Neal<sup>28,29,30</sup>, Freddie C. Hamdy<sup>31,32</sup>, Jenny L. Donovan<sup>33</sup>, Ruth C. Travis<sup>34</sup>, Robert J. Hamilton<sup>35,36</sup>, Sue Ann Ingles<sup>37</sup>, Barry S. Rosenstein<sup>38</sup>, Yong-Jie Lu<sup>39</sup>, Graham G. Giles<sup>40,41,42</sup>, Robert J. MacInnis<sup>40,41</sup>, Adam S. Kibel<sup>43</sup>, Ana Vega<sup>44,45,46</sup>, Manolis Kogevinas<sup>47,48,49,50</sup>, Kathryn L. Penney<sup>51</sup>, Jong Y. Park<sup>52</sup>, Janet L. Stanford<sup>53,54</sup>, Cezary Cybulski<sup>55</sup>, Børge G. Nordestgaard<sup>56,57</sup>, Sune F. Nielsen<sup>56,57</sup>, Hermann Brenner<sup>58,59,60</sup>, Christiane Maier<sup>61</sup>, Jeri Kim<sup>62</sup>, Esther M. John<sup>63</sup>, Manuel R. Teixeira<sup>64,65,66</sup>, Susan L. Neuhausen<sup>67</sup>, Kim De Ruyck<sup>68</sup>, Azad Razack<sup>69</sup>, Lisa F. Newcomb<sup>53,70</sup>, Davor Lesel<sup>71</sup>, Radka Kaneva<sup>72</sup>, Nawaid Usmani<sup>73,74</sup>, Frank Claessens<sup>75</sup>, Paul A. Townsend<sup>76,77</sup>, Jose Esteban Castelao<sup>78</sup>, Monique J. Roobol<sup>79</sup>, Florence Menegaux<sup>80</sup>, Kay-Tee Khaw<sup>81</sup>, Lisa Cannon-Albright<sup>82,83</sup>, Hardev Pandha<sup>77</sup>, Stephen N. Thibodeau<sup>84</sup>, David J. Hunter<sup>85</sup>, Peter Kraft<sup>86</sup>, William J. Blot<sup>87,88</sup>, Elio Riboli<sup>89</sup>

<sup>1</sup>The Institute of Cancer Research, London, SM2 5NG, UK

<sup>2</sup>Royal Marsden NHS Foundation Trust, London, SW3 6JJ, UK

<sup>3</sup>Center for Genetic Epidemiology, Department of Preventive Medicine, Keck School of Medicine, University of Southern California/Norris Comprehensive Cancer Center, Los Angeles, CA 90015, USA

<sup>4</sup>Department of Population and Quantitative Health Sciences, Case Western Reserve University, Cleveland, OH 44106-7219, USA

<sup>5</sup>Seidman Cancer Center, University Hospitals, Cleveland, OH 44106, USA.

<sup>6</sup>Centre for Cancer Genetic Epidemiology, Department of Public Health and Primary Care, University of Cambridge, Strangeways Research Laboratory, Cambridge CB1 8RN, UK

<sup>7</sup>University of Cambridge, Department of Clinical Neurosciences, Stroke Research Group, R3, Box 83, Cambridge Biomedical Campus, Cambridge CB2 0QQ, UK

<sup>8</sup>Division of Population Health, Health Services Research and Primary Care, University of Manchester, Oxford Road, Manchester, M13 9PL, UK

<sup>9</sup>Division of Cancer Epidemiology and Genetics, National Cancer Institute, NIH, Bethesda, Maryland, 20892, USA

<sup>10</sup>Department of Medical Epidemiology and Biostatistics, Karolinska Institute, SE-171 77 Stockholm, Sweden

<sup>11</sup>Department of Population Science, American Cancer Society, 250 Williams Street, Atlanta, GA 30303, USA

<sup>12</sup>SWOG Statistical Center, Fred Hutchinson Cancer Research Center, Seattle, WA 98109, USA

<sup>13</sup>Australian Prostate Cancer Research Centre-Qld, Institute of Health and Biomedical Innovation and School of Biomedical Sciences, Queensland University of Technology, Brisbane QLD 4059, Australia

<sup>14</sup>Translational Research Institute, Brisbane, Queensland 4102, Australia

<sup>15</sup>Australian Prostate Cancer Research Centre-Qld, Queensland University of Technology, Brisbane; Prostate Cancer Research Program, Monash University, Melbourne; Dame Roma Mitchell Cancer Centre, University of Adelaide, Adelaide; Chris O'Brien Lifehouse and The Kinghorn Cancer Centre, Sydney, Australia



- <sup>16</sup>Department of Applied Health Research, University College London, London, WC1E 7HB, UK
- <sup>17</sup>Centre for Cancer Genetic Epidemiology, Department of Oncology, University of Cambridge, Strangeways Laboratory, Worts Causeway, Cambridge, CB1 8RN, UK
- <sup>18</sup>Institute of Biomedicine, University of Turku, Finland
- <sup>19</sup>Department of Medical Genetics, Genomics, Laboratory Division, Turku University Hospital, PO Box 52, 20521 Turku, Finland
- <sup>20</sup>Department of Surgical Sciences, Uppsala University, 75185 Uppsala, Sweden
- <sup>21</sup>Division of Cancer Sciences, University of Manchester, Manchester Academic Health Science Centre, Radiotherapy Related Research, The Christie Hospital NHS Foundation Trust, Manchester, M13 9PL UK
- <sup>22</sup>Department of Epidemiology, Harvard T. H. Chan School of Public Health, Boston, MA 02115, USA
- <sup>23</sup>CeRePP, Tenon Hospital, F-75020 Paris, France.
- <sup>24</sup>Sorbonne Universite, GRC n°5 , AP-HP, Tenon Hospital, 4 rue de la Chine, F-75020 Paris, France
- <sup>25</sup>Department of Molecular Medicine, Aarhus University Hospital, Palle Juul-Jensen Boulevard 99, 8200 Aarhus N, Denmark
- <sup>26</sup>Department of Clinical Medicine, Aarhus University, DK-8200 Aarhus N
- <sup>27</sup>Department of Medical Genetics, Oslo University Hospital, 0424 Oslo, Norway
- <sup>28</sup>Nuffield Department of Surgical Sciences, University of Oxford, Room 6603, Level 6, John Radcliffe Hospital, Headley Way, Headington, Oxford, OX3 9DU, UK
- <sup>29</sup>University of Cambridge, Department of Oncology, Box 279, Addenbrooke's Hospital, Hills Road, Cambridge CB2 0QQ, UK
- <sup>30</sup>Cancer Research UK, Cambridge Research Institute, Li Ka Shing Centre, Cambridge, CB2 0RE, UK
- <sup>31</sup>Nuffield Department of Surgical Sciences, University of Oxford, Oxford, OX1 2JD, UK
- <sup>32</sup>Faculty of Medical Science, University of Oxford, John Radcliffe Hospital, Oxford, UK
- <sup>33</sup>Population Health Sciences, Bristol Medical School, University of Bristol, BS8 2PS, UK
- <sup>34</sup>Cancer Epidemiology Unit, Nuffield Department of Population Health, University of Oxford, Oxford, OX3 7LF, UK
- <sup>35</sup>Dept. of Surgical Oncology, Princess Margaret Cancer Centre, Toronto ON M5G 2M9, Canada
- <sup>36</sup>Dept. of Surgery (Urology), University of Toronto, Canada
- <sup>37</sup>Department of Preventive Medicine, Keck School of Medicine, University of Southern California/Norris Comprehensive Cancer Center, Los Angeles, CA 90015, USA
- <sup>38</sup>Department of Radiation Oncology and Department of Genetics and Genomic Sciences, Box 1236, Icahn School of Medicine at Mount Sinai, One Gustave L. Levy Place, New York, NY 10029, USA
- <sup>39</sup>Centre for Cancer Biomarker and Biotherapeutics, Barts Cancer Institute, Queen Mary University of London, John Vane Science Centre, Charterhouse Square, London, EC1M 6BQ, UK
- <sup>40</sup>Cancer Epidemiology Division, Cancer Council Victoria, 615 St Kilda Road, Melbourne, VIC 3004, Australia
- <sup>41</sup>Centre for Epidemiology and Biostatistics, Melbourne School of Population and Global Health, The University of Melbourne, Grattan Street, Parkville, VIC 3010, Australia
- <sup>42</sup>Precision Medicine, School of Clinical Sciences at Monash Health, Monash University, Clayton, Victoria 3168, Australia
- <sup>43</sup>Division of Urologic Surgery, Brigham and Womens Hospital, 75 Francis Street, Boston, MA 02115, USA
- <sup>44</sup>Fundación Pública Galega Medicina Xenómica, Santiago de Compostela, 15706, Spain.
- <sup>45</sup>Instituto de Investigación Sanitaria de Santiago de Compostela, Santiago de Compostela, 15706, Spain.
- <sup>46</sup>Centro de Investigación en Red de Enfermedades Raras (CIBERER), Spain
- <sup>47</sup>ISGlobal, Barcelona, Spain
- <sup>48</sup>IMIM (Hospital del Mar Medical Research Institute), Barcelona, Spain
- <sup>49</sup>Universitat Pompeu Fabra (UPF), Barcelona, Spain
- <sup>50</sup>CIBER Epidemiología y Salud Pública (CIBERESP), 28029 Madrid, Spain
- <sup>51</sup>Channing Division of Network Medicine, Department of Medicine, Brigham and Women's Hospital/Harvard Medical School, Boston, MA 02115, USA
- <sup>52</sup>Department of Cancer Epidemiology, Moffitt Cancer Center, 12902 Magnolia Drive, Tampa, FL 33612,

## USA

<sup>53</sup>Division of Public Health Sciences, Fred Hutchinson Cancer Research Center, Seattle, Washington, 98109-1024, USA

<sup>54</sup>Department of Epidemiology, School of Public Health, University of Washington, Seattle, Washington 98195, USA

<sup>55</sup>International Hereditary Cancer Center, Department of Genetics and Pathology, Pomeranian Medical University, 70-115 Szczecin, Poland

<sup>56</sup>Faculty of Health and Medical Sciences, University of Copenhagen, 2200 Copenhagen, Denmark

<sup>57</sup>Department of Clinical Biochemistry, Herlev and Gentofte Hospital, Copenhagen University Hospital, Herlev, 2200 Copenhagen, Denmark

<sup>58</sup>Division of Clinical Epidemiology and Aging Research, German Cancer Research Center (DKFZ), D-69120, Heidelberg, Germany

<sup>59</sup>German Cancer Consortium (DKTK), German Cancer Research Center (DKFZ), D-69120 Heidelberg, Germany

<sup>60</sup>Division of Preventive Oncology, German Cancer Research Center (DKFZ) and National Center for Tumor Diseases (NCT), Im Neuenheimer Feld 460, 69120 Heidelberg, Germany

<sup>61</sup>Humangenetik Tuebingen, Paul-Ehrlich-Str 23, D-72076 Tuebingen, Germany

<sup>62</sup>The University of Texas M. D. Anderson Cancer Center, Department of Genitourinary Medical Oncology, 1515 Holcombe Blvd., Houston, TX 77030, USA

<sup>63</sup>Departments of Epidemiology & Population Health and of Medicine, Division of Oncology, Stanford Cancer Institute, Stanford University School of Medicine, Stanford, CA 94304 USA

<sup>64</sup>Department of Laboratory Genetics, Portuguese Oncology Institute of Porto (IPO Porto) / Porto Comprehensive Cancer Center, Porto, Portugal

<sup>65</sup>Cancer Genetics Group, IPO Porto Research Center (CI-IPOP) / RISE@CI-IPOP (Health Research Network), Portuguese Oncology Institute of Porto (IPO Porto) / Porto Comprehensive Cancer Center, Porto, Portugal

<sup>66</sup>School of Medicine and Biomedical Sciences (ICBAS), University of Porto, Porto, Portugal

<sup>67</sup>Department of Population Sciences, Beckman Research Institute of the City of Hope, 1500 East Duarte Road, Duarte, CA 91010

<sup>68</sup>Ghent University, Faculty of Medicine and Health Sciences, Basic Medical Sciences, Proeftuinstraat 86, B-9000 Gent

<sup>69</sup>Department of Surgery, Faculty of Medicine, University of Malaya, 50603 Kuala Lumpur, Malaysia

<sup>70</sup>Department of Urology, University of Washington, 1959 NE Pacific Street, Box 356510, Seattle, WA 98195, USA

<sup>71</sup>Institute of Human Genetics, University Medical Center Hamburg-Eppendorf, D-20246 Hamburg, Germany

<sup>72</sup>Molecular Medicine Center, Department of Medical Chemistry and Biochemistry, Medical University of Sofia, Sofia, 2 Zdrave Str., 1431 Sofia, Bulgaria

<sup>73</sup>Department of Oncology, Cross Cancer Institute, University of Alberta, 11560 University Avenue, Edmonton, Alberta, Canada T6G 1Z2

<sup>74</sup>Division of Radiation Oncology, Cross Cancer Institute, 11560 University Avenue, Edmonton, Alberta, Canada T6G 1Z2

<sup>75</sup>Molecular Endocrinology Laboratory, Department of Cellular and Molecular Medicine, KU Leuven, BE-3000, Belgium

<sup>76</sup>Division of Cancer Sciences, Manchester Cancer Research Centre, Faculty of Biology, Medicine and Health, Manchester Academic Health Science Centre, NIHR Manchester Biomedical Research Centre, Health Innovation Manchester, University of Manchester, M13 9WL

<sup>77</sup>The University of Surrey, Guildford, Surrey, GU2 7XH, UK

<sup>78</sup>Genetic Oncology Unit, CHUVI Hospital, Complejo Hospitalario Universitario de Vigo, Instituto de Investigación Biomédica Galicia Sur (IISGS), 36204, Vigo (Pontevedra), Spain

<sup>79</sup>Department of Urology, Erasmus University Medical Center, Cancer Institute, 3015 GD Rotterdam, The Netherlands

<sup>80</sup>"Exposome and Heredity", CESP (UMR 1018), Faculté de Médecine, Université Paris-Saclay, Inserm, Gustave Roussy, Villejuif

<sup>81</sup>Clinical Gerontology Unit, University of Cambridge, Cambridge, CB2 2QQ, UK

<sup>82</sup>Division of Epidemiology, Department of Internal Medicine, University of Utah School of Medicine, Salt Lake City, Utah 84132, USA

<sup>83</sup>George E. Wahlen Department of Veterans Affairs Medical Center, Salt Lake City, Utah 84148, USA

<sup>84</sup>Department of Laboratory Medicine and Pathology, Mayo Clinic, Rochester, MN 55905, USA

<sup>85</sup>Nuffield Department of Population Health, University of Oxford, United Kingdom

<sup>86</sup>Program in Genetic Epidemiology and Statistical Genetics, Department of Epidemiology, Harvard School of Public Health, Boston, MA, USA

<sup>87</sup>Division of Epidemiology, Department of Medicine, Vanderbilt University Medical Center, 2525 West End Avenue, Suite 800, Nashville, TN 37232 USA.

<sup>88</sup>International Epidemiology Institute, Rockville, MD 20850, USA

<sup>89</sup>Department of Epidemiology and Biostatistics, School of Public Health, Imperial College London, SW7 2AZ, UK

## **Acknowledgements for PRACTICAL Consortium**

### CRUK and PRACTICAL consortium

This work was supported by the Canadian Institutes of Health Research, European Commission's Seventh Framework Programme grant agreement n° 223175 (HEALTH-F2-2009-223175), Cancer Research UK Grants C5047/A7357, C1287/A10118, C1287/A16563, C5047/A3354, C5047/A10692, C16913/A6135, and The National Institute of Health (NIH) Cancer Post-Cancer GWAS initiative grant: No. 1 U19 CA 148537-01 (the GAME-ON initiative).

We would also like to thank the following for funding support: The Institute of Cancer Research and The Everyman Campaign, The Prostate Cancer Research Foundation, Prostate Research Campaign UK (now PCUK), The Orchid Cancer Appeal, Rosetrees Trust, The National Cancer Research Network UK, The National Cancer Research Institute (NCRI) UK. We are grateful for support of NIHR funding to the NIHR Biomedical Research Centre at The Institute of Cancer Research, The Royal Marsden NHS Foundation Trust, and Manchester NIHR Biomedical Research Centre. The Prostate Cancer Program of Cancer Council Victoria also acknowledge grant support from The National Health and Medical Research Council, Australia (126402, 209057, 251533, , 396414, 450104, 504700, 504702, 504715, 623204, 940394, 614296.), VicHealth, Cancer Council Victoria, The Prostate Cancer Foundation of Australia, The Whitten Foundation, PricewaterhouseCoopers, and Tattersall's. EAO, DMK, and EMK acknowledge the Intramural Program of the National Human Genome Research Institute for their support.

Genotyping of the OncoArray was funded by the US National Institutes of Health (NIH) [U19 CA 148537 for ELucidating Loci Involved in Prostate cancer SuscEptibility (ELLIPSE) project and X01HG007492 to the Center for Inherited Disease Research (CIDR) under contract number HHSN268201200008I]. Additional analytic support was provided by NIH NCI U01 CA188392 (PI: Schumacher).

Research reported in this publication also received support from the National Cancer Institute of the National Institutes of Health under Award Numbers U10 CA37429 (CD Blanke), and UM1 CA182883 (CM Tangen/IM Thompson). The content is solely the responsibility of the authors and does not necessarily represent the official views of the National Institutes of Health.

Funding for the iCOGS infrastructure came from: the European Community's Seventh Framework Programme under grant agreement n° 223175 (HEALTH-F2-2009-223175) (COGS), Cancer Research UK (C1287/A10118, C1287/A 10710, C12292/A11174, C1281/A12014, C5047/A8384, C5047/A15007, C5047/A10692, C8197/A16565), the National Institutes of Health (CA128978) and Post-Cancer GWAS initiative (1U19 CA148537, 1U19 CA148065 and 1U19 CA148112 - the GAME-ON initiative), the Department of Defence (W81XWH-10-1-0341), the Canadian Institutes of Health Research (CIHR) for the CIHR Team in Familial Risks of Breast Cancer, Komen Foundation for the Cure, the Breast Cancer Research Foundation, and the Ovarian Cancer Research Fund.

### BPC3

The BPC3 was supported by the U.S. National Institutes of Health, National Cancer Institute (cooperative agreements U01-CA98233 to D.J.H., U01-CA98710 to S.M.G., U01-CA98216 to E.R., and U01-CA98758 to B.E.H., and Intramural Research Program of NIH/National Cancer Institute, Division of Cancer Epidemiology and Genetics).

### CAPS

CAPS GWAS study was supported by the Cancer Risk Prediction Center (CRisP; [www.crispcenter.org](http://www.crispcenter.org)), a Linneus Centre (Contract ID 70867902) financed by the Swedish Research Council, (grant no K2010-70X-20430-04-3), the Swedish Cancer Foundation (grant no 09-0677), the Hedlund Foundation, the Soederberg Foundation, the Enqvist Foundation, ALF funds from the Stockholm County Council. Stiftelsen Johanna Hagstrand och Sigfrid Linner's Minne, Karlsson's Fund for urological and surgical research.

### PEGASUS

PEGASUS was supported by the Intramural Research Program, Division of Cancer Epidemiology and Genetics, National Cancer Institute, National Institutes of Health.
